# Supplementary material for: Uremic Toxins and Vascular Calcification–Missing the Forest for All the Trees
Source: PubMed Central journal article supplement (PMC7599869; doi:10.3390/toxins12100624), 2020-09-29
Supplement: toxins-12-00624-s001.pdf [file toxins-12-00624-s001.pdf]

# Supplementary Materials: Uremic toxins and vascular calcification – missing the forest for all the trees

Nikolas Rapp, Pieter Evenepoel, Peter Stenvinkel and Leon Schurgers

**Table S1.** Full table of the MM and their influence on calcification, as well as their effects on VC related processes in VSMC = increase, = decrease, – = tested, but no effect, ~ = unclear effect.

| Uremic retention molecule       | Calcification - in vitro | Calcification - in vivo | Calcification - Clinical studies | Osteogenesis | Oxidative stress | Inflammation | Apoptosis            | Senescence | Proliferation               | Migration               | Atherosclerosis  |
|---------------------------------|--------------------------|-------------------------|----------------------------------|--------------|------------------|--------------|----------------------|------------|-----------------------------|-------------------------|------------------|
| Adiponectin                     | ↓[1–3]<br>–[4]           | ↓[5,6]                  | ↑[7–9]<br>↓[10,11]<br>–[12–14]   | ↓[1,6]       |                  | ↓[15]        | ↓[3,5]               |            | ↓[16–23]<br>~[24]           | ↓[20,21,25,26]          | ↓[26,27]         |
| Adrenomedullin                  | ↓[28,29]                 | ↓[28,30]                |                                  | [30]         | ↓[31,32]         |              |                      |            | ↑[33,34]<br>↓[35–41]        | ↓[42–44]                |                  |
| alpha 1 microglobulin           |                          |                         |                                  |              | ↓[45]            |              |                      |            |                             |                         |                  |
| Atrial Natriuretic Peptide      |                          |                         |                                  |              | ↓[46,47]         |              | ↑[48]<br>↓[49]       |            | ↑[47,50–64]                 | ↓[50,65,66]             | ↓[62]            |
| Basic fibroblast growth factor  |                          |                         |                                  |              | ↑[67]            |              | ↓[68–72]             |            | ↑[72–88]<br>↓[89]           | ↑[67,78,79,82,85,90–99] | ↑[88]<br>↓[100]  |
| beta trace protein              |                          |                         |                                  |              |                  |              |                      |            |                             |                         |                  |
| Calcitonin                      |                          |                         |                                  |              |                  |              |                      |            |                             |                         |                  |
| Calcitonin gene-related peptide |                          |                         |                                  |              | ↓[101,102]       | ↓[103]       | ↑[104]<br>↓[101,105] |            | ↑[106]<br>↓[39,102,106–112] | ↓[102,113]              |                  |
| Cholecystokinin                 |                          |                         |                                  |              |                  | ↓[114]       |                      |            |                             |                         |                  |
| Clara cell protein (CC16)       |                          |                         |                                  |              |                  |              |                      |            |                             |                         |                  |
| Complement Factor D             |                          |                         |                                  |              |                  |              |                      |            |                             |                         |                  |
| Cystatin C                      |                          |                         |                                  |              |                  | ↑[115]       | ↑[115]               |            |                             | ↓[116]                  | ↑[117]<br>↓[118] |











---

|                                   |        |        |            |                      |                      |  |                      |
|-----------------------------------|--------|--------|------------|----------------------|----------------------|--|----------------------|
| Creatinine                        |        |        |            |                      |                      |  |                      |
| Cystein                           |        |        | ↑[619]     |                      |                      |  | —[619]               |
| Cytidine                          |        |        |            |                      |                      |  |                      |
| Decanal                           |        |        |            |                      |                      |  |                      |
| Dimethylamine                     |        |        |            |                      |                      |  |                      |
| Dimethylglycine                   |        |        |            |                      |                      |  |                      |
| Erythritol                        |        |        |            |                      |                      |  |                      |
| Ethylamine                        |        |        |            |                      |                      |  |                      |
| Guanidine                         | —[607] |        |            |                      |                      |  | —[607]               |
| Guanidino acetic acid             | —[607] |        |            |                      |                      |  | —[607]               |
| Guanidino succinic acid           | ↓[607] |        |            |                      |                      |  | —[607]               |
| Heptanal                          |        |        |            |                      |                      |  |                      |
| Hexanal                           |        |        |            |                      |                      |  |                      |
| Hypoxanthine                      |        |        | ↑[620,621] | ↑[622]               |                      |  | ↓[623]<br>—[624]     |
| Inosine                           |        |        |            |                      |                      |  |                      |
| Malondialdehyde (MDA)             |        |        |            |                      | ↑[596]               |  |                      |
| Mannitol                          |        |        |            | ↑[625,626]<br>—[627] | ↑[628–630]<br>—[631] |  | —[631,632]    —[631] |
| Methylguanidine                   | —[607] |        |            |                      |                      |  | —[607]               |
| Monomethylamine                   | ↓[633] | ↓[633] |            |                      | ↑[634]               |  |                      |
| Myoinositol                       |        |        |            |                      |                      |  |                      |
| N-methyl-2-pyridone-5-carboxamide |        |        |            |                      |                      |  |                      |
| N-methyl-4-pyridone-3-carboxamide |        |        |            |                      |                      |  |                      |
| N2,N2-Dimethylguanosine           |        |        |            |                      |                      |  |                      |
| N4-Acetylcytidine                 |        |        |            |                      |                      |  |                      |
| N6-Methyladenosine                |        |        |            |                      |                      |  |                      |

---





---

$\alpha$ -keto- $\delta$ -  
Guanidinovaleric Acid

$\alpha$ -N-Acetylarginine

$\beta$ -Guanidinopropionic  
Acid      —[607]

$\beta$ -Lipotropin

$\gamma$ -guanidinobutyric  
Acid      —[607]

---

—[607]

—[607]

## References.

1. Zhan, J.-K.; Wang, Y.-J.; Wang, Y.; Tang, Z.-Y.; Tan, P.; Huang, W.; Liu, Y.-S. Adiponectin attenuates the osteoblastic differentiation of vascular smooth muscle cells through the AMPK/mTOR pathway. *Exp. Cell Res.* **2014**, *323*, 352–358.
2. Zhan, J.-K.; Wang, Y.-J.; Wang, Y.; Wang, S.; Tan, P.; Huang, W.; Liu, Y.-S. The mammalian target of rapamycin signalling pathway is involved in osteoblastic differentiation of vascular smooth muscle cells. *Can. J. Cardiol.* **2014**, *30*, 568–575.
3. Son, B.-K.; Akishita, M.; Iijima, K.; Kozaki, K.; Maemura, K.; Eto, M.; Ouchi, Y. Adiponectin antagonizes stimulatory effect of tumor necrosis factor- $\alpha$  on vascular smooth muscle cell calcification: Regulation of growth arrest-specific gene 6-mediated survival pathway by adenosine 5'-monophosphate-activated protein kinase. *Endocrinology* **2008**, *149*, 1646–1653.
4. Niknam, S.; Ghatreh-Samani, K.; Farrokhi, E. The effect of adiponectin on osteonectin gene expression by oxidized low density lipoprotein-treated vascular smooth muscle cells. *Int. J. Mol. Cell. Med.* **2015**, *4*, 60–66.
5. Lu, Y.; Bian, Y.; Wang, Y.; Bai, R.; Wang, J.; Xiao, C. Globular adiponectin reduces vascular calcification via inhibition of ER-stress-mediated smooth muscle cell apoptosis. *Int. J. Clin. Exp. Pathol.* **2015**, *8*, 2545–2554.
6. Luo, X.-H.; Zhao, L.-L.; Yuan, L.-Q.; Wang, M.; Xie, H.; Liao, E.-Y. Development of arterial calcification in adiponectin-deficient mice: Adiponectin regulates arterial calcification. *J. Bone Miner. Res. Off. J. Am. Soc. Bone Miner. Res.* **2009**, *24*, 1461–1468.
7. Maahs, D.M.; Ogden, L.G.; Kinney, G.L.; Wadwa, P.; Snell-Bergeon, J.K.; Dabelea, D.; Hokanson, J.E.; Ehrlich, J.; Eckel, R.H.; Rewers, M. Low plasma adiponectin levels predict progression of coronary artery calcification. *Circulation* **2005**, *111*, 747–753.
8. Steffes, M.W.; Gross, M.D.; Lee, D.-H.; Schreiner, P.J.; Jacobs, D.R. Adiponectin, visceral fat, oxidative stress, and early macrovascular disease: The Coronary Artery Risk Development in Young Adults Study. *Obes. Silver Spring Md* **2006**, *14*, 319–326.
9. Tanna, N.; Patel, K.; Moore, A.E.; Dulnoan, D.; Edwards, S.; Hampson, G. The relationship between circulating adiponectin, leptin and vaspin with bone mineral density (BMD), arterial calcification and stiffness: A cross-sectional study in post-menopausal women. *J. Endocrinol. Invest.* **2017**, *40*, 1345–1353.
10. Aoqui, C.; Cuppari, L.; Kamimura, M.A.; Canziani, M.E.F. Increased visceral adiposity is associated with coronary artery calcification in male patients with chronic kidney disease. *Eur. J. Clin. Nutr.* **2013**, *67*, 610–614.
11. Larsen, B.A.; Laughlin, G.A.; Cummins, K.; Barrett-Connor, E.; Wassel, C.L. Adipokines and severity and progression of coronary artery calcium: Findings from the Rancho Bernardo Study. *Atherosclerosis* **2017**, *265*, 1–6.
12. Värri, M.; Niskanen, L.; Tuomainen, T.; Honkanen, R.; Kröger, H.; Tuppurainen, M.T. Association of adipokines and estradiol with bone and carotid calcifications in postmenopausal women. *Climacteric, J. Int. Menopause Soc.* **2016**, *19*, 204–211.
13. Hyun, Y.Y.; Kim, H.; Oh, Y.K.; Oh, K.-H.; Ahn, C.; Sung, S.A.; Choi, K.H.; Kim, S.W.; Lee, K.-B. High fibroblast growth factor 23 is associated with coronary calcification in patients with high adiponectin: Analysis from the KoreaN cohort study for Outcome in patients With Chronic Kidney Disease (KNOW-CKD) study. *Nephrol. Dial. Transplant. Off. Publ. Eur. Dial. Transpl. Assoc.—Eur. Ren. Assoc.* **2019**, *34*, 123–129.
14. Mehta, A.; Patel, J.; Al Rifai, M.; Ayers, C.R.; Neeland, I.J.; Kanaya, A.M.; Kandula, N.; Blaha, M.J.; Nasir, K.; Blumenthal, R.S.; et al. Inflammation and coronary artery calcification in South Asians: The Mediators of Atherosclerosis in South Asians Living in America (MASALA) study. *Atherosclerosis* **2018**, *270*, 49–56.
15. Ishihara, T.; Haraguchi, G.; Konishi, M.; Ohigashi, H.; Saito, K.; Nakano, Y.; Isobe, M. Effect of adiponectin on cardiac allograft vasculopathy. *Circ. J. Off. J. Jpn. Circ. Soc.* **2011**, *75*, 2005–2012.
16. Zhang, W.; Shu, C.; Li, Q.; Li, M.; Li, X. Adiponectin affects vascular smooth muscle cell proliferation and apoptosis through modulation of the mitofusin-2-mediated Ras-Raf-Erk1/2 signaling pathway. *Mol. Med. Rep.* **2015**, *12*, 4703–4707.
17. Luo, L.; Zheng, W.; Lian, G.; Chen, H.; Li, L.; Xu, C.; Xie, L. Combination treatment of adipose-derived stem cells and adiponectin attenuates pulmonary arterial hypertension in rats by inhibiting pulmonary arterial smooth muscle cell proliferation and regulating the AMPK/BMP/Smad pathway. *Int. J. Mol. Med.* **2018**, *41*, 51–60.

18. Fairaq, A.; Shawky, N.M.; Osman, I.; Pichavaram, P.; Segar, L. AdipoRon, an adiponectin receptor agonist, attenuates PDGF-induced VSMC proliferation through inhibition of mTOR signaling independent of AMPK: Implications toward suppression of neointimal hyperplasia. *Pharmacol. Res.* **2017**, *119*, 289–302.
19. Lamers, D.; Schlich, R.; Greulich, S.; Sasson, S.; Sell, H.; Eckel, J. Oleic acid and adipokines synergize in inducing proliferation and inflammatory signalling in human vascular smooth muscle cells. *J. Cell. Mol. Med.* **2011**, *15*, 1177–1188.
20. Arita, Y.; Kihara, S.; Ouchi, N.; Maeda, K.; Kuriyama, H.; Okamoto, Y.; Kumada, M.; Hotta, K.; Nishida, M.; Takahashi, M.; et al. Adipocyte-derived plasma protein adiponectin acts as a platelet-derived growth factor-BB-binding protein and regulates growth factor-induced common postreceptor signal in vascular smooth muscle cell. *Circulation* **2002**, *105*, 2893–2898.
21. Matsuda, M.; Shimomura, I.; Sata, M.; Arita, Y.; Nishida, M.; Maeda, N.; Kumada, M.; Okamoto, Y.; Nagaretani, H.; Nishizawa, H.; et al. Role of adiponectin in preventing vascular stenosis. The missing link of adipo-vascular axis. *J. Biol. Chem.* **2002**, *277*, 37487–37491.
22. Wang, Y.; Lam, K.S.L.; Xu, J.Y.; Lu, G.; Xu, L.Y.; Cooper, G.J.S.; Xu, A. Adiponectin inhibits cell proliferation by interacting with several growth factors in an oligomerization-dependent manner. *J. Biol. Chem.* **2005**, *280*, 18341–18347.
23. Weng, M.; Raheer, M.J.; Leyton, P.; Combs, T.P.; Scherer, P.E.; Bloch, K.D.; Medoff, B.D. Adiponectin decreases pulmonary arterial remodeling in murine models of pulmonary hypertension. *Am. J. Respir. Cell Mol. Biol.* **2011**, *45*, 340–347.
24. Fuerst, M.; Taylor, C.G.; Wright, B.; Tworek, L.; Zahradka, P. Inhibition of smooth muscle cell proliferation by adiponectin requires proteolytic conversion to its globular form. *J. Endocrinol.* **2012**, *215*, 107–117.
25. Motobayashi, Y.; Izawa-Ishizawa, Y.; Ishizawa, K.; Orino, S.; Yamaguchi, K.; Kawazoe, K.; Hamano, S.; Tsuchiya, K.; Tomita, S.; Tamaki, T. Adiponectin inhibits insulin-like growth factor-1-induced cell migration by the suppression of extracellular signal-regulated kinase 1/2 activation, but not Akt in vascular smooth muscle cells. *Hypertens. Res. Off. J. Jpn. Soc. Hypertens.* **2009**, *32*, 188–193.
26. Saneipour, M.; Ghatreh-Samani, K.; Heydarian, E.; Farrokhi, E.; Abdian, N. Adiponectin inhibits oxidized low density lipoprotein-induced increase in matrix metalloproteinase 9 expression in vascular smooth muscle cells. *ARYA Atheroscler.* **2015**, *11*, 191–195.
27. Okamoto, Y.; Kihara, S.; Ouchi, N.; Nishida, M.; Arita, Y.; Kumada, M.; Ohashi, K.; Sakai, N.; Shimomura, I.; Kobayashi, H.; et al. Adiponectin reduces atherosclerosis in apolipoprotein E-deficient mice. *Circulation* **2002**, *106*, 2767–2770.
28. Cai, Y.; Teng, X.; Pan, C.; Duan, X.; Tang, C.; Qi, Y. Adrenomedullin up-regulates osteopontin and attenuates vascular calcification via the cAMP/PKA signaling pathway. *Acta Pharmacol. Sin.* **2010**, *31*, 1359–1366.
29. Huang, Z.; Li, J.; Jiang, Z.; Qi, Y.; Tang, C.; Du, J. Effects of adrenomedullin, C-type natriuretic peptide, and parathyroid hormone-related peptide on calcification in cultured rat vascular smooth muscle cells. *J. Cardiovasc. Pharmacol.* **2003**, *42*, 89–97.
30. Zhou, Y.-B.; Gao, Q.; Li, P.; Han, Y.; Zhang, F.; Qi, Y.-F.; Tang, C.-S.; Gao, X.-Y.; Zhu, G.-Q. Adrenomedullin attenuates vascular calcification in fructose-induced insulin resistance rats. *Acta Physiol. Oxf. Engl.* **2013**, *207*, 437–446.
31. Liu, J.; Shimosawa, T.; Matsui, H.; Meng, F.; Supowit, S.C.; DiPette, D.J.; Ando, K.; Fujita, T. Adrenomedullin inhibits angiotensin II-induced oxidative stress via Csk-mediated inhibition of Src activity. *Am. J. Physiol. Heart Circ. Physiol.* **2007**, *292*, H1714–H1721.
32. Yoshimoto, T.; Fukai, N.; Sato, R.; Sugiyama, T.; Ozawa, N.; Shichiri, M.; Hirata, Y. Antioxidant effect of adrenomedullin on angiotensin II-induced reactive oxygen species generation in vascular smooth muscle cells. *Endocrinology* **2004**, *145*, 3331–3337.
33. Shichiri, M.; Fukai, N.; Ozawa, N.; Iwasaki, H.; Hirata, Y. Adrenomedullin is an autocrine/paracrine growth factor for rat vascular smooth muscle cells. *Regul. Pept.* **2003**, *112*, 167–173.
34. Iwasaki, H.; Eguchi, S.; Shichiri, M.; Marumo, F.; Hirata, Y. Adrenomedullin as a novel growth-promoting factor for cultured vascular smooth muscle cells: Role of tyrosine kinase-mediated mitogen-activated protein kinase activation. *Endocrinology* **1998**, *139*, 3432–3441.

35. Kano, H.; Kohno, M.; Yasunari, K.; Yokokawa, K.; Horio, T.; Ikeda, M.; Minami, M.; Hanehira, T.; Takeda, T.; Yoshikawa, J. Adrenomedullin as a novel antiproliferative factor of vascular smooth muscle cells. *J. Hypertens.* **1996**, *14*, 209–213.
36. Rossi, F.; Bertone, C.; Petricca, S.; Santemma, V. Adrenomedullin antagonizes angiotensin II-stimulated proliferation of human aortic smooth muscle cells. *Peptides* **2006**, *27*, 2935–2941.
37. Ma, J.; Feng, Y.; Li, Z.; Tang, C. The effect of adrenomedullin and proadrenomedullin N-terminal 20 peptide on angiotensin II induced vascular smooth muscle cell proliferation. *Iran. J. Basic Med. Sci.* **2016**, *19*, 49–54.
38. Li, W.; Kong, Q.Y.; Zhao, C.F.; Zhao, F.; Li, F.H.; Xia, W.; Wang, R.; Hu, Y.M.; Hua, M. Adrenomedullin and adrenotensin regulate collagen synthesis and proliferation in pulmonary arterial smooth muscle cells. *Braz. J. Med. Biol. Res. Rev. Bras. Pesqui. Medicas E Biol.* **2013**, *46*, 1047–1055.
39. Wang, X.; Xue, L.; Tong, L. [Influence of vasoactive peptides on homocysteine-induced proliferation of cultured rabbit vascular smooth muscle cell]. *Zhonghua Yi Xue Za Zhi* **1999**, *79*, 411–413.
40. Li, C.; Dai, A.; Huang, C. [Effects of adrenomedullin regulating inducible nitric oxide synthase on proliferation and apoptosis in hypoxic pulmonary artery smooth muscle cells]. *Zhongguo Ying Yong Sheng Li Xue Za Zhi Zhongguo Yingyong Shenglixue Zazhi Chin. J. Appl. Physiol.* **2005**, *21*, 187–191.
41. Jiang, W.; Yang, J.-H.; Pan, C.-S.; Qi, Y.-F.; Pang, Y.-Z.; Tang, C.-S. Effects of adrenomedullin on cell proliferation in rat adventitia induced by aldosterone. *J. Hypertens.* **2004**, *22*, 1953–1961.
42. Kohno, M.; Yokokawa, K.; Kano, H.; Yasunari, K.; Minami, M.; Hanehira, T.; Yoshikawa, J. Adrenomedullin is a potent inhibitor of angiotensin II-induced migration of human coronary artery smooth muscle cells. *Hypertens. Dallas Tex 1979* **1997**, *29*, 1309–1313.
43. Horio, T.; Kohno, M.; Kano, H.; Ikeda, M.; Yasunari, K.; Yokokawa, K.; Minami, M.; Takeda, T. Adrenomedullin as a novel antimigration factor of vascular smooth muscle cells. *Circ. Res.* **1995**, *77*, 660–664.
44. Fukai, N.; Shichiri, M.; Ozawa, N.; Matsushita, M.; Hirata, Y. Coexpression of calcitonin receptor-like receptor and receptor activity-modifying protein 2 or 3 mediates the antimigratory effect of adrenomedullin. *Endocrinology* **2003**, *144*, 447–453.
45. Gáll, T.; Pethő, D.; Nagy, A.; Hendrik, Z.; Méhes, G.; Potor, L.; Gram, M.; Åkerström, B.; Smith, A.; Nagy, P.; et al. Heme Induces Endoplasmic Reticulum Stress (HIER Stress) in Human Aortic Smooth Muscle Cells. *Front. Physiol.* **2018**, *9*, 1595.
46. De Vito, P.; Di Nardo, P.; Palmery, M.; Peluso, I.; Luly, P.; Baldini, P.M. Oxidant-induced pHi/Ca<sup>2+</sup> changes in rat aortic smooth muscle cells. The role of atrial natriuretic peptide. *Mol. Cell. Biochem.* **2003**, *252*, 353–362.
47. Madiraju, P.; Hossain, E.; Anand-Srivastava, M.B. Natriuretic peptide receptor-C activation attenuates angiotensin II-induced enhanced oxidative stress and hyperproliferation of aortic vascular smooth muscle cells. *Mol. Cell. Biochem.* **2018**, *448*, 77–89.
48. Deprez, I.; Darmon, M.E.; Hira, M.; Adam, M.; Sanquer, S.; Teiger, E.; Chetboul, V.; Eloit, M.; Adnot, S.; Pham, I. Adenovirus-mediated transfer of the atrial natriuretic peptide gene in rat pulmonary vascular smooth muscle cells leads to apoptosis. *J. Lab. Clin. Med.* **2001**, *137*, 155–164.
49. Mtaïrag, E.M.; Houard, X.; Rais, S.; Pasquier, C.; Oudghiri, M.; Jacob, M.-P.; Meilhac, O.; Michel, J.-B. Pharmacological potentiation of natriuretic peptide limits polymorphonuclear neutrophil-vascular cell interactions. *Arterioscler. Thromb. Vasc. Biol.* **2002**, *22*, 1824–1831.
50. Larifla, L.; Déprez, I.; Pham, I.; Rideau, D.; Louzier, V.; Adam, M.; Eloit, M.; Foucan, L.; Adnot, S.; Teiger, E. Inhibition of vascular smooth muscle cell proliferation and migration in vitro and neointimal hyperplasia in vivo by adenoviral-mediated atrial natriuretic peptide delivery. *J. Gene Med.* **2012**, *14*, 459–467.
51. Arjona, A.A.; Hsu, C.A.; Wrenn, D.S.; Hill, N.S. Effects of natriuretic peptides on vascular smooth-muscle cells derived from different vascular beds. *Gen. Pharmacol.* **1997**, *28*, 387–392.
52. Itoh, H.; Pratt, R.E.; Dzau, V.J. Atrial natriuretic polypeptide inhibits hypertrophy of vascular smooth muscle cells. *J. Clin. Invest.* **1990**, *86*, 1690–1697.
53. Rybalkin, S.D.; Yan, C.; Bornfeldt, K.E.; Beavo, J.A. Cyclic GMP phosphodiesterases and regulation of smooth muscle function. *Circ. Res.* **2003**, *93*, 280–291.
54. Hashim, S.; Li, Y.; Anand-Srivastava, M.B. Small cytoplasmic domain peptides of natriuretic peptide receptor-C attenuate cell proliferation through G $\alpha$  protein/MAP kinase/PI3-kinase/AKT pathways. *Am. J. Physiol. Heart Circ. Physiol.* **2006**, *291*, H3144–H3153.

55. Dhaunsi, G.S.; Hassid, A. Atrial and C-type natriuretic peptides amplify growth factor activity in primary aortic smooth muscle cells. *Cardiovasc. Res.* **1996**, *31*, 37–47.
56. Awazu, M. Inhibition of platelet-derived growth factor receptor tyrosine kinase by atrial natriuretic peptide. *Kidney Int.* **1997**, *52*, 356–362.
57. Neuser, D.; Stasch, J.P.; Knorr, A.; Kazda, S. Inhibition by atrial natriuretic peptide of endothelin-1-stimulated proliferation of vascular smooth-muscle cells. *J. Cardiovasc. Pharmacol.* **1993**, *22 Suppl 8*, S257–261.
58. Itoh, H.; Nakao, K. Antagonism between the vascular renin-angiotensin and natriuretic peptide systems in vascular remodelling. *Blood Pressure. Supplement* **1994**, *5*, 49–53.
59. Hamad, A.M.; Johnson, S.R.; Knox, A.J. Antiproliferative effects of NO and ANP in cultured human airway smooth muscle. *Am. J. Physiol.* **1999**, *277*, L910–L918.
60. Wu, J.M.; Cheng, T.; Sun, S.D.; Niu, D.D.; Zhang, J.X.; Wang, S.H.; Tang, J.; Tang, C.S. Effect of endothelin, angiotensin II and ANP on proliferation of vascular smooth muscle cells and cardiomyocytes. *Sci. China B* **1993**, *36*, 948–953.
61. Wu, J.M.; Sun, S.D.; Liao, Y.B.; Tang, C.S. [Effect of ANP on angiotensin II--stimulated multiplication and c-fos oncogene expression of SHR vascular smooth muscle cells]. *Sheng Li Xue Bao* **1992**, *44*, 181–185.
62. Hirata, K.; Akita, H.; Yokoyama, M.; Watanabe, Y. Impaired vasodilatory response to atrial natriuretic peptide during atherosclerosis progression. *Arterioscler. Thromb. J. Vasc. Biol.* **1992**, *12*, 99–105.
63. Kariya, K.; Kawahara, Y.; Araki, S.; Fukuzaki, H.; Takai, Y. Antiproliferative action of cyclic GMP-elevating vasodilators in cultured rabbit aortic smooth muscle cells. *Atherosclerosis* **1989**, *80*, 143–147.
64. Dong, M.Q.; Zhu, M.Z.; Yu, J.; Shang, L.J.; Feng, H.S. [Comparison of inhibitory effects of three natriuretic peptides on the proliferation of pulmonary artery smooth muscle cells of rats]. *Sheng Li Xue Bao* **2000**, *52*, 252–254.
65. Ikeda, M.; Kohno, M.; Yasunari, K.; Yokokawa, K.; Horio, T.; Ueda, M.; Morisaki, N.; Yoshikawa, J. Natriuretic peptide family as a novel antimigration factor of vascular smooth muscle cells. *Arterioscler. Thromb. Vasc. Biol.* **1997**, *17*, 731–736.
66. Kohno, M.; Yokokawa, K.; Yasunari, K.; Kano, H.; Minami, M.; Ueda, M.; Yoshikawa, J. Effect of natriuretic peptide family on the oxidized LDL-induced migration of human coronary artery smooth muscle cells. *Circ. Res.* **1997**, *81*, 585–590.
67. Schröder, K.; Helmcke, I.; Palfi, K.; Krause, K.-H.; Busse, R.; Brandes, R.P. Nox1 mediates basic fibroblast growth factor-induced migration of vascular smooth muscle cells. *Arterioscler. Thromb. Vasc. Biol.* **2007**, *27*, 1736–1743.
68. Peluso, J.J. Basic fibroblast growth factor (bFGF) regulation of the plasma membrane calcium ATPase (PMCA) as part of an anti-apoptotic mechanism of action. *Biochem. Pharmacol.* **2003**, *66*, 1363–1369.
69. Ye, G.; Fu, Q.; Jiang, L.; Li, Z. Vascular smooth muscle cells activate PI3K/Akt pathway to attenuate myocardial ischemia/reperfusion-induced apoptosis and autophagy by secreting bFGF. *Biomed. Pharmacother. Biomedicine Pharmacother.* **2018**, *107*, 1779–1785.
70. Miyamoto, T.; Leconte, I.; Swain, J.L.; Fox, J.C. Autocrine FGF signaling is required for vascular smooth muscle cell survival in vitro. *J. Cell. Physiol.* **1998**, *177*, 58–67.
71. Fox, J.C.; Shanley, J.R. Antisense inhibition of basic fibroblast growth factor induces apoptosis in vascular smooth muscle cells. *J. Biol. Chem.* **1996**, *271*, 12578–12584.
72. Li, R.; Cindrova-Davies, T.; Skepper, J.N.; Sellers, L.A. Prostacyclin induces apoptosis of vascular smooth muscle cells by a cAMP-mediated inhibition of extracellular signal-regulated kinase activity and can counteract the mitogenic activity of endothelin-1 or basic fibroblast growth factor. *Circ. Res.* **2004**, *94*, 759–767.
73. Liang, M.; He, L. Inhibitory effects of ligustilide and butylidenephthalide on bFGF-stimulated proliferation of rat smooth muscle cells. *Yao Xue Xue Bao* **2006**, *41*, 161–165.
74. Inoue, Y.; King, T.E.; Barker, E.; Daniloff, E.; Newman, L.S. Basic fibroblast growth factor and its receptors in idiopathic pulmonary fibrosis and lymphangioliomyomatosis. *Am. J. Respir. Crit. Care Med.* **2002**, *166*, 765–773.
75. Yu, D.; Rui, X.; He, S. Effect of heparin-derived oligosaccharide on bFGFR1 and bFGFR2 in vascular smooth muscle cells. *Vasc. Endovascular Surg.* **2014**, *48*, 289–296.
76. Millette, E.; Rauch, B.H.; Defawe, O.; Kenagy, R.D.; Daum, G.; Clowes, A.W. Platelet-derived growth factor-BB-induced human smooth muscle cell proliferation depends on basic FGF release and FGFR-1 activation. *Circ. Res.* **2005**, *96*, 172–179.

77. Wang, Z.; Rao, P.J.; Shillcutt, S.D.; Newman, W.H. Angiotensin II induces proliferation of human cerebral artery smooth muscle cells through a basic fibroblast growth factor (bFGF) dependent mechanism. *Neurosci. Lett.* **2005**, *373*, 38–41.
78. Rauch, B.H.; Millette, E.; Kenagy, R.D.; Daum, G.; Fischer, J.W.; Clowes, A.W. Syndecan-4 is required for thrombin-induced migration and proliferation in human vascular smooth muscle cells. *J. Biol. Chem.* **2005**, *280*, 17507–17511.
79. DeLong, S.A.; Moon, J.J.; West, J.L. Covalently immobilized gradients of bFGF on hydrogel scaffolds for directed cell migration. *Biomaterials* **2005**, *26*, 3227–3234.
80. Herbert, J.M.; Bono, F.; Savi, P. The mitogenic effect of H<sub>2</sub>O<sub>2</sub> for vascular smooth muscle cells is mediated by an increase of the affinity of basic fibroblast growth factor for its receptor. *FEBS Lett.* **1996**, *395*, 43–47.
81. Hoshi, S.; Goto, M.; Koyama, N.; Nomoto, K.; Tanaka, H. Regulation of vascular smooth muscle cell proliferation by nuclear factor-kappaB and its inhibitor, I-kappaB. *J. Biol. Chem.* **2000**, *275*, 883–889.
82. Myler, H.A.; West, J.L. Heparanase and platelet factor-4 induce smooth muscle cell proliferation and migration via bFGF release from the ECM. *J. Biochem. (Tokyo)* **2002**, *131*, 913–922.
83. Huang, S.L.; Ding, B.; Li, J.; Yu, Q.S.; Guo, Z.G. Antisense Ca<sup>2+</sup>-calmodulin dependent protein kinase oligonucleotide inhibits bFGF-induced proliferation of rat vascular smooth muscle cells. *Acta Pharmacol. Sin.* **2000**, *21*, 229–233.
84. Segev, A.; Aviezer, D.; Safran, M.; Gross, Z.; Yayon, A. Inhibition of vascular smooth muscle cell proliferation by a novel fibroblast growth factor receptor antagonist. *Cardiovasc. Res.* **2002**, *53*, 232–241.
85. Zou, H.; Nie, X.; Zhang, Y.; Hu, M.; Zhang, Y.A. Effect of basic fibroblast growth factor on the proliferation, migration and phenotypic modulation of airway smooth muscle cells. *Chin. Med. J. (Engl.)* **2008**, *121*, 424–429.
86. Lindner, V.; Reidy, M.A. Expression of basic fibroblast growth factor and its receptor by smooth muscle cells and endothelium in injured rat arteries. An en face study. *Circ. Res.* **1993**, *73*, 589–595.
87. Hoshina, K.; Koyama, H.; Miyata, T.; Shigematsu, H.; Takato, T.; Dalman, R.L.; Nagawa, H. Aortic wall cell proliferation via basic fibroblast growth factor gene transfer limits progression of experimental abdominal aortic aneurysm. *J. Vasc. Surg.* **2004**, *40*, 512–518.
88. Kennedy, S.H.; Rouda, S.; Qin, H.; Aho, S.; Selber, J.; Tan, E.M. Basic FGF regulates interstitial collagenase gene expression in human smooth muscle cells. *J. Cell. Biochem.* **1997**, *65*, 32–41.
89. Olson, N.E.; Chao, S.; Lindner, V.; Reidy, M.A. Intimal smooth muscle cell proliferation after balloon catheter injury. The role of basic fibroblast growth factor. *Am. J. Pathol.* **1992**, *140*, 1017–1023.
90. Liu, W.; Parikh, A.A.; Stoeltzing, O.; Fan, F.; McCarty, M.F.; Wey, J.; Hicklin, D.J.; Ellis, L.M. Upregulation of neuropilin-1 by basic fibroblast growth factor enhances vascular smooth muscle cell migration in response to VEGF. *Cytokine* **2005**, *32*, 206–212.
91. Kenagy, R.D.; Hart, C.E.; Stetler-Stevenson, W.G.; Clowes, A.W. Primate smooth muscle cell migration from aortic explants is mediated by endogenous platelet-derived growth factor and basic fibroblast growth factor acting through matrix metalloproteinases 2 and 9. *Circulation* **1997**, *96*, 3555–3560.
92. Alfke, H.; Kleb, B.; Klose, K.J. Nitric oxide inhibits the basic fibroblast growth factor-stimulated migration of bovine vascular smooth muscle cells in vitro. *VASA Z. Gefasskrankheiten* **2000**, *29*, 99–102.
93. Kato, Y.; Yokoyama, U.; Fujita, T.; Umemura, M.; Kubota, T.; Ishikawa, Y. Epac1 deficiency inhibits basic fibroblast growth factor-mediated vascular smooth muscle cell migration. *J. Physiol. Sci. JPS* **2019**, *69*, 175–184.
94. Jackson, C.L.; Reidy, M.A. Basic fibroblast growth factor: Its role in the control of smooth muscle cell migration. *Am. J. Pathol.* **1993**, *143*, 1024–1031.
95. Irani, C.; Goncharova, E.A.; Hunter, D.S.; Walker, C.L.; Panettieri, R.A.; Krymskaya, V.P. Phosphatidylinositol 3-kinase but not tuberlin is required for PDGF-induced cell migration. *Am. J. Physiol. Lung Cell. Mol. Physiol.* **2002**, *282*, L854–L862.
96. Wu, J.; Mao, Z.; Hong, Y.; Han, L.; Gao, C. Conjugation of basic fibroblast growth factor on a heparin gradient for regulating the migration of different types of cells. *Bioconjug. Chem.* **2013**, *24*, 1302–1313.
97. Kohno, M.; Yokokawa, K.; Yasunari, K.; Minami, M.; Kano, H.; Hanehira, T.; Yoshikawa, J. Induction by lysophosphatidylcholine, a major phospholipid component of atherogenic lipoproteins, of human coronary artery smooth muscle cell migration. *Circulation* **1998**, *98*, 353–359.

98. Huang, Y.-H.; Wu, M.-P.; Pan, S.-C.; Su, W.-C.; Chen, Y.-W.; Wu, L.-W. STAT1 activation by venous malformations mutant Tie2-R849W antagonizes VEGF-A-mediated angiogenic response partly via reduced bFGF production. *Angiogenesis* **2013**, *16*, 207–222.
99. Wu, J.; Mao, Z.; Han, L.; Zhao, Y.; Xi, J.; Gao, C. A density gradient of basic fibroblast growth factor guides directional migration of vascular smooth muscle cells. *Colloids Surf. B Biointerfaces* **2014**, *117*, 290–295.
100. Six, I.; Mouquet, F.; Corseaux, D.; Bordet, R.; Letourneau, T.; Vallet, B.; Dosquet, C.C.; Dupuis, B.; Jude, B.; Bertrand, M.E.; et al. Protective effects of basic fibroblast growth factor in early atherosclerosis. *Growth Factors Chur Switz.* **2004**, *22*, 157–167.
101. Schaeffer, C.; Thomassin, L.; Rochette, L.; Connat, J.L. Apoptosis induced in vascular smooth muscle cells by oxidative stress is partly prevented by pretreatment with CGRP. *Ann. N. Y. Acad. Sci.* **2003**, *1010*, 733–737.
102. Yang, L.; Sakurai, T.; Kamiyoshi, A.; Ichikawa-Shindo, Y.; Kawate, H.; Yoshizawa, T.; Koyama, T.; Iesato, Y.; Uetake, R.; Yamauchi, A.; et al. Endogenous CGRP protects against neointimal hyperplasia following wire-induced vascular injury. *J. Mol. Cell. Cardiol.* **2013**, *59*, 55–66.
103. Zeng, S.-Y.; Yang, L.; Hong, C.-L.; Lu, H.-Q.; Yan, Q.-J.; Chen, Y.; Qin, X.-P. Evidence That ADAM17 Mediates the Protective Action of CGRP against Angiotensin II-Induced Inflammation in Vascular Smooth Muscle Cells. *Mediators Inflamm.* **2018**, *2018*, 2109352.
104. Wang, W.; Sun, W.; Wang, X. Intramuscular gene transfer of CGRP inhibits neointimal hyperplasia after balloon injury in the rat abdominal aorta. *Am. J. Physiol. Heart Circ. Physiol.* **2004**, *287*, H1582–H1589.
105. Schaeffer, C.; Vandroux, D.; Thomassin, L.; Athias, P.; Rochette, L.; Connat, J.-L. Calcitonin gene-related peptide partly protects cultured smooth muscle cells from apoptosis induced by an oxidative stress via activation of ERK1/2 MAPK. *Biochim. Biophys. Acta* **2003**, *1643*, 65–73.
106. Connat, J.L.; Schnüriger, V.; Zandone, R.; Schaeffer, C.; Gaillard, M.; Faivre, B.; Rochette, L. The neuropeptide calcitonin gene-related peptide differently modulates proliferation and differentiation of smooth muscle cells in culture depending on the cell type. *Regul. Pept.* **2001**, *101*, 169–178.
107. Li, X.-W.; Hu, C.-P.; Wu, W.-H.; Zhang, W.-F.; Zou, X.-Z.; Li, Y.-J. Inhibitory effect of calcitonin gene-related peptide on hypoxia-induced rat pulmonary artery smooth muscle cells proliferation: Role of ERK1/2 and p27. *Eur. J. Pharmacol.* **2012**, *679*, 117–126.
108. Qin, X.-P.; Ye, F.; Hu, C.-P.; Liao, D.-F.; Deng, H.-W.; Li, Y.-J. Effect of calcitonin gene-related peptide on angiotensin II-induced proliferation of rat vascular smooth muscle cells. *Eur. J. Pharmacol.* **2004**, *488*, 45–49.
109. Li, Y.; Fiscus, R.R.; Wu, J.; Yang, L.; Wang, X. The antiproliferative effects of calcitonin gene-related peptide in different passages of cultured vascular smooth muscle cells. *Neuropeptides* **1997**, *31*, 503–509.
110. Fang, L.; Chen, M.-F.; Xiao, Z.-L.; Liu, Y.; Yu, G.-L.; Chen, X.-B.; Xie, X.-M. Calcitonin gene-related peptide released from endothelial progenitor cells inhibits the proliferation of rat vascular smooth muscle cells induced by angiotensin II. *Mol. Cell. Biochem.* **2011**, *355*, 99–108.
111. Shi, B.; Cui, C.; Long, X.; Chen, W.; Zhao, R.; Liu, Z.; Ao, Z. [Effects of CGRP and CGRP receptor modified mesenchymal stem cells on proliferation and phenotypic transformation of vascular smooth muscle cells]. *Zhonghua Yi Xue Za Zhi* **2013**, *93*, 2372–2376.
112. Shi, B.; Chen, P.; Long, X.; Zhao, R.; Deng, W. [Role of CGRP modified mesenchymal stem cells in restenosis in rat model with carotid angioplasty]. *Zhonghua Yi Xue Za Zhi* **2015**, *95*, 1619–1624.
113. Long, X.; Cui, C.; Chen, P.; Wang, S.; Wang, D.; Xu, G.; Yao, X.; Shi, B. [Impact and related mechanism of exogenous receptor activity modifying protein 1 on calcitonin gene-related peptide modified bone marrow mesenchymal stem cells on the migration of vascular smooth muscle cells in vitro]. *Zhonghua Xin Xue Guan Bing Za Zhi* **2015**, *43*, 537–541.
114. Saia, R.S.; Bertozzi, G.; Mestriner, F.L.; Antunes-Rodrigues, J.; Queiróz Cunha, F.; Cárnio, E.C. Cardiovascular and inflammatory response to cholecystokinin during endotoxemic shock. *Shock Augusta Ga* **2013**, *39*, 104–113.
115. Schulte, S.; Sun, J.; Libby, P.; Macfarlane, L.; Sun, C.; Lopez-Illasaca, M.; Shi, G.-P.; Sukhova, G.K. Cystatin C deficiency promotes inflammation in angiotensin II-induced abdominal aortic aneurysms in atherosclerotic mice. *Am. J. Pathol.* **2010**, *177*, 456–463.
116. Cheng, X.W.; Kuzuya, M.; Nakamura, K.; Di, Q.; Liu, Z.; Sasaki, T.; Kanda, S.; Jin, H.; Shi, G.-P.; Murohara, T.; et al. Localization of cysteine protease, cathepsin S, to the surface of vascular smooth muscle cells by association with integrin  $\alpha$ 5 $\beta$ 3. *Am. J. Pathol.* **2006**, *168*, 685–694.

117. Sukhova, G.K.; Wang, B.; Libby, P.; Pan, J.-H.; Zhang, Y.; Grubb, A.; Fang, K.; Chapman, H.A.; Shi, G.-P. Cystatin C deficiency increases elastic lamina degradation and aortic dilatation in apolipoprotein E-null mice. *Circ. Res.* **2005**, *96*, 368–375.
118. Shi, G.P.; Sukhova, G.K.; Grubb, A.; Ducharme, A.; Rhode, L.H.; Lee, R.T.; Ridker, P.M.; Libby, P.; Chapman, H.A. Cystatin C deficiency in human atherosclerosis and aortic aneurysms. *J. Clin. Invest.* **1999**, *104*, 1191–1197.
119. Wu, S.Y.; Zhang, B.H.; Pan, C.S.; Jiang, H.F.; Pang, Y.Z.; Tang, C.S.; Qi, Y.F. Endothelin-1 is a potent regulator in vivo in vascular calcification and in vitro in calcification of vascular smooth muscle cells. *Peptides* **2003**, *24*, 1149–1156.
120. Essalihi, R.; Ouellette, V.; Dao, H.H.; McKee, M.D.; Moreau, P. Phenotypic modulation of vascular smooth muscle cells during medial arterial calcification: A role for endothelin? *J. Cardiovasc. Pharmacol.* **2004**, *44 Suppl 1*, S147–150.
121. Larivière, R.; Gauthier-Bastien, A.; Ung, R.-V.; St-Hilaire, J.; Mac-Way, F.; Richard, D.E.; Agharazii, M. Endothelin type A receptor blockade reduces vascular calcification and inflammation in rats with chronic kidney disease. *J. Hypertens.* **2017**, *35*, 376–384.
122. Wang, F.; Li, T.; Cong, X.; Hou, Z.; Lu, B.; Zhou, Z.; Chen, X. The Value of Big Endothelin-1 in the Assessment of the Severity of Coronary Artery Calcification. *Clin. Appl. Thromb. Off. J. Int. Acad. Clin. Appl. Thromb.* **2018**, *24*, 1042–1049.
123. Qing, P.; Li, X.-L.; Zhang, Y.; Li, Y.-L.; Xu, R.-X.; Guo, Y.-L.; Li, S.; Wu, N.-Q.; Li, J.-J. Association of Big Endothelin-1 with Coronary Artery Calcification. *PLoS ONE* **2015**, *10*, e0142458.
124. Rebić, D.; Rašić, S.; Hamzić-Mehmedbašić, A.; Džemidžić, J.; Kurtalić, E. Valvular calcification and left ventricular modifying in peritoneal dialysis patients. *Ren. Fail.* **2015**, *37*, 1316–1322.
125. Wedgwood, S.; Dettman, R.W.; Black, S.M. ET-1 stimulates pulmonary arterial smooth muscle cell proliferation via induction of reactive oxygen species. *Am. J. Physiol. Lung Cell. Mol. Physiol.* **2001**, *281*, L1058–L1067.
126. Idris-Khodja, N.; Ouerd, S.; Trindade, M.; Gornitsky, J.; Rehman, A.; Barhoumi, T.; Offermanns, S.; Gonzalez, F.J.; Neves, M.F.; Paradis, P.; et al. Vascular smooth muscle cell peroxisome proliferator-activated receptor  $\gamma$  protects against endothelin-1-induced oxidative stress and inflammation. *J. Hypertens.* **2017**, *35*, 1390–1401.
127. Trindade, M.; Oigman, W.; Fritsch Neves, M. Potential Role of Endothelin in Early Vascular Aging. *Curr. Hypertens. Rev.* **2017**, *13*, 33–40.
128. Ivey, M.E.; Osman, N.; Little, P.J. Endothelin-1 signalling in vascular smooth muscle: Pathways controlling cellular functions associated with atherosclerosis. *Atherosclerosis* **2008**, *199*, 237–247.
129. He, J.; Yi, B.; Chen, Y.; Huang, Q.; Wang, H.; Lu, K.; Fu, W. The ET-1-mediated carbonylation and degradation of ANXA1 induce inflammatory phenotype and proliferation of pulmonary artery smooth muscle cells in HPS. *PLoS ONE* **2017**, *12*, e0175443.
130. Yeager, M.E.; Belchenko, D.D.; Nguyen, C.M.; Colvin, K.L.; Ivy, D.D.; Stenmark, K.R. Endothelin-1, the unfolded protein response, and persistent inflammation: Role of pulmonary artery smooth muscle cells. *Am. J. Respir. Cell Mol. Biol.* **2012**, *46*, 14–22.
131. Lin, C.-C.; Lin, W.-N.; Hou, W.-C.; Hsiao, L.-D.; Yang, C.-M. Endothelin-1 induces VCAM-1 expression-mediated inflammation via receptor tyrosine kinases and Elk/p300 in human tracheal smooth muscle cells. *Am. J. Physiol. Lung Cell. Mol. Physiol.* **2015**, *309*, L211–L225.
132. Knobloch, J.; Feldmann, M.; Wahl, C.; Jungck, D.; Behr, J.; Stoelben, E.; Koch, A. Endothelin receptor antagonists attenuate the inflammatory response of human pulmonary vascular smooth muscle cells to bacterial endotoxin. *J. Pharmacol. Exp. Ther.* **2013**, *346*, 290–299.
133. Anggrahini, D.W.; Emoto, N.; Nakayama, K.; Widiantoro, B.; Adiarto, S.; Iwasa, N.; Nonaka, H.; Rikitake, Y.; Kisanuki, Y.Y.; Yanagisawa, M.; et al. Vascular endothelial cell-derived endothelin-1 mediates vascular inflammation and neointima formation following blood flow cessation. *Cardiovasc. Res.* **2009**, *82*, 143–151.
134. Kim, F.Y.; Barnes, E.A.; Ying, L.; Chen, C.; Lee, L.; Alvira, C.M.; Cornfield, D.N. Pulmonary artery smooth muscle cell endothelin-1 expression modulates the pulmonary vascular response to chronic hypoxia. *Am. J. Physiol. Lung Cell. Mol. Physiol.* **2015**, *308*, L368–L377.
135. Dai, F.; Mao, Z.; Xia, J.; Zhu, S.; Wu, Z. Fluoxetine protects against big endothelin-1 induced anti-apoptosis by rescuing Kv1.5 channels in human pulmonary arterial smooth muscle cells. *Yonsei Med. J.* **2012**, *53*, 842–848.
136. Little, P.J.; Ivey, M.E.; Osman, N. Endothelin-1 actions on vascular smooth muscle cell functions as a target for the prevention of atherosclerosis. *Curr. Vasc. Pharmacol.* **2008**, *6*, 195–203.



137. Sihvola, R.K.; Pulkkinen, V.P.; Koskinen, P.K.; Lemström, K.B. Crosstalk of endothelin-1 and platelet-derived growth factor in cardiac allograft arteriosclerosis. *J. Am. Coll. Cardiol.* **2002**, *39*, 710–717.
138. Lu, M.-H.; Chao, C.-F.; Tsai, S.-H.; Chen, J.-Y.; Chang, L.-T. Autocrine effects of endothelin on in vitro proliferation of vascular smooth muscle cells from spontaneously hypertensive and normotensive rats. *Clin. Exp. Hypertens. N. Y. N* **1993** **2006**, *28*, 463–474.
139. Wort, S.J.; Woods, M.; Warner, T.D.; Evans, T.W.; Mitchell, J.A. Endogenously released endothelin-1 from human pulmonary artery smooth muscle promotes cellular proliferation: Relevance to pathogenesis of pulmonary hypertension and vascular remodeling. *Am. J. Respir. Cell Mol. Biol.* **2001**, *25*, 104–110.
140. Tanaka, Y.; Makiyama, Y.; Mitsui, Y. Endothelin-1 is involved in the growth promotion of vascular smooth muscle cells by hyaluronic acid. *Int. J. Cardiol.* **2000**, *76*, 39–47.
141. Ljuca, F.; Drevensek, G. Endothelin-1 induced vascular smooth muscle cell proliferation is mediated by cytochrome p-450 arachidonic acid metabolites. *Bosn. J. Basic Med. Sci.* **2010**, *10*, 223–226.
142. Chen, S.; Qiong, Y.; Gardner, D.G. A role for p38 mitogen-activated protein kinase and c-myc in endothelin-dependent rat aortic smooth muscle cell proliferation. *Hypertens. Dallas Tex 1979* **2006**, *47*, 252–258.
143. Lin, Y.-J.; Juan, C.-C.; Kwok, C.-F.; Hsu, Y.-P.; Shih, K.-C.; Chen, C.-C.; Ho, L.-T. Endothelin-1 exacerbates development of hypertension and atherosclerosis in modest insulin resistant syndrome. *Biochem. Biophys. Res. Commun.* **2015**, *460*, 497–503.
144. Sauter, G.; Wolf, S.; Risler, T.; Brehm, B. Influence of endothelin receptor antagonism on smooth muscle cell proliferation after chronic renal failure. *J. Cardiovasc. Pharmacol.* **2004**, *44 Suppl 1*, S165-167.
145. Janakidevi, K.; Fisher, M.A.; Del Vecchio, P.J.; Tirupathi, C.; Figge, J.; Malik, A.B. Endothelin-1 stimulates DNA synthesis and proliferation of pulmonary artery smooth muscle cells. *Am. J. Physiol.* **1992**, *263*, C1295–C1301.
146. Bouallegue, A.; Vardatsikos, G.; Srivastava, A.K. Role of insulin-like growth factor 1 receptor and c-Src in endothelin-1- and angiotensin II-induced PKB phosphorylation, and hypertrophic and proliferative responses in vascular smooth muscle cells. *Can. J. Physiol. Pharmacol.* **2009**, *87*, 1009–1018.
147. Chen, S.; Law, C.S.; Gardner, D.G. Vitamin D-dependent suppression of endothelin-induced vascular smooth muscle cell proliferation through inhibition of CDK2 activity. *J. Steroid Biochem. Mol. Biol.* **2010**, *118*, 135–141.
148. Alberts, G.F.; Peifley, K.A.; Johns, A.; Kleha, J.F.; Winkles, J.A. Constitutive endothelin-1 overexpression promotes smooth muscle cell proliferation via an external autocrine loop. *J. Biol. Chem.* **1994**, *269*, 10112–10118.
149. Kida, T.; Chuma, H.; Murata, T.; Yamawaki, H.; Matsumoto, S.; Hori, M.; Ozaki, H. Chronic treatment with PDGF-BB and endothelin-1 synergistically induces vascular hyperplasia and loss of contractility in organ-cultured rat tail artery. *Atherosclerosis* **2011**, *214*, 288–294.
150. Lu, J.; Wang, X.; Xie, X.; Han, D.; Li, S.; Li, M. [Calcineurin/NFAT signaling pathway mediates endothelin-1-induced pulmonary artery smooth muscle cell proliferation by regulating phosphodiesterase-5]. *Nan Fang Yi Ke Da Xue Xue Bao* **2013**, *33*, 26–29.
151. Tan, Z.; Yang, D.; Lu, W. [Effect of inhibition by 17beta-estradiol on endothelin-induced proliferation of vascular smooth muscle cells]. *Zhongguo Ying Yong Sheng Li Xue Za Zhi Zhongguo Yingyong Shenglixue Zazhi Chin. J. Appl. Physiol.* **2001**, *17*, 251–254.
152. Maruyama, H.; Dewachter, C.; Belhaj, A.; Rondelet, B.; Sakai, S.; Rimmelink, M.; Vachieri, J.-L.; Naeije, R.; Dewachter, L. Endothelin-Bone morphogenetic protein type 2 receptor interaction induces pulmonary artery smooth muscle cell hyperplasia in pulmonary arterial hypertension. *J. Heart Lung Transplant. Off. Publ. Int. Soc. Heart Transplant.* **2015**, *34*, 468–478.
153. Jiang, H.-N.; Zeng, B.; Chen, G.-L.; Lai, B.; Lu, S.-H.; Qu, J.-M. Lipopolysaccharide potentiates endothelin-1-induced proliferation of pulmonary arterial smooth muscle cells by upregulating TRPC channels. *Biomed. Pharmacother. Biomedecine Pharmacother.* **2016**, *82*, 20–27.
154. Jia, L.; Wang, R.; Tang, D.D. Abl regulates smooth muscle cell proliferation by modulating actin dynamics and ERK1/2 activation. *Am. J. Physiol. Cell Physiol.* **2012**, *302*, C1026–C1034.
155. Biasin, V.; Chwalek, K.; Wilhelm, J.; Best, J.; Marsh, L.M.; Ghanim, B.; Klepetko, W.; Fink, L.; Schermuly, R.T.; Weissmann, N.; et al. Endothelin-1 driven proliferation of pulmonary arterial smooth muscle cells is c-fos dependent. *Int. J. Biochem. Cell Biol.* **2014**, *54*, 137–148.
156. Rodríguez-Pascual, F.; Busnadiago, O.; Lagares, D.; Lamas, S. Role of endothelin in the cardiovascular system. *Pharmacol. Res.* **2011**, *63*, 463–472.

157. Hahn, A.W.; Regenass, S.; Resink, T.J.; Kern, F.; Bühler, F.R. Morphogenic effects of endothelin-1 on vascular smooth muscle cells. *J. Vasc. Res.* **1993**, *30*, 192–201.
158. Planas-Rigol, E.; Terrades-Garcia, N.; Corbera-Bellalta, M.; Lozano, E.; Alba, M.A.; Segarra, M.; Espígol-Frigolé, G.; Prieto-González, S.; Hernández-Rodríguez, J.; Preciado, S.; et al. Endothelin-1 promotes vascular smooth muscle cell migration across the artery wall: A mechanism contributing to vascular remodelling and intimal hyperplasia in giant-cell arteritis. *Ann. Rheum. Dis.* **2017**, *76*, 1624–1634.
159. Meoli, D.F.; White, R.J. Endothelin-1 induces pulmonary but not aortic smooth muscle cell migration by activating ERK1/2 MAP kinase. *Can. J. Physiol. Pharmacol.* **2010**, *88*, 830–839.
160. Kashima, Y.; Takahashi, M.; Shiba, Y.; Itano, N.; Izawa, A.; Koyama, J.; Nakayama, J.; Taniguchi, S.; Kimata, K.; Ikeda, U. Crucial role of hyaluronan in neointimal formation after vascular injury. *PLoS ONE* **2013**, *8*, e58760.
161. Vendrov, A.E.; Madamanchi, N.R.; Niu, X.-L.; Molnar, K.C.; Runge, M.; Szyndralewicz, C.; Page, P.; Runge, M.S. NADPH oxidases regulate CD44 and hyaluronic acid expression in thrombin-treated vascular smooth muscle cells and in atherosclerosis. *J. Biol. Chem.* **2010**, *285*, 26545–26557.
162. Fischer, J.W. Role of hyaluronan in atherosclerosis: Current knowledge and open questions. *Matrix Biol. J. Int. Soc. Matrix Biol.* **2019**, *78–79*, 324–336.
163. Wilkinson, T.S.; Bressler, S.L.; Evanko, S.P.; Braun, K.R.; Wight, T.N. Overexpression of hyaluronan synthases alters vascular smooth muscle cell phenotype and promotes monocyte adhesion. *J. Cell. Physiol.* **2006**, *206*, 378–385.
164. Grandoch, M.; Hoffmann, J.; Röck, K.; Wenzel, F.; Oberhuber, A.; Schelzig, H.; Fischer, J.W. Novel effects of adenosine receptors on pericellular hyaluronan matrix: Implications for human smooth muscle cell phenotype and interactions with monocytes during atherosclerosis. *Basic Res. Cardiol.* **2013**, *108*, 340.
165. Sadowitz, B.; Seymour, K.; Gahtan, V.; Maier, K.G. The role of hyaluronic acid in atherosclerosis and intimal hyperplasia. *J. Surg. Res.* **2012**, *173*, e63–e72.
166. Moretto, P.; Karousou, E.; Viola, M.; Caon, I.; D’Angelo, M.L.; De Luca, G.; Passi, A.; Vigetti, D. Regulation of hyaluronan synthesis in vascular diseases and diabetes. *J. Diabetes Res.* **2015**, *2015*, 167283.
167. Lorentzen, K.A.; Chai, S.; Chen, H.; Danielsen, C.C.; Simonsen, U.; Wogensen, L. Mechanisms involved in extracellular matrix remodeling and arterial stiffness induced by hyaluronan accumulation. *Atherosclerosis* **2016**, *244*, 195–203.
168. Evanko, S.P.; Angello, J.C.; Wight, T.N. Formation of hyaluronan- and versican-rich pericellular matrix is required for proliferation and migration of vascular smooth muscle cells. *Arterioscler. Thromb. Vasc. Biol.* **1999**, *19*, 1004–1013.
169. Svensson Holm, A.-C.B.; Bengtsson, T.; Grenegård, M.; Lindström, E.G. Hyaluronic acid influence on platelet-induced airway smooth muscle cell proliferation. *Exp. Cell Res.* **2012**, *318*, 632–640.
170. Stein, J.J.; Iwuchukwu, C.; Maier, K.G.; Gahtan, V. Thrombospondin-1-induced smooth muscle cell chemotaxis and proliferation are dependent on transforming growth factor- $\beta$ 2 and hyaluronic acid synthase. *Mol. Cell. Biochem.* **2013**, *384*, 181–186.
171. Papakonstantinou, E.; Karakiulakis, G.; Eickelberg, O.; Perruchoud, A.P.; Block, L.H.; Roth, M. A 340 kDa hyaluronic acid secreted by human vascular smooth muscle cells regulates their proliferation and migration. *Glycobiology* **1998**, *8*, 821–830.
172. Papakonstantinou, E.; Roth, M.; Block, L.H.; Mirtsou-Fidani, V.; Argiriadis, P.; Karakiulakis, G. The differential distribution of hyaluronic acid in the layers of human atheromatic aortas is associated with vascular smooth muscle cell proliferation and migration. *Atherosclerosis* **1998**, *138*, 79–89.
173. Kothapalli, D.; Flowers, J.; Xu, T.; Puré, E.; Assoian, R.K. Differential activation of ERK and Rac mediates the proliferative and anti-proliferative effects of hyaluronan and CD44. *J. Biol. Chem.* **2008**, *283*, 31823–31829.
174. Boudreau, N.; Turley, E.; Rabinovitch, M. Fibronectin, hyaluronan, and a hyaluronan binding protein contribute to increased ductus arteriosus smooth muscle cell migration. *Dev. Biol.* **1991**, *143*, 235–247.
175. Maier, K.G.; Sadowitz, B.; Cullen, S.; Han, X.; Gahtan, V. Thrombospondin-1-induced vascular smooth muscle cell migration is dependent on the hyaluronic acid receptor CD44. *Am. J. Surg.* **2009**, *198*, 664–669.
176. Gouëffic, Y.; Guilluy, C.; Guérin, P.; Patra, P.; Pacaud, P.; Loirand, G. Hyaluronan induces vascular smooth muscle cell migration through RHAMM-mediated PI3K-dependent Rac activation. *Cardiovasc. Res.* **2006**, *72*, 339–348.

177. Savani, R.C.; Wang, C.; Yang, B.; Zhang, S.; Kinsella, M.G.; Wight, T.N.; Stern, R.; Nance, D.M.; Turley, E.A. Migration of bovine aortic smooth muscle cells after wounding injury. The role of hyaluronan and RHAMM. *J. Clin. Invest.* **1995**, *95*, 1158–1168.
178. Bot, P.T.; Pasterkamp, G.; Goumans, M.-J.; Strijder, C.; Moll, F.L.; de Vries, J.-P.; Pals, S.T.; de Kleijn, D.P.; Piek, J.J.; Hoefer, I.E. Hyaluronic acid metabolism is increased in unstable plaques. *Eur. J. Clin. Invest.* **2010**, *40*, 818–827.
179. Chai, S.; Chai, Q.; Danielsen, C.C.; Hjorth, P.; Nyengaard, J.R.; Ledet, T.; Yamaguchi, Y.; Rasmussen, L.M.; Wogensen, L. Overexpression of hyaluronan in the tunica media promotes the development of atherosclerosis. *Circ. Res.* **2005**, *96*, 583–591.
180. Bouabdallah, J.; Zibara, K.; Issa, H.; Lenglet, G.; Kchour, G.; Caus, T.; Six, I.; Choukroun, G.; Kamel, S.; Bennis, Y. Endothelial cells exposed to phosphate and indoxyl sulphate promote vascular calcification through interleukin-8 secretion. *Nephrol. Dial. Transplant. Off. Publ. Eur. Dial. Transpl. Assoc.—Eur. Ren. Assoc.* **2019**, *34*, 1125–1134.
181. Raaz-Schrauder, D.; Klinghammer, L.; Baum, C.; Frank, T.; Lewczuk, P.; Achenbach, S.; Cicha, I.; Stumpf, C.; Wiltfang, J.; Kornhuber, J.; et al. Association of systemic inflammation markers with the presence and extent of coronary artery calcification. *Cytokine* **2012**, *57*, 251–257.
182. Gauss, S.; Klinghammer, L.; Steinhoff, A.; Raaz-Schrauder, D.; Marwan, M.; Achenbach, S.; Garlichs, C.D. Association of systemic inflammation with epicardial fat and coronary artery calcification. *Inflamm. Res. Off. J. Eur. Histamine Res. Soc. Al* **2015**, *64*, 313–319.
183. Hastings, N.E.; Feaver, R.E.; Lee, M.Y.; Wamhoff, B.R.; Blackman, B.R. Human IL-8 regulates smooth muscle cell VCAM-1 expression in response to endothelial cells exposed to atheroprone flow. *Arterioscler. Thromb. Vasc. Biol.* **2009**, *29*, 725–731.
184. Kim, J.H.; Kang, Y.J.; Kim, H.S. IL-8/CXCL8 Upregulates 12-Lipoxygenase Expression in Vascular Smooth Muscle Cells from Spontaneously Hypertensive Rats. *Immune Netw.* **2009**, *9*, 106–113.
185. Kuo, P.-L.; Hsu, Y.-L.; Huang, M.-S.; Chiang, S.-L.; Ko, Y.-C. Bronchial epithelium-derived IL-8 and RANTES increased bronchial smooth muscle cell migration and proliferation by Krüppel-like factor 5 in areca nut-mediated airway remodeling. *Toxicol. Sci. Off. J. Soc. Toxicol.* **2011**, *121*, 177–190.
186. Tang, H.; Sun, Y.; Shi, Z.; Huang, H.; Fang, Z.; Chen, J.; Xiu, Q.; Li, B. YKL-40 induces IL-8 expression from bronchial epithelium via MAPK (JNK and ERK) and NF- $\kappa$ B pathways, causing bronchial smooth muscle proliferation and migration. *J. Immunol. Baltim. Md 1950* **2013**, *190*, 438–446.
187. Meng, C.; Qi, X.; Li, Y.; Dang, Y.; Liu, H.; Wang, T.; Yuan, H.; Ni, Y.; Liu, G.; Wu, Z.; et al. [Interleukin-8 monoclonal antibody attenuates smooth muscle cell proliferation and balloon inflation-induced abdominal aorta stenosis in rabbits]. *Zhonghua Xin Xue Guan Bing Za Zhi* **2012**, *40*, 1056–1061.
188. Kuo, P.-L.; Hsu, Y.-L.; Tsai, M.-J.; Lien, C.-T.; Huang, M.-S.; Ko, Y.-C. Nonylphenol induces bronchial epithelial apoptosis via Fas-mediated pathway and stimulates bronchial epithelium to secrete IL-6 and IL-8, causing bronchial smooth muscle proliferation and migration. *Basic Clin. Pharmacol. Toxicol.* **2012**, *110*, 178–186.
189. Yue, T.L.; Wang, X.; Sung, C.P.; Olson, B.; McKenna, P.J.; Gu, J.L.; Feuerstein, G.Z. Interleukin-8. A mitogen and chemoattractant for vascular smooth muscle cells. *Circ. Res.* **1994**, *75*, 1–7.
190. Qin, Y.; Fan, F.; Zhao, Y.; Cui, Y.; Wei, X.; Kohama, K.; Gordon, J.R.; Li, F.; Gao, Y. Recombinant human CXCL8(3-72)K11R/G31P regulates smooth muscle cell proliferation and migration through blockage of interleukin-8 receptor. *IUBMB Life* **2013**, *65*, 67–75.
191. Lv, G.; Zhu, H.; Li, C.; Wang, J.; Zhao, D.; Li, S.; Ma, L.; Sun, G.; Li, F.; Zhao, Y.; et al. Inhibition of IL-8-mediated endothelial adhesion, VSMCs proliferation and migration by siRNA-TMEM98 suggests TMEM98's emerging role in atherosclerosis. *Oncotarget* **2017**, *8*, 88043–88058.
192. Govindaraju, V.; Michoud, M.-C.; Al-Chalabi, M.; Ferraro, P.; Powell, W.S.; Martin, J.G. Interleukin-8: Novel roles in human airway smooth muscle cell contraction and migration. *Am. J. Physiol. Cell Physiol.* **2006**, *291*, C957–C965.
193. Yue, T.L.; McKenna, P.J.; Gu, J.L.; Feuerstein, G.Z. Interleukin-8 is chemotactic for vascular smooth muscle cells. *Eur. J. Pharmacol.* **1993**, *240*, 81–84.
194. Lim, H.K.; Ryoo, S. Native low-density lipoprotein-dependent interleukin-8 production through pertussis toxin-sensitive G-protein coupled receptors and hydrogen peroxide generation contributes to migration of human aortic smooth muscle cells. *Yonsei Med. J.* **2011**, *52*, 413–419.
195. Meng, D.; Lv, D.-D.; Fang, J. Insulin-like growth factor-I induces reactive oxygen species production and cell migration through Nox4 and Rac1 in vascular smooth muscle cells. *Cardiovasc. Res.* **2008**, *80*, 299–308.

196. Meng, D.; Shi, X.; Jiang, B.-H.; Fang, J. Insulin-like growth factor-I (IGF-I) induces epidermal growth factor receptor transactivation and cell proliferation through reactive oxygen species. *Free Radic. Biol. Med.* **2007**, *42*, 1651–1660.
197. Sukhanov, S.; Higashi, Y.; Shai, S.-Y.; Vaughn, C.; Mohler, J.; Li, Y.; Song, Y.-H.; Titterington, J.; Delafontaine, P. IGF-1 reduces inflammatory responses, suppresses oxidative stress, and decreases atherosclerosis progression in ApoE-deficient mice. *Arterioscler. Thromb. Vasc. Biol.* **2007**, *27*, 2684–2690.
198. Sukhanov, S.; Higashi, Y.; Shai, S.-Y.; Blackstock, C.; Galvez, S.; Vaughn, C.; Titterington, J.; Delafontaine, P. Differential requirement for nitric oxide in IGF-1-induced anti-apoptotic, anti-oxidant and anti-atherosclerotic effects. *FEBS Lett.* **2011**, *585*, 3065–3072.
199. Stratton, M.S.; Yang, X.; Sreejayan, N.; Ren, J. Impact of insulin-like growth factor-I on migration, proliferation and Akt-ERK signaling in early and late-passages of vascular smooth muscle cells. *Cardiovasc. Toxicol.* **2007**, *7*, 273–281.
200. Allen, T.R.; Krueger, K.D.; Hunter, W.J.; Agrawal, D.K. Evidence that insulin-like growth factor-1 requires protein kinase C-epsilon, PI3-kinase and mitogen-activated protein kinase pathways to protect human vascular smooth muscle cells from apoptosis. *Immunol. Cell Biol.* **2005**, *83*, 651–667.
201. Bai, H. z.; Pollman, M.J.; Inishi, Y.; Gibbons, G.H. Regulation of vascular smooth muscle cell apoptosis. Modulation of bad by a phosphatidylinositol 3-kinase-dependent pathway. *Circ. Res.* **1999**, *85*, 229–237.
202. Sun, M.; Wang, F.; Feng, P. Insulin-like growth factor-1 inhibits colonic smooth muscle cell apoptosis in diabetic rats with colonic dysmotility. *Regul. Pept.* **2014**, *194–195*, 41–48.
203. Zwaka, T.P.; Torzewski, J.; Hoeflich, A.; Déjosez, M.; Kaiser, S.; Hombach, V.; Jehle, P.M. The terminal complement complex inhibits apoptosis in vascular smooth muscle cells by activating an autocrine IGF-1 loop. *FASEB J. Off. Publ. Fed. Am. Soc. Exp. Biol.* **2003**, *17*, 1346–1348.
204. González-Timón, B.; González-Muñoz, M.; Zaragoza, C.; Lamas, S.; Melián, E.M. Native and oxidized low density lipoproteins oppositely modulate the effects of insulin-like growth factor I on VSMC. *Cardiovasc. Res.* **2004**, *61*, 247–255.
205. Jin, C.; Guo, J.; Qiu, X.; Ma, K.; Xiang, M.; Zhu, X.; Guo, J. IGF-1 induces iNOS expression via the p38 MAPK signal pathway in the anti-apoptotic process in pulmonary artery smooth muscle cells during PAH. *J. Recept. Signal Transduct. Res.* **2014**, *34*, 325–331.
206. Kuemmerle, J.F.; Zhou, H.; Bowers, J.G. IGF-I stimulates human intestinal smooth muscle cell growth by regulation of G1 phase cell cycle proteins. *Am. J. Physiol. Gastrointest. Liver Physiol.* **2004**, *286*, G412–G419.
207. Myit, S.; Delafontaine, P.; Bochaton-Piallat, M.-L.; Giraud, S.; Gabbiani, G.; Brink, M. Different growth properties of neointimal and medial smooth muscle cells in response to growth factors. *J. Vasc. Res.* **2003**, *40*, 97–104.
208. Chen, Y.; Capron, L.; Magnusson, J.O.; Wallby, L.A.; Arnqvist, H.J. Insulin-like growth factor-1 stimulates vascular smooth muscle cell proliferation in rat aorta in vivo. *Growth Horm. IGF Res. Off. J. Growth Horm. Res. Soc. Int. IGF Res. Soc.* **1998**, *8*, 299–303.
209. Yano, K.; Bauchat, J.R.; Liimatta, M.B.; Clemmons, D.R.; Duan, C. Down-regulation of protein kinase C inhibits insulin-like growth factor I-induced vascular smooth muscle cell proliferation, migration, and gene expression. *Endocrinology* **1999**, *140*, 4622–4632.
210. Cheng, G.; Kim, M.-J.; Jia, G.; Agrawal, D.K. Involvement of chloride channels in IGF-I-induced proliferation of porcine arterial smooth muscle cells. *Cardiovasc. Res.* **2007**, *73*, 198–207.
211. Imai, Y.; Clemmons, D.R. Roles of phosphatidylinositol 3-kinase and mitogen-activated protein kinase pathways in stimulation of vascular smooth muscle cell migration and deoxyribonucleic acid synthesis by insulin-like growth factor-I. *Endocrinology* **1999**, *140*, 4228–4235.
212. Allen, L.B.; Capps, B.E.; Miller, E.C.; Clemmons, D.R.; Maile, L.A. Glucose-oxidized low-density lipoproteins enhance insulin-like growth factor I-stimulated smooth muscle cell proliferation by inhibiting integrin-associated protein cleavage. *Endocrinology* **2009**, *150*, 1321–1329.
213. Duan, C.; Bauchat, J.R.; Hsieh, T. Phosphatidylinositol 3-kinase is required for insulin-like growth factor-I-induced vascular smooth muscle cell proliferation and migration. *Circ. Res.* **2000**, *86*, 15–23.
214. González, B.; Lamas, S.; Melián, E.M. Cooperation between low density lipoproteins and IGF-I in the promotion of mitogenesis in vascular smooth muscle cells. *Endocrinology* **2001**, *142*, 4852–4860.
215. Bayes-Genis, A.; Schwartz, R.S.; Bale, L.K.; Conover, C.A. Effects of insulin-like growth factor-I on cultured human coronary artery smooth muscle cells. *Growth Horm. IGF Res. Off. J. Growth Horm. Res. Soc. Int. IGF Res. Soc.* **2003**, *13*, 246–253.

216. Wang, L.; Han, Y.; Shen, Y.; Yan, Z.-Q.; Zhang, P.; Yao, Q.-P.; Shen, B.-R.; Gao, L.-Z.; Qi, Y.-X.; Jiang, Z.-L. Endothelial insulin-like growth factor-1 modulates proliferation and phenotype of smooth muscle cells induced by low shear stress. *Ann. Biomed. Eng.* **2014**, *42*, 776–786.
217. Li, K.; Wang, Y.; Zhang, A.; Liu, B.; Jia, L. miR-379 Inhibits Cell Proliferation, Invasion, and Migration of Vascular Smooth Muscle Cells by Targeting Insulin-Like Factor-1. *Yonsei Med. J.* **2017**, *58*, 234–240.
218. Kou, X.; Han, Y.; Yang, D.; Liu, Y.; Fu, J.; Zheng, S.; He, D.; Zhou, L.; Zeng, C. Dopamine d(1)-like receptors suppress proliferation of vascular smooth muscle cell induced by insulin-like growth factor-1. *Clin. Exp. Hypertens. N. Y. N 1993* **2014**, *36*, 140–147.
219. Shuang, T.; Fu, M.; Yang, G.; Wu, L.; Wang, R. The interaction of IGF-1/IGF-1R and hydrogen sulfide on the proliferation of mouse primary vascular smooth muscle cells. *Biochem. Pharmacol.* **2018**, *149*, 143–152.
220. Pukac, L.; Huangpu, J.; Karnovsky, M.J. Platelet-derived growth factor-BB, insulin-like growth factor-I, and phorbol ester activate different signaling pathways for stimulation of vascular smooth muscle cell migration. *Exp. Cell Res.* **1998**, *242*, 548–560.
221. Bornfeldt, K.E.; Raines, E.W.; Nakano, T.; Graves, L.M.; Krebs, E.G.; Ross, R. Insulin-like growth factor-I and platelet-derived growth factor-BB induce directed migration of human arterial smooth muscle cells via signaling pathways that are distinct from those of proliferation. *J. Clin. Invest.* **1994**, *93*, 1266–1274.
222. Ruiz-Torres, A.; Lozano, R.; Melón, J.; Carraro, R. Age-dependent decline of in vitro migration (basal and stimulated by IGF-1 or insulin) of human vascular smooth muscle cells. *J. Gerontol. A. Biol. Sci. Med. Sci.* **2003**, *58*, B1074–B1077.
223. Beneit, N.; Fernández-García, C.E.; Martín-Ventura, J.L.; Perdomo, L.; Escribano, Ó.; Michel, J.B.; García-Gómez, G.; Fernández, S.; Díaz-Castroverde, S.; Egido, J.; et al. Expression of insulin receptor (IR) A and B isoforms, IGF-IR, and IR/IGF-IR hybrid receptors in vascular smooth muscle cells and their role in cell migration in atherosclerosis. *Cardiovasc. Diabetol.* **2016**, *15*, 161.
224. Jia, G.; Cheng, G.; Gangahar, D.M.; Agrawal, D.K. Insulin-like growth factor-1 and TNF-alpha regulate autophagy through c-jun N-terminal kinase and Akt pathways in human atherosclerotic vascular smooth cells. *Immunol. Cell Biol.* **2006**, *84*, 448–454.
225. Okura, Y.; Brink, M.; Zahid, A.A.; Anwar, A.; Delafontaine, P. Decreased expression of insulin-like growth factor-1 and apoptosis of vascular smooth muscle cells in human atherosclerotic plaque. *J. Mol. Cell. Cardiol.* **2001**, *33*, 1777–1789.
226. von der Thüsen, J.H.; Borensztajn, K.S.; Moimas, S.; van Heiningen, S.; Teeling, P.; van Berkel, T.J.C.; Biessen, E.A.L. IGF-1 has plaque-stabilizing effects in atherosclerosis by altering vascular smooth muscle cell phenotype. *Am. J. Pathol.* **2011**, *178*, 924–934.
227. Shai, S.-Y.; Sukhanov, S.; Higashi, Y.; Vaughn, C.; Kelly, J.; Delafontaine, P. Smooth muscle cell-specific insulin-like growth factor-1 overexpression in Apoe<sup>-/-</sup> mice does not alter atherosclerotic plaque burden but increases features of plaque stability. *Arterioscler. Thromb. Vasc. Biol.* **2010**, *30*, 1916–1924.
228. Mallat, Z.; Heymes, C.; Ohan, J.; Faggin, E.; Lesèche, G.; Tedgui, A. Expression of interleukin-10 in advanced human atherosclerotic plaques: Relation to inducible nitric oxide synthase expression and cell death. *Arterioscler. Thromb. Vasc. Biol.* **1999**, *19*, 611–616.
229. Potteaux, S.; Esposito, B.; van Oostrom, O.; Brun, V.; Ardouin, P.; Groux, H.; Tedgui, A.; Mallat, Z. Leukocyte-derived interleukin 10 is required for protection against atherosclerosis in low-density lipoprotein receptor knockout mice. *Arterioscler. Thromb. Vasc. Biol.* **2004**, *24*, 1474–1478.
230. Rajagopal, S.P.; Hutchinson, J.L.; Dorward, D.A.; Rossi, A.G.; Norman, J.E. Crosstalk between monocytes and myometrial smooth muscle in culture generates synergistic pro-inflammatory cytokine production and enhances myocyte contraction, with effects opposed by progesterone. *Mol. Hum. Reprod.* **2015**, *21*, 672–686.
231. Mazighi, M.; Pellé, A.; Gonzalez, W.; Mtairag, E.M.; Philippe, M.; Hénin, D.; Michel, J.-B.; Feldman, L.J. IL-10 inhibits vascular smooth muscle cell activation in vitro and in vivo. *Am. J. Physiol. Heart Circ. Physiol.* **2004**, *287*, H866–H871.
232. Liu, H.; Yang, S.; Sun, X.; Chen, T. Human interleukin-10 gene inhibits acute rejection by triggering apoptosis in allograft vascular transplantation. *Int. J. Clin. Exp. Pathol.* **2014**, *7*, 5864–5871.

233. Ito, T.; Okada, T.; Miyashita, H.; Nomoto, T.; Nonaka-Sarukawa, M.; Uchibori, R.; Maeda, Y.; Urabe, M.; Mizukami, H.; Kume, A.; et al. Interleukin-10 expression mediated by an adeno-associated virus vector prevents monocrotaline-induced pulmonary arterial hypertension in rats. *Circ. Res.* **2007**, *101*, 734–741.
234. Selzman, C.H.; Shames, B.D.; Whitehill, T.A.; Harken, A.H.; McIntyre, R.C. Class II cytokine receptor ligands inhibit human vascular smooth muscle proliferation. *Surgery* **1998**, *124*, 318–326; discussion 326–327.
235. Xia, C.; Huo, Y.; Yin, H.; Zhu, G.; Tang, C. Interleukin 10 inhibits the rat VSMC proliferation and collagen secretion stimulated by angiotensin II. *Chin. Med. Sci. J. Chung-Kuo Hsueh Ko Hsueh Tsa Chih* **2001**, *16*, 125–128.
236. Ouyang, P.; Peng, L.-S.; Yang, H.; Peng, W.-L.; Wu, W.-Y.; Xu, A.-L. Recombinant human interleukin-10 inhibits proliferation of vascular smooth muscle cells stimulated by advanced glycation end products and neointima hyperplasia after carotid injury in the rat. *Sheng Li Xue Bao* **2003**, *55*, 128–134.
237. Selzman, C.H.; Meldrum, D.R.; Cain, B.S.; Meng, X.; Shames, B.D.; Ao, L.; Harken, A.H. Interleukin-10 inhibits postinjury tumor necrosis factor-mediated human vascular smooth muscle proliferation. *J. Surg. Res.* **1998**, *80*, 352–356.
238. Selzman, C.H.; McIntyre, R.C.; Shames, B.D.; Whitehill, T.A.; Banerjee, A.; Harken, A.H. Interleukin-10 inhibits human vascular smooth muscle proliferation. *J. Mol. Cell. Cardiol.* **1998**, *30*, 889–896.
239. Kim, H.Y.; Kim, H.S. Dimethylarginine dimethylaminohydrolase-1 mediates inhibitory effect of interleukin-10 on angiotensin II-induced hypertensive effects in vascular smooth muscle cells of spontaneously hypertensive rats. *Cytokine* **2016**, *77*, 203–210.
240. Zerneck, A.; Liehn, E.A.; Gao, J.-L.; Kuziel, W.A.; Murphy, P.M.; Weber, C. Deficiency in CCR5 but not CCR1 protects against neointima formation in atherosclerosis-prone mice: Involvement of IL-10. *Blood* **2006**, *107*, 4240–4243.
241. Rectenwald, J.E.; Minter, R.M.; Moldawer, L.L.; Abouhamze, Z.; La Face, D.; Hutchins, E.; Huber, T.S.; Seeger, J.M.; Ozaki, C.K. Interleukin-10 fails to modulate low shear stress-induced neointimal hyperplasia. *J. Surg. Res.* **2002**, *102*, 110–118.
242. Sage, A.P.; Nus, M.; Baker, L.L.; Finigan, A.J.; Masters, L.M.; Mallat, Z. Regulatory B cell-specific interleukin-10 is dispensable for atherosclerosis development in mice. *Arterioscler. Thromb. Vasc. Biol.* **2015**, *35*, 1770–1773.
243. Schelski, N.; Luong, T.T.D.; Lang, F.; Pieske, B.; Voelkl, J.; Alesutan, I., SGK1-dependent Stimulation of Vascular Smooth Muscle Cell Osteo-/Chondrogenic Transdifferentiation by interleukin-18 Available online: [https://pubmed.ncbi.nlm.nih.gov/30706178/?from\\_term=il-18+AND+calcification&from\\_size=50&from\\_pos=7](https://pubmed.ncbi.nlm.nih.gov/30706178/?from_term=il-18+AND+calcification&from_size=50&from_pos=7) (accessed on Mar 19, 2020).
244. Zhang, K.; Zhang, Y.; Feng, W.; Chen, R.; Chen, J.; Touyz, R.M.; Wang, J.; Huang, H. Interleukin-18 Enhances Vascular Calcification and Osteogenic Differentiation of Vascular Smooth Muscle Cells Through TRPM7 Activation. *Arterioscler. Thromb. Vasc. Biol.* **2017**, *37*, 1933–1943.
245. Wang, B.; Wei, G.; Liu, B.; Zhou, X.; Xiao, H.; Dong, N.; Li, F. The Role of High Mobility Group Box 1 Protein in Interleukin-18-Induced Myofibroblastic Transition of Valvular Interstitial Cells. *Cardiology* **2016**, *135*, 168–178.
246. Porązko, T.; Kuźniar, J.; Kuształ, M.; Kuźniar, T. J.; Weyde, W.; Kuriata-Kordek, M.; Klinger, M, IL-18 Is Involved in Vascular Injury in End-Stage Renal Disease Patients Available online: [https://pubmed.ncbi.nlm.nih.gov/18775894/?from\\_term=il-18+AND+calcification&from\\_size=50&from\\_pos=9](https://pubmed.ncbi.nlm.nih.gov/18775894/?from_term=il-18+AND+calcification&from_size=50&from_pos=9) (accessed on Mar 19, 2020).
247. Kiu Weber, C. I., Duchateau-Nguyen, G., Solier, C., Schell-Steven, A., Hermosilla, R., Nogoceke, E., Block, G, Cardiovascular Risk Markers Associated With Arterial Calcification in Patients With Chronic Kidney Disease Stages 3 and 4 Available online: [https://pubmed.ncbi.nlm.nih.gov/24683472/?from\\_term=il-18+AND+calcification&from\\_size=50&from\\_pos=17](https://pubmed.ncbi.nlm.nih.gov/24683472/?from_term=il-18+AND+calcification&from_size=50&from_pos=17) (accessed on Mar 19, 2020).
248. Venkatesan, B.; Valente, A.J.; Reddy, V.S.; Siwik, D.A.; Chandrasekar, B. Resveratrol blocks interleukin-18-EMMPRIN cross-regulation and smooth muscle cell migration. *Am. J. Physiol. Heart Circ. Physiol.* **2009**, *297*, H874–H886.
249. Rodriguez-Menocal, L.; Faridi, M.H.; Martinez, L.; Shehadeh, L.A.; Duque, J.C.; Wei, Y.; Mesa, A.; Pena, A.; Gupta, V.; Pham, S.M.; et al. Macrophage-derived IL-18 and increased fibrinogen deposition are age-related inflammatory signatures of vascular remodeling. *Am. J. Physiol. Heart Circ. Physiol.* **2014**, *306*, H641–H653.

250. Valente, A.J.; Yoshida, T.; Murthy, S.N.; Sakamuri, S.S.V.P.; Katsuyama, M.; Clark, R.A.; Delafontaine, P.; Chandrasekar, B. Angiotensin II enhances AT1-Nox1 binding and stimulates arterial smooth muscle cell migration and proliferation through AT1, Nox1, and interleukin-18. *Am. J. Physiol. Heart Circ. Physiol.* **2012**, *303*, H282–H296.
251. Zhang, S.; Luo, X.; Huang, H.; Chai, Y.; Hu, D.; Tao, Q. [N-acetylcysteine antagonizes the Interleukin-18-induced expression of TNF-alpha and IL-6 in mouse vascular smooth muscle cells]. *Xi Bao Yu Fen Zi Mian Yi Xue Za Zhi Chin. J. Cell. Mol. Immunol.* **2010**, *26*, 35–37.
252. Sahar, S.; Dwarakanath, R.S.; Reddy, M.A.; Lanting, L.; Todorov, I.; Natarajan, R. Angiotensin II enhances interleukin-18 mediated inflammatory gene expression in vascular smooth muscle cells: A novel cross-talk in the pathogenesis of atherosclerosis. *Circ. Res.* **2005**, *96*, 1064–1071.
253. Gerdes, N.; Sukhova, G.K.; Libby, P.; Reynolds, R.S.; Young, J.L.; Schönbeck, U. Expression of interleukin (IL)-18 and functional IL-18 receptor on human vascular endothelial cells, smooth muscle cells, and macrophages: Implications for atherogenesis. *J. Exp. Med.* **2002**, *195*, 245–257.
254. Chandrasekar, B.; Mummidi, S.; Valente, A.J.; Patel, D.N.; Bailey, S.R.; Freeman, G.L.; Hatano, M.; Tokuhisa, T.; Jensen, L.E. The pro-atherogenic cytokine interleukin-18 induces CXCL16 expression in rat aortic smooth muscle cells via MyD88, interleukin-1 receptor-associated kinase, tumor necrosis factor receptor-associated factor 6, c-Src, phosphatidylinositol 3-kinase, Akt, c-Jun N-terminal kinase, and activator protein-1 signaling. *J. Biol. Chem.* **2005**, *280*, 26263–26277.
255. Maffia, P.; Grassia, G.; Di Meglio, P.; Carnuccio, R.; Berrino, L.; Garside, P.; Ianaro, A.; Ialenti, A. Neutralization of interleukin-18 inhibits neointimal formation in a rat model of vascular injury. *Circulation* **2006**, *114*, 430–437.
256. Lin, Y.-C.; Chiang, C.-H.; Chang, L.-T.; Sun, C.-K.; Leu, S.; Shao, P.-L.; Hsieh, M.-C.; Tsai, T.-H.; Chua, S.; Chung, S.-Y.; et al. Simvastatin attenuates the additive effects of TNF- $\alpha$  and IL-18 on the connexin 43 up-regulation and over-proliferation of cultured aortic smooth muscle cells. *Cytokine* **2013**, *62*, 341–351.
257. Hamakawa, T.; Sasaki, S.; Shibata, Y.; Imura, M.; Kubota, Y.; Kojima, Y.; Kohri, K. Interleukin-18 may lead to benign prostatic hyperplasia via thrombospondin-1 production in prostatic smooth muscle cells. *The Prostate* **2014**, *74*, 590–601.
258. Chandrasekar, B.; Mummidi, S.; Mahimainathan, L.; Patel, D.N.; Bailey, S.R.; Imam, S.Z.; Greene, W.C.; Valente, A.J. Interleukin-18-induced human coronary artery smooth muscle cell migration is dependent on NF-kappaB- and AP-1-mediated matrix metalloproteinase-9 expression and is inhibited by atorvastatin. *J. Biol. Chem.* **2006**, *281*, 15099–15109.
259. Valente, A.J.; Yoshida, T.; Izadpanah, R.; Delafontaine, P.; Siebenlist, U.; Chandrasekar, B. Interleukin-18 enhances IL-18R/Nox1 binding, and mediates TRAF3IP2-dependent smooth muscle cell migration. Inhibition by simvastatin. *Cell. Signal.* **2013**, *25*, 1447–1456.
260. Elhage, R.; Jawien, J.; Rudling, M.; Ljunggren, H.-G.; Takeda, K.; Akira, S.; Bayard, F.; Hansson, G.K. Reduced atherosclerosis in interleukin-18 deficient apolipoprotein E-knockout mice. *Cardiovasc. Res.* **2003**, *59*, 234–240.
261. Tenger, C.; Sundborger, A.; Jawien, J.; Zhou, X. IL-18 accelerates atherosclerosis accompanied by elevation of IFN-gamma and CXCL16 expression independently of T cells. *Arterioscler. Thromb. Vasc. Biol.* **2005**, *25*, 791–796.
262. Pejnovic, N.; Vratimos, A.; Lee, S.H.; Popadic, D.; Takeda, K.; Akira, S.; Chan, W.L. Increased atherosclerotic lesions and Th17 in interleukin-18 deficient apolipoprotein E-knockout mice fed high-fat diet. *Mol. Immunol.* **2009**, *47*, 37–45.
263. Mallat, Z.; Corbaz, A.; Scoazec, A.; Graber, P.; Alouani, S.; Esposito, B.; Humbert, Y.; Chvatchko, Y.; Tedgui, A. Interleukin-18/interleukin-18 binding protein signaling modulates atherosclerotic lesion development and stability. *Circ. Res.* **2001**, *89*, E41–E45.
264. Pigarevskii, P.V.; Maltseva, S.V.; Snegova, V.A.; Davydova, N.G. Role of interleukin-18 in destabilization of the atherosclerotic plaque in humans. *Bull. Exp. Biol. Med.* **2014**, *157*, 821–824.
265. de Nooijer, R.; von der Thüsen, J.H.; Verkleij, C.J.N.; Kuiper, J.; Jukema, J.W.; van der Wall, E.E.; van Berkel, J.C.; Biessen, E. a. L. Overexpression of IL-18 decreases intimal collagen content and promotes a vulnerable plaque phenotype in apolipoprotein-E-deficient mice. *Arterioscler. Thromb. Vasc. Biol.* **2004**, *24*, 2313–2319.
266. Bessueille, L.; Fakhry, M.; Hamade, E.; Badran, B.; Magne, D. Glucose stimulates chondrocyte differentiation of vascular smooth muscle cells and calcification: A possible role for IL-1 $\beta$ . *FEBS Lett.* **2015**, *589*, 2797–2804.

267. Ceneri, N.; Zhao, L.; Young, B.D.; Healy, A.; Coskun, S.; Vasavada, H.; Yarovinsky, T.O.; Ike, K.; Pardi, R.; Qin, L.; et al. Rac2 Modulates Atherosclerotic Calcification by Regulating Macrophage IL-1 $\beta$  Production. *Arterioscler. Thromb. Vasc. Biol.* **2017**, *37*, 328–340.
268. Han, L.; Zhang, Y.; Zhang, M.; Guo, L.; Wang, J.; Zeng, F.; Xu, D.; Yin, Z.; Xu, Y.; Wang, D.; et al. Interleukin-1 $\beta$ -Induced Senescence Promotes Osteoblastic Transition of Vascular Smooth Muscle Cells. *Kidney Blood Press. Res.* **2020**, *45*, 314–330.
269. Dautova, Y.; Kapustin, A.N.; Pappert, K.; Epple, M.; Okkenhaug, H.; Cook, S.J.; Shanahan, C.M.; Bootman, M.D.; Proudfoot, D. Calcium phosphate particles stimulate interleukin-1 $\beta$  release from human vascular smooth muscle cells: A role for spleen tyrosine kinase and exosome release. *J. Mol. Cell. Cardiol.* **2018**, *115*, 82–93.
270. Agharazii, M.; St-Louis, R.; Gautier-Bastien, A.; Ung, R.-V.; Mokas, S.; Larivière, R.; Richard, D.E. Inflammatory cytokines and reactive oxygen species as mediators of chronic kidney disease-related vascular calcification. *Am. J. Hypertens.* **2015**, *28*, 746–755.
271. Awan, Z.; Denis, M.; Roubtsova, A.; Essalmani, R.; Marcinkiewicz, J.; Awan, A.; Gram, H.; Seidah, N.G.; Genest, J. Reducing Vascular Calcification by Anti-IL-1 $\beta$  Monoclonal Antibody in a Mouse Model of Familial Hypercholesterolemia. *Angiology* **2016**, *67*, 157–167.
272. Kraśniak, A.; Drozd, M.; Pasowicz, M.; Chmiel, G.; Michałek, M.; Szumilak, D.; Podolec, P.; Klimeczek, P.; Koniecznyńska, M.; Wicher-Muniak, E.; et al. Factors involved in vascular calcification and atherosclerosis in maintenance haemodialysis patients. *Nephrol. Dial. Transplant. Off. Publ. Eur. Dial. Transpl. Assoc. — Eur. Ren. Assoc.* **2007**, *22*, 515–521.
273. Ikeda, K.; Souma, Y.; Akakabe, Y.; Kitamura, Y.; Matsuo, K.; Shimoda, Y.; Ueyama, T.; Matoba, S.; Yamada, H.; Okigaki, M.; et al. Macrophages play a unique role in the plaque calcification by enhancing the osteogenic signals exerted by vascular smooth muscle cells. *Biochem. Biophys. Res. Commun.* **2012**, *425*, 39–44.
274. Hoare, G.S.; Marczin, N.; Chester, A.H.; Yacoub, M.H. Role of oxidant stress in cytokine-induced activation of NF- $\kappa$ B in human aortic smooth muscle cells. *Am. J. Physiol.* **1999**, *277*, H1975–H1984.
275. Alexander, M.R.; Murgai, M.; Moehle, C.W.; Owens, G.K. Interleukin-1 $\beta$  modulates smooth muscle cell phenotype to a distinct inflammatory state relative to PDGF-DD via NF- $\kappa$ B-dependent mechanisms. *Physiol. Genomics* **2012**, *44*, 417–429.
276. Lim, J.H.; Um, H.J.; Park, J.-W.; Lee, I.-K.; Kwon, T.K. Interleukin-1 $\beta$  promotes the expression of monocyte chemoattractant protein-1 in human aorta smooth muscle cells via multiple signaling pathways. *Exp. Mol. Med.* **2009**, *41*, 757–764.
277. Braun, M.; Pietsch, P.; Zepp, A.; Schrör, K.; Baumann, G.; Felix, S.B. Regulation of tumor necrosis factor alpha- and interleukin-1 $\beta$ -induced induced adhesion molecule expression in human vascular smooth muscle cells by cAMP. *Arterioscler. Thromb. Vasc. Biol.* **1997**, *17*, 2568–2575.
278. Wang, X.; Feuerstein, G.Z.; Gu, J.L.; Lysko, P.G.; Yue, T.L. Interleukin-1 $\beta$  induces expression of adhesion molecules in human vascular smooth muscle cells and enhances adhesion of leukocytes to smooth muscle cells. *Atherosclerosis* **1995**, *115*, 89–98.
279. Wang, X.; Feuerstein, G.Z.; Clark, R.K.; Yue, T.L. Enhanced leucocyte adhesion to interleukin-1 $\beta$  stimulated vascular smooth muscle cells is mainly through intercellular adhesion molecule-1. *Cardiovasc. Res.* **1994**, *28*, 1808–1814.
280. Vromman, A.; Trabelsi, N.; Rouxel, C.; Béréziat, G.; Limon, I.; Blaise, R.  $\beta$ -Amyloid context intensifies vascular smooth muscle cells induced inflammatory response and de-differentiation. *Aging Cell* **2013**, *12*, 358–369.
281. Clément, N.; Gueguen, M.; Glorian, M.; Blaise, R.; Andréani, M.; Brou, C.; Bausero, P.; Limon, I. Notch3 and IL-1 $\beta$  exert opposing effects on a vascular smooth muscle cell inflammatory pathway in which NF- $\kappa$ B drives crosstalk. *J. Cell Sci.* **2007**, *120*, 3352–3361.
282. Clarke, M.C.H.; Talib, S.; Figg, N.L.; Bennett, M.R. Vascular smooth muscle cell apoptosis induces interleukin-1 $\beta$ -directed inflammation: Effects of hyperlipidemia-mediated inhibition of phagocytosis. *Circ. Res.* **2010**, *106*, 363–372.
283. Geng, Y.J.; Henderson, L.E.; Levesque, E.B.; Muszynski, M.; Libby, P. Fas is expressed in human atherosclerotic intima and promotes apoptosis of cytokine-primed human vascular smooth muscle cells. *Arterioscler. Thromb. Vasc. Biol.* **1997**, *17*, 2200–2208.



284. Geng, Y.J.; Wu, Q.; Muszynski, M.; Hansson, G.K.; Libby, P. Apoptosis of vascular smooth muscle cells induced by in vitro stimulation with interferon-gamma, tumor necrosis factor-alpha, and interleukin-1 beta. *Arterioscler. Thromb. Vasc. Biol.* **1996**, *16*, 19–27.
285. Bourcier, T.; Dockter, M.; Hassid, A. Synergistic interaction of interleukin-1 beta and growth factors in primary cultures of rat aortic smooth muscle cells. *J. Cell. Physiol.* **1995**, *164*, 644–657.
286. Forsyth, E.A.; Aly, H.M.; Neville, R.F.; Sidawy, A.N. Proliferation and extracellular matrix production by human infragenicular smooth muscle cells in response to interleukin-1 beta. *J. Vasc. Surg.* **1997**, *26*, 1002–1007; discussion 1007–1008.
287. Barillari, G.; Albonici, L.; Incerpi, S.; Bogetto, L.; Pistritto, G.; Volpi, A.; Ensoli, B.; Manzari, V. Inflammatory cytokines stimulate vascular smooth muscle cells locomotion and growth by enhancing alpha5beta1 integrin expression and function. *Atherosclerosis* **2001**, *154*, 377–385.
288. Sharma, H.S.; Alagappan, V.K.T.; Willems-Widyastuti, A.; Mooi, W.J.; de Boer, W.I. Nitric oxide donors augment interleukin-1 $\beta$ -induced vascular endothelial growth factor in airway smooth muscle cells. *Cell Biochem. Biophys.* **2013**, *67*, 247–254.
289. Wang, X.; Chen, L.; Liu, J.; Yan, T.; Wu, G.; Xia, Y.; Zong, G.; Li, F. In vivo treatment of rat arterial adventitia with interleukin-1 $\beta$  induces intimal proliferation via the JAK2/STAT3 signaling pathway. *Mol. Med. Rep.* **2016**, *13*, 3451–3458.
290. Wang, J.; Razuvaev, A.; Folkersen, L.; Hedin, E.; Roy, J.; Brismar, K.; Hedin, U. The expression of IGFs and IGF binding proteins in human carotid atherosclerosis, and the possible role of IGF binding protein-1 in the regulation of smooth muscle cell proliferation. *Atherosclerosis* **2012**, *220*, 102–109.
291. Choi, H.C.; Kim, H.S.; Lee, K.Y.; Chang, K.C.; Kang, Y.J. NS-398, a selective COX-2 inhibitor, inhibits proliferation of IL-1beta-stimulated vascular smooth muscle cells by induction of HO-1. *Biochem. Biophys. Res. Commun.* **2008**, *376*, 753–757.
292. Kim, H.J.; Kim, M.Y.; Hwang, J.S.; Kim, H.J.; Lee, J.H.; Chang, K.C.; Kim, J.-H.; Han, C.W.; Kim, J.-H.; Seo, H.G. PPARdelta inhibits IL-1beta-stimulated proliferation and migration of vascular smooth muscle cells via up-regulation of IL-1Ra. *Cell. Mol. Life Sci. CMLS* **2010**, *67*, 2119–2130.
293. Li, P.; Li, Y.; Li, Z.; Wu, Y.; Zhang, C.; A., X.; Wang, C.; Shi, H.; Hui, M.; Xie, B.; et al. Cross talk between vascular smooth muscle cells and monocytes through interleukin-1 $\beta$ /interleukin-18 signaling promotes vein graft thickening. *Arterioscler. Thromb. Vasc. Biol.* **2014**, *34*, 2001–2011.
294. Wang, Z.; Kong, L.; Kang, J.; Vaughn, D.M.; Bush, G.D.; Walding, A.L.; Grigorian, A.A.; Robinson, J.S.; Nakayama, D.K. Interleukin-1 $\beta$  induces migration of rat arterial smooth muscle cells through a mechanism involving increased matrix metalloproteinase-2 activity. *J. Surg. Res.* **2011**, *169*, 328–336.
295. Gueguen, M.; Keuylian, Z.; Mateo, V.; Mougenot, N.; Lompré, A.-M.; Michel, J.-B.; Meilhac, O.; Lipskaia, L.; Limon, I. Implication of adenylyl cyclase 8 in pathological smooth muscle cell migration occurring in rat and human vascular remodelling. *J. Pathol.* **2010**, *221*, 331–342.
296. Khan, R.; Rheume, E.; Tardif, J.-C. Examining the Role of and Treatment Directed at IL-1 $\beta$  in Atherosclerosis. *Curr. Atheroscler. Rep.* **2018**, *20*, 53.
297. Eun, S.Y.; Ko, Y.S.; Park, S.W.; Chang, K.C.; Kim, H.J. IL-1 $\beta$  enhances vascular smooth muscle cell proliferation and migration via P2Y2 receptor-mediated RAGE expression and HMGB1 release. *Vascul. Pharmacol.* **2015**, *72*, 108–117.
298. Deuell, K.A.; Callegari, A.; Giachelli, C.M.; Rosenfeld, M.E.; Scatena, M. RANKL enhances macrophage paracrine pro-calcific activity in high phosphate-treated smooth muscle cells: Dependence on IL-6 and TNF- $\alpha$ . *J. Vasc. Res.* **2012**, *49*, 510–521.
299. Callegari, A.; Coons, M.L.; Ricks, J.L.; Rosenfeld, M.E.; Scatena, M. Increased Calcification in Osteoprotegerin Deficient Smooth Muscle Cells: Dependence on Receptor Activator of NF- $\kappa$ B Ligand and Interleukin-6. *J. Vasc. Res.* **2014**, *51*, 118–131.
300. Yao, Y.; Watson, A.D.; Ji, S.; Boström, K.I. Heat shock protein 70 enhances vascular bone morphogenetic protein-4 signaling by binding matrix Gla protein. *Circ. Res.* **2009**, *105*, 575–584.
301. Sun, M.; Chang, Q.; Xin, M.; Wang, Q.; Li, H.; Qian, J. Endogenous bone morphogenetic protein 2 plays a role in vascular smooth muscle cell calcification induced by interleukin 6 in vitro. *Int. J. Immunopathol. Pharmacol.* **2017**, *30*, 227–237.

302. Xu, D.; Zeng, F.; Han, L.; Wang, J.; Yin, Z.; Lv, L.; Guo, L.; Wang, D.; Xu, Y.; Zhou, H. The synergistic action of phosphate and interleukin-6 enhances senescence-associated calcification in vascular smooth muscle cells depending on p53. *Mech. Ageing Dev.* **2019**, *182*, 111124.
303. Kurozumi, A.; Nakano, K.; Yamagata, K.; Okada, Y.; Nakayamada, S.; Tanaka, Y. IL-6 and sIL-6R induces STAT3-dependent differentiation of human VSMCs into osteoblast-like cells through JMJD2B-mediated histone demethylation of RUNX2. *Bone* **2019**, *124*, 53–61.
304. Lee Guan-Lin; Yeh Chang-Ching; Wu Jing-Yiing; Lin Hui-Chen; Wang Yi-Fu; Kuo Ya-Yi; Hsieh Yi-Ting; Hsu Yu-Juei; Kuo Cheng-Chin TLR2 Promotes Vascular Smooth Muscle Cell Chondrogenic Differentiation and Consequent Calcification via the Concerted Actions of Osteoprotegerin Suppression and IL-6-Mediated RANKL Induction. *Arterioscler. Thromb. Vasc. Biol.* **2019**, *39*, 432–445.
305. Shavelle, D.M.; Katz, R.; Takasu, J.; Lima, J.A.; Jenny, N.S.; Budoff, M.J.; O'Brien, K.D. Soluble intercellular adhesion molecule-1 (sICAM-1) and aortic valve calcification in the multi-ethnic study of atherosclerosis (MESA). *J. Heart Valve Dis.* **2008**, *17*, 388–395.
306. Takasu, J.; Katz, R.; Shavelle, D.M.; O'Brien, K.; Mao, S.; Carr, J.J.; Cushman, M.; Budoff, M.J. Inflammation and descending thoracic aortic calcification as detected by computed tomography: The Multi-Ethnic Study of Atherosclerosis. *Atherosclerosis* **2008**, *199*, 201–206.
307. Chen, Z.; Qureshi, A.R.; Parini, P.; Hurt-Camejo, E.; Ripsweden, J.; Brismar, T.B.; Barany, P.; Jaminon, A.M.; Schurgers, L.J.; Heimbürger, O.; et al. Does statins promote vascular calcification in chronic kidney disease? *Eur. J. Clin. Invest.* **2017**, *47*, 137–148.
308. Barreto, D.V.; Barreto, F.C.; Liabeuf, S.; Temmar, M.; Lemke, H.-D.; Tribouilloy, C.; Choukroun, G.; Vanholder, R.; Massy, Z.A.; European Uremic Toxin Work Group (EUTox) Plasma interleukin-6 is independently associated with mortality in both hemodialysis and pre-dialysis patients with chronic kidney disease. *Kidney Int.* **2010**, *77*, 550–556.
309. He, J.; Reilly, M.; Yang, W.; Chen, J.; Go, A.S.; Lash, J.P.; Rahman, M.; DeFilippi, C.; Gadegbeku, C.; Kanthety, R.; et al. Risk factors for coronary artery calcium among patients with chronic kidney disease (from the Chronic Renal Insufficiency Cohort Study). *Am. J. Cardiol.* **2012**, *110*, 1735–1741.
310. Bundy, J.D.; Chen, J.; Yang, W.; Budoff, M.; Go, A.S.; Grunwald, J.E.; Kallem, R.R.; Post, W.S.; Reilly, M.P.; Ricardo, A.C.; et al. Risk factors for progression of coronary artery calcification in patients with chronic kidney disease: The CRIC study. *Atherosclerosis* **2018**, *271*, 53–60.
311. Liu, Y.; Shanahan, C.M. Signalling pathways and vascular calcification. *Front. Biosci. Landmark Ed.* **2011**, *16*, 1302–1314.
312. Wassmann, S.; Stumpf, M.; Strehlow, K.; Schmid, A.; Schieffer, B.; Böhm, M.; Nickenig, G. Interleukin-6 induces oxidative stress and endothelial dysfunction by overexpression of the angiotensin II type 1 receptor. *Circ. Res.* **2004**, *94*, 534–541.
313. den Dekker, W.K.; Tempel, D.; Bot, I.; Biessen, E.A.; Joosten, L.A.; Netea, M.G.; van der Meer, J.W.M.; Cheng, C.; Duckers, H.J. Mast cells induce vascular smooth muscle cell apoptosis via a toll-like receptor 4 activation pathway. *Arterioscler. Thromb. Vasc. Biol.* **2012**, *32*, 1960–1969.
314. Wang, Q.; Shu, C.; Su, J.; Li, X. A crosstalk triggered by hypoxia and maintained by MCP-1/miR-98/IL-6/p38 regulatory loop between human aortic smooth muscle cells and macrophages leads to aortic smooth muscle cells apoptosis via Stat1 activation. *Int. J. Clin. Exp. Pathol.* **2015**, *8*, 2670–2679.
315. Knobloch, J.; Yanik, S.D.; Körber, S.; Stoelben, E.; Jungck, D.; Koch, A. TNF $\alpha$ -induced airway smooth muscle cell proliferation depends on endothelin receptor signaling, GM-CSF and IL-6. *Biochem. Pharmacol.* **2016**, *116*, 188–199.
316. Lee, K.-S.; Park, J.-H.; Lee, S.; Lim, H.-J.; Choi, H.-E.; Park, H.-Y. HB-EGF induces delayed STAT3 activation via NF-kappaB mediated IL-6 secretion in vascular smooth muscle cell. *Biochim. Biophys. Acta* **2007**, *1773*, 1637–1644.
317. Xiang, S.; Dong, N.-G.; Liu, J.-P.; Wang, Y.; Shi, J.-W.; Wei, Z.-J.; Hu, X.-J.; Gong, L. Inhibitory effects of suppressor of cytokine signaling 3 on inflammatory cytokine expression and migration and proliferation of IL-6/IFN- $\gamma$ -induced vascular smooth muscle cells. *J. Huazhong Univ. Sci. Technol. Med. Sci. Hua Zhong Ke Ji Xue Xue Bao Yi Xue Ying Wen Ban Huazhong Keji Daxue Xuebao Yixue Yingdewen Ban* **2013**, *33*, 615–622.
318. Yu, H.; Clarke, M.C.H.; Figg, N.; Littlewood, T.D.; Bennett, M.R. Smooth muscle cell apoptosis promotes vessel remodeling and repair via activation of cell migration, proliferation, and collagen synthesis. *Arterioscler. Thromb. Vasc. Biol.* **2011**, *31*, 2402–2409.

319. Wang, Z.; Castresana, M.R.; Newman, W.H. Reactive oxygen and NF-kappaB in VEGF-induced migration of human vascular smooth muscle cells. *Biochem. Biophys. Res. Commun.* **2001**, *285*, 669–674.
320. Wang, Z.; Newman, W.H. Smooth muscle cell migration stimulated by interleukin 6 is associated with cytoskeletal reorganization. *J. Surg. Res.* **2003**, *111*, 261–266.
321. Wang, Z.; Castresana, M.R.; Newman, W.H. NF-kappaB is required for TNF-alpha-directed smooth muscle cell migration. *FEBS Lett.* **2001**, *508*, 360–364.
322. Lee, G.-L.; Chang, Y.-W.; Wu, J.-Y.; Wu, M.-L.; Wu, K.K.; Yet, S.-F.; Kuo, C.-C. TLR 2 induces vascular smooth muscle cell migration through cAMP response element-binding protein-mediated interleukin-6 production. *Arterioscler. Thromb. Vasc. Biol.* **2012**, *32*, 2751–2760.
323. Lee, G.-L.; Wu, J.-Y.; Tsai, C.-S.; Lin, C.-Y.; Tsai, Y.-T.; Lin, C.-S.; Wang, Y.-F.; Yet, S.-F.; Hsu, Y.-J.; Kuo, C.-C. TLR4-Activated MAPK-IL-6 Axis Regulates Vascular Smooth Muscle Cell Function. *Int. J. Mol. Sci.* **2016**, *17*.
324. Sun, W.-W.; Zhu, P.; Shi, Y.-C.; Zhang, C.-L.; Huang, X.-F.; Liang, S.-Y.; Song, Z.-Y.; Lin, S. Current views on neuropeptide Y and diabetes-related atherosclerosis. *Diab. Vasc. Dis. Res.* **2017**, *14*, 277–284.
325. Crnkovic, S.; Egemnazarov, B.; Jain, P.; Seay, U.; Gatteringer, N.; Marsh, L.M.; Bálint, Z.; Kovacs, G.; Ghanim, B.; Klepetko, W.; et al. NPY/Y<sub>1</sub> receptor-mediated vasoconstrictory and proliferative effects in pulmonary hypertension. *Br. J. Pharmacol.* **2014**, *171*, 3895–3907.
326. Pons, J.; Kitlinska, J.; Jacques, D.; Perreault, C.; Nader, M.; Everhart, L.; Zhang, Y.; Zukowska, Z. Interactions of multiple signaling pathways in neuropeptide Y-mediated bimodal vascular smooth muscle cell growth. *Can. J. Physiol. Pharmacol.* **2008**, *86*, 438–448.
327. Zukowska-Grojec, Z.; Pruszczyk, P.; Colton, C.; Yao, J.; Shen, G.H.; Myers, A.K.; Wahlestedt, C. Mitogenic effect of neuropeptide Y in rat vascular smooth muscle cells. *Peptides* **1993**, *14*, 263–268.
328. Zhong, W.; Zeng, G.; Hu, J.; Cai, Y.; Liu, J.; Huang, S.; Chen, M.; Wei, H. [Stimulation of neuropeptide Y on heat shock protein expression in renal vascular smooth muscle and the inhibition thereon by losartan]. *Zhonghua Yi Xue Za Zhi* **2003**, *83*, 515–517.
329. Erlinge, D.; Brunkwall, J.; Edvinsson, L. Neuropeptide Y stimulates proliferation of human vascular smooth muscle cells: Cooperation with noradrenaline and ATP. *Regul. Pept.* **1994**, *50*, 259–265.
330. Zhu, P.; Sun, W.; Zhang, C.; Song, Z.; Lin, S. The role of neuropeptide Y in the pathophysiology of atherosclerotic cardiovascular disease. *Int. J. Cardiol.* **2016**, *220*, 235–241.
331. Zukowska-Grojec, Z.; Karwatowska-Prokopczuk, E.; Fisher, T.A.; Ji, H. Mechanisms of vascular growth-promoting effects of neuropeptide Y: Role of its inducible receptors. *Regul. Pept.* **1998**, *75–76*, 231–238.
332. Zhang, P.; Qi, Y.-X.; Yao, Q.-P.; Chen, X.-H.; Wang, G.-L.; Shen, B.-R.; Han, Y.; Gao, L.-Z.; Jiang, Z.-L. Neuropeptide Y Stimulates Proliferation and Migration of Vascular Smooth Muscle Cells from Pregnancy Hypertensive Rats via Y<sub>1</sub> and Y<sub>5</sub> Receptors. *PLoS ONE* **2015**, *10*, e0131124.
333. Zhou, Y.; Shi, W.; Luo, H.; Yue, R.; Wang, Z.; Wang, W.; Liu, L.; Wang, W.E.; Wang, H.; Zeng, C. Inhibitory effect of D1-like dopamine receptors on neuropeptide Y-induced proliferation in vascular smooth muscle cells. *Hypertens. Res. Off. J. Jpn. Soc. Hypertens.* **2015**, *38*, 807–812.
334. Jiang, Z.-Q.; Zhou, Y.-L.; Chen, X.; Li, L.-Y.; Liang, S.-Y.; Lin, S.; Shu, M.-Q. Different effects of neuropeptide Y on proliferation of vascular smooth muscle cells via regulation of Geminin. *Mol. Cell. Biochem.* **2017**, *433*, 205–211.
335. Xia, X.-W.; Zhou, Y.-Q.; Luo, H.; Zeng, C. Inhibitory effect of D3 dopamine receptors on neuropeptide Y-induced migration in vascular smooth muscle cells. *Mol. Med. Rep.* **2017**, *16*, 5606–5610.
336. Li, L.; Najafi, A.H.; Kitlinska, J.B.; Neville, R.; Laredo, J.; Epstein, S.E.; Burnett, M.S.; Zukowska, Z. Of mice and men: Neuropeptide Y and its receptors are associated with atherosclerotic lesion burden and vulnerability. *J. Cardiovasc. Transl. Res.* **2011**, *4*, 351–362.
337. Lagraauw, H.M.; Westra, M.M.; Bot, M.; Wezel, A.; van Santbrink, P.J.; Pasterkamp, G.; Biessen, E.A.L.; Kuiper, J.; Bot, I. Vascular neuropeptide Y contributes to atherosclerotic plaque progression and perivascular mast cell activation. *Atherosclerosis* **2014**, *235*, 196–203.
338. Carrillo-López, N.; Panizo, S.; Alonso-Montes, C.; Martínez-Arias, L.; Avello, N.; Sosa, P.; Dusso, A.S.; Cannata-Andía, J.B.; Naves-Díaz, M. High-serum phosphate and parathyroid hormone distinctly regulate bone loss and vascular calcification in experimental chronic kidney disease. *Nephrol. Dial. Transplant. Off. Publ. Eur. Dial. Transpl. Assoc. —Eur. Ren. Assoc.* **2019**, *34*, 934–941.

339. Patidar, A.; Singh, D.K.; Winocour, P.; Farrington, K.; Baydoun, A.R. Human uraemic serum displays calcific potential in vitro that increases with advancing chronic kidney disease. *Clin. Sci. Lond. Engl.* **1979** *2013*, *125*, 237–245.
340. Gracioli, F.G.; Neves, K.R.; dos Reis, L.M.; Gracioli, R.G.; Noronha, I.L.; Moysés, R.M.A.; Jorgetti, V. Phosphorus overload and PTH induce aortic expression of Runx2 in experimental uraemia. *Nephrol. Dial. Transplant. Off. Publ. Eur. Dial. Transpl. Assoc. — Eur. Ren. Assoc.* **2009**, *24*, 1416–1421.
341. Neves, K.R.; Gracioli, F.G.; dos Reis, L.M.; Gracioli, R.G.; Neves, C.L.; Magalhães, A.O.; Custódio, M.R.; Batista, D.G.; Jorgetti, V.; Moysés, R.M.A. Vascular calcification: Contribution of parathyroid hormone in renal failure. *Kidney Int.* **2007**, *71*, 1262–1270.
342. Cheng, S.-L.; Shao, J.-S.; Halstead, L.R.; Distelhorst, K.; Sierra, O.; Towler, D.A. Activation of vascular smooth muscle parathyroid hormone receptor inhibits Wnt/beta-catenin signaling and aortic fibrosis in diabetic arteriosclerosis. *Circ. Res.* **2010**, *107*, 271–282.
343. Shao, J.-S.; Cheng, S.-L.; Charlton-Kachigian, N.; Loewy, A.P.; Towler, D.A. Teriparatide (human parathyroid hormone (1-34)) inhibits osteogenic vascular calcification in diabetic low density lipoprotein receptor-deficient mice. *J. Biol. Chem.* **2003**, *278*, 50195–50202.
344. Malluche, H.H.; Blomquist, G.; Monier-Faugere, M.-C.; Cantor, T.L.; Davenport, D.L. High Parathyroid Hormone Level and Osteoporosis Predict Progression of Coronary Artery Calcification in Patients on Dialysis. *J. Am. Soc. Nephrol. JASN* **2015**, *26*, 2534–2544.
345. Gulcicek, S.; Zoccali, C.; Olgun, D.Ç.; Tripepi, G.; Alagoz, S.; Yalin, S.F.; Trabulus, S.; Altiparmak, M.R.; Seyahi, N. Long-Term Progression of Coronary Artery Calcification Is Independent of Classical Risk Factors, C-Reactive Protein, and Parathyroid Hormone in Renal Transplant Patients. *Cardiorenal Med.* **2017**, *7*, 284–294.
346. Perkovic, V.; Hewitson, T.D.; Kelynack, K.J.; Martic, M.; Tait, M.G.; Becker, G.J. Parathyroid hormone has a pro-sclerotic effect on vascular smooth muscle cells. *Kidney Blood Press. Res.* **2003**, *26*, 27–33.
347. Sauro, M.D.; Zorn, N.E. Prolactin induces proliferation of vascular smooth muscle cells through a protein kinase C-dependent mechanism. *J. Cell. Physiol.* **1991**, *148*, 133–138.
348. Zhang, Y.; Cincotta, A.H. Inhibitory effects of bromocriptine on vascular smooth muscle cell proliferation. *Atherosclerosis* **1997**, *133*, 37–44.
349. Gan, A.M.; Pirvulescu, M.M.; Stan, D.; Simion, V.; Calin, M.; Manduteanu, I.; Butoi, E. Monocytes and smooth muscle cells cross-talk activates STAT3 and induces resistin and reactive oxygen species production [corrected]. *J. Cell. Biochem.* **2013**, *114*, 2273–2283.
350. Raghuraman, G.; Zuniga, M.C.; Yuan, H.; Zhou, W. PKC $\epsilon$  mediates resistin-induced NADPH oxidase activation and inflammation leading to smooth muscle cell dysfunction and intimal hyperplasia. *Atherosclerosis* **2016**, *253*, 29–37.
351. Gan, A.-M.; Butoi, E.D.; Manea, A.; Simion, V.; Stan, D.; Parvulescu, M.-M.; Calin, M.; Manduteanu, I.; Simionescu, M. Inflammatory effects of resistin on human smooth muscle cells: Up-regulation of fractalkine and its receptor, CX3CR1 expression by TLR4 and Gi-protein pathways. *Cell Tissue Res.* **2013**, *351*, 161–174.
352. Cho, Y.; Lee, S.-E.; Lee, H.-C.; Hur, J.; Lee, S.; Youn, S.-W.; Lee, J.; Lee, H.-J.; Lee, T.-K.; Park, J.; et al. Adipokine resistin is a key player to modulate monocytes, endothelial cells, and smooth muscle cells, leading to progression of atherosclerosis in rabbit carotid artery. *J. Am. Coll. Cardiol.* **2011**, *57*, 99–109.
353. Zuniga, M.C.; Raghuraman, G.; Zhou, W. Physiologic levels of resistin induce a shift from proliferation to apoptosis in macrophage and VSMC co-culture. *Surgery* **2018**, *163*, 906–911.
354. Park, H.K.; Ahima, R.S. Resistin in rodents and humans. *Diabetes Metab. J.* **2013**, *37*, 404–414.
355. Jamaluddin, M.S.; Weakley, S.M.; Yao, Q.; Chen, C. Resistin: Functional roles and therapeutic considerations for cardiovascular disease. *Br. J. Pharmacol.* **2012**, *165*, 622–632.
356. Calabro, P.; Samudio, I.; Willerson, J.T.; Yeh, E.T.H. Resistin promotes smooth muscle cell proliferation through activation of extracellular signal-regulated kinase 1/2 and phosphatidylinositol 3-kinase pathways. *Circulation* **2004**, *110*, 3335–3340.
357. Kang, S.-W.; Kim, J.-L.; Kwon, G.T.; Lee, Y.-J.; Park, J.H.Y.; Lim, S.S.; Kang, Y.-H. Sensitive fern (*Onoclea sensibilis*) extract suppresses proliferation and migration of vascular smooth muscle cells inflamed by neighboring macrophages. *Biol. Pharm. Bull.* **2011**, *34*, 1717–1723.

358. Hirai, H.; Satoh, H.; Kudoh, A.; Watanabe, T. Interaction between resistin and adiponectin in the proliferation of rat vascular smooth muscle cells. *Mol. Cell. Endocrinol.* **2013**, *366*, 108–116.
359. Park, H.K.; Kwak, M.K.; Kim, H.J.; Ahima, R.S. Linking resistin, inflammation, and cardiometabolic diseases. *Korean, J. Intern. Med.* **2017**, *32*, 239–247.
360. Zuniga, M.C.; Raghuraman, G.; Zhou, W. Physiologic levels of resistin induce a shift from proliferation to apoptosis in macrophage and VSMC co-culture. *Surgery* **2018**, *163*, 906–911.
361. Jung, H.S.; Park, K.-H.; Cho, Y.M.; Chung, S.S.; Cho, H.J.; Cho, S.Y.; Kim, S.J.; Kim, S.Y.; Lee, H.K.; Park, K.S. Resistin is secreted from macrophages in atheromas and promotes atherosclerosis. *Cardiovasc. Res.* **2006**, *69*, 76–85.
362. Ding, Q.; Chai, H.; Mahmood, N.; Tsao, J.; Mochly-Rosen, D.; Zhou, W. Matrix metalloproteinases modulated by protein kinase C $\epsilon$  mediate resistin-induced migration of human coronary artery smooth muscle cells. *J. Vasc. Surg.* **2011**, *53*, 1044–1051.
363. Lee, H.M.; Kim, H.J.; Won, K.-J.; Choi, W.S.; Lee, K.-Y.; Bae, Y.M.; Park, P.-J.; Park, T.-K.; Lee, Y.L.; Lee, C.-K.; et al. Contribution of soluble intercellular adhesion molecule-1 to the migration of vascular smooth muscle cells. *Eur. J. Pharmacol.* **2008**, *579*, 260–268.
364. Payan, D.G. Receptor-mediated mitogenic effects of substance P on cultured smooth muscle cells. *Biochem. Biophys. Res. Commun.* **1985**, *130*, 104–109.
365. Yang, C.-M.; Hsiao, L.-D.; Chien, C.-S.; Lin, C.-C.; Luo, S.-F.; Wang, C.-C. Substance P-induced activation of p42/44 mitogen-activated protein kinase associated with cell proliferation in human tracheal smooth muscle cells. *Cell. Signal.* **2002**, *14*, 913–923.
366. Yamauchi, H.; Motomura, N.; Chung, U.-I.; Sata, M.; Takai, D.; Saito, A.; Ono, M.; Takamoto, S. Growth-associated hyperphosphatemia in young recipients accelerates aortic allograft calcification in a rat model. *J. Thorac. Cardiovasc. Surg.* **2013**, *145*, 522–530.
367. Kawada, S.; Nagasawa, Y.; Kawabe, M.; Ohyama, H.; Kida, A.; Kato-Kogoe, N.; Nanami, M.; Hasuike, Y.; Kuragano, T.; Kishimoto, H.; et al. Iron-induced calcification in human aortic vascular smooth muscle cells through interleukin-24 (IL-24), with/without TNF-alpha. *Sci. Rep.* **2018**, *8*, 658.
368. Shioi, A.; Katagi, M.; Okuno, Y.; Mori, K.; Jono, S.; Koyama, H.; Nishizawa, Y. Induction of bone-type alkaline phosphatase in human vascular smooth muscle cells: Roles of tumor necrosis factor-alpha and oncostatin M derived from macrophages. *Circ. Res.* **2002**, *91*, 9–16.
369. Lee, H.-L.; Woo, K.M.; Ryoo, H.-M.; Baek, J.-H. Tumor necrosis factor-alpha increases alkaline phosphatase expression in vascular smooth muscle cells via MSX2 induction. *Biochem. Biophys. Res. Commun.* **2010**, *391*, 1087–1092.
370. Aghagolzadeh, P.; Bachtler, M.; Bijarnia, R.; Jackson, C.; Smith, E.R.; Odermatt, A.; Radpour, R.; Pasch, A. Calcification of vascular smooth muscle cells is induced by secondary calciprotein particles and enhanced by tumor necrosis factor- $\alpha$ . *Atherosclerosis* **2016**, *251*, 404–414.
371. Ye, Y.; Bian, W.; Fu, F.; Hu, J.; Liu, H. Selenoprotein S inhibits inflammation-induced vascular smooth muscle cell calcification. *J. Biol. Inorg. Chem. JBIC Publ. Soc. Biol. Inorg. Chem.* **2018**, *23*, 739–751.
372. Zickler, D.; Luecht, C.; Willy, K.; Chen, L.; Witowski, J.; Girndt, M.; Fiedler, R.; Storr, M.; Kamhieh-Milz, J.; Schoon, J.; et al. Tumour necrosis factor-alpha in uraemic serum promotes osteoblastic transition and calcification of vascular smooth muscle cells via extracellular signal-regulated kinases and activator protein 1/c-FOS-mediated induction of interleukin 6 expression. *Nephrol. Dial. Transplant. Off. Publ. Eur. Dial. Transpl. Assoc. — Eur. Ren. Assoc.* **2018**, *33*, 574–585.
373. García-Miguel, M.; Riquelme, J.A.; Norambuena-Soto, I.; Morales, P.E.; Sanhueza-Olivares, F.; Nuñez-Soto, C.; Mondaca-Ruff, D.; Cancino-Arenas, N.; San Martín, A.; Chiong, M. Autophagy mediates tumor necrosis factor- $\alpha$ -induced phenotype switching in vascular smooth muscle A7r5 cell line. *PLoS ONE* **2018**, *13*, e0197210.
374. Freise, C.; Querfeld, U. The lignan (+)-episesamin interferes with TNF- $\alpha$ -induced activation of VSMC via diminished activation of NF- $\kappa$ B, ERK1/2 and AKT and decreased activity of gelatinases. *Acta Physiol. Oxf. Engl.* **2015**, *213*, 642–652.
375. Chatterjee, A.; Sharma, A.; Chen, M.; Toy, R.; Mottola, G.; Conte, M.S. The pro-resolving lipid mediator maresin 1 (MaR1) attenuates inflammatory signaling pathways in vascular smooth muscle and endothelial cells. *PLoS ONE* **2014**, *9*, e113480.

376. Park, B.; Yim, J.-H.; Lee, H.-K.; Kim, B.-O.; Pyo, S. Ramalin inhibits VCAM-1 expression and adhesion of monocyte to vascular smooth muscle cells through MAPK and PADI4-dependent NF- $\kappa$ B and AP-1 pathways. *Biosci. Biotechnol. Biochem.* **2015**, *79*, 539–552.
377. Lee, Y.J.; Yoon, J.J.; Lee, S.M.; Kim, J.S.; Kang, D.G.; Lee, H.S. Inhibitory effect of Zanthoxylum schinifolium on vascular smooth muscle proliferation. *Immunopharmacol. Immunotoxicol.* **2012**, *34*, 354–361.
378. Cao, Q.; Jiang, Y.; Shi, J.; Xu, C.; Liu, X.; Yang, T.; Fu, P.; Niu, T. Artemisinin inhibits the proliferation, migration, and inflammatory reaction induced by tumor necrosis factor- $\alpha$  in vascular smooth muscle cells through nuclear factor kappa B pathway. *J. Surg. Res.* **2015**, *194*, 667–678.
379. Jiang, F.; Jiang, R.; Zhu, X.; Zhang, X.; Zhan, Z. Genipin inhibits TNF- $\alpha$ -induced vascular smooth muscle cell proliferation and migration via induction of HO-1. *PLoS ONE* **2013**, *8*, e74826.
380. Kazama, K.; Usui, T.; Okada, M.; Hara, Y.; Yamawaki, H. Omentin plays an anti-inflammatory role through inhibition of TNF- $\alpha$ -induced superoxide production in vascular smooth muscle cells. *Eur. J. Pharmacol.* **2012**, *686*, 116–123.
381. Choi, H.; Dikalova, A.; Stark, R.J.; Lamb, F.S. c-Jun N-terminal kinase attenuates TNF $\alpha$  signaling by reducing Nox1-dependent endosomal ROS production in vascular smooth muscle cells. *Free Radic. Biol. Med.* **2015**, *86*, 219–227.
382. Byeon, H.-E.; Park, B.-K.; Yim, J.H.; Lee, H.K.; Moon, E.-Y.; Rhee, D.-K.; Pyo, S. Stereocalpin A inhibits the expression of adhesion molecules in activated vascular smooth muscle cells. *Int. Immunopharmacol.* **2012**, *12*, 315–325.
383. Liu, J.; Zhang, L.; Ren, Y.; Gao, Y.; Kang, L.; Lu, S. Matrine inhibits the expression of adhesion molecules in activated vascular smooth muscle cells. *Mol. Med. Rep.* **2016**, *13*, 2313–2319.
384. Yan, X.; Wu, L.; Li, B.; Meng, X.; Dai, H.; Zheng, Y.; Fu, J. Cyanidin-3-O-glucoside Induces Apoptosis and Inhibits Migration of Tumor Necrosis Factor- $\alpha$ -Treated Rat Aortic Smooth Muscle Cells. *Cardiovasc. Toxicol.* **2016**, *16*, 251–259.
385. Yan, L.-J.; Yang, H.-T.; Duan, H.-Y.; Wu, J.-T.; Qian, P.; Fan, X.-W.; Wang, S. Myricitrin inhibits vascular adhesion molecule expression in TNF- $\alpha$ -stimulated vascular smooth muscle cells. *Mol. Med. Rep.* **2017**, *16*, 6354–6359.
386. Liu, S.; Lv, J.; Han, L.; Ichikawa, T.; Wang, W.; Li, S.; Wang, X.L.; Tang, D.; Cui, T. A pro-inflammatory role of deubiquitinating enzyme cylindromatosis (CYLD) in vascular smooth muscle cells. *Biochem. Biophys. Res. Commun.* **2012**, *420*, 78–83.
387. Ali, M.S.; Starke, R.M.; Jabbour, P.M.; Tjoumakaris, S.I.; Gonzalez, L.F.; Rosenwasser, R.H.; Owens, G.K.; Koch, W.J.; Greig, N.H.; Dumont, A.S. TNF- $\alpha$  induces phenotypic modulation in cerebral vascular smooth muscle cells: Implications for cerebral aneurysm pathology. *J. Cereb. Blood Flow Metab. Off. J. Int. Soc. Cereb. Blood Flow Metab.* **2013**, *33*, 1564–1573.
388. Park, S.H.; Koo, H.J.; Sung, Y.Y.; Kim, H.K. The protective effect of Prunella vulgaris ethanol extract against vascular inflammation in TNF- $\alpha$ -stimulated human aortic smooth muscle cells. *BMB Rep.* **2013**, *46*, 352–357.
389. Chen, S.; Ding, Y.; Tao, W.; Zhang, W.; Liang, T.; Liu, C. Naringenin inhibits TNF- $\alpha$  induced VSMC proliferation and migration via induction of HO-1. *Food Chem. Toxicol. Int. J. Publ. Br. Ind. Biol. Res. Assoc.* **2012**, *50*, 3025–3031.
390. Butoi, E.D.; Gan, A.M.; Manduteanu, I.; Stan, D.; Calin, M.; Pirvulescu, M.; Koenen, R.R.; Weber, C.; Simionescu, M. Cross talk between smooth muscle cells and monocytes/activated monocytes via CX3CL1/CX3CR1 axis augments expression of pro-atherogenic molecules. *Biochim. Biophys. Acta* **2011**, *1813*, 2026–2035.
391. Shu, Y.-N.; Dong, L.-H.; Li, H.; Pei, Q.-Q.; Miao, S.-B.; Zhang, F.; Zhang, D.-D.; Chen, R.; Yin, Y.-J.; Lin, Y.-L.; et al. CKII-SIRT1-SM22 $\alpha$  loop evokes a self-limited inflammatory response in vascular smooth muscle cells. *Cardiovasc. Res.* **2017**, *113*, 1198–1207.
392. Tang, M.; Fang, J. TNF- $\alpha$  regulates apoptosis of human vascular smooth muscle cells through gap junctions. *Mol. Med. Rep.* **2017**, *15*, 1407–1411.
393. Cao, Q.; Jiang, Y.; Shi, J.; Liu, X.; Chen, J.; Niu, T.; Li, X. Artemisinin inhibits tumour necrosis factor- $\alpha$ -induced vascular smooth muscle cell proliferation in vitro and attenuates balloon injury-induced neointima formation in rats. *Clin. Exp. Pharmacol. Physiol.* **2015**, *42*, 502–509.
394. Rho, M.-C.; Ah Lee, K.; Mi Kim, S.; Sik Lee, C.; Jeong Jang, M.; Kook Kim, Y.; Sun Lee, H.; Hyun Choi, Y.; Yong Rhim, B.; Kim, K. Sensitization of vascular smooth muscle cell to TNF- $\alpha$ -mediated death in the presence of palmitate. *Toxicol. Appl. Pharmacol.* **2007**, *220*, 311–319.

395. Boyle, J.J.; Weissberg, P.L.; Bennett, M.R. Tumor necrosis factor-alpha promotes macrophage-induced vascular smooth muscle cell apoptosis by direct and autocrine mechanisms. *Arterioscler. Thromb. Vasc. Biol.* **2003**, *23*, 1553–1558.
396. Zhang, T.; Yang, Z.; Bo, X.; Wu, X.; Li, Z.; Guo, S. [Cathepsin B promoted the apoptosis of vascular smooth muscle cells as induced by tumor necrosis factor- $\alpha$ ]. *Zhonghua Yi Xue Za Zhi* **2011**, *91*, 845–849.
397. Lee, H.S.; Chang, J.S.; Baek, J.A.; Chung, M.Y.; Lee, H.C.; Rhim, B.Y.; Sok, D.E.; Rho, M.-C.; Kim, Y.K.; Kim, K. TNF-alpha activates death pathway in human aorta smooth muscle cell in the presence of 7-ketocholesterol. *Biochem. Biophys. Res. Commun.* **2005**, *333*, 1093–1099.
398. Wang, Z.; Rao, P.J.; Castresana, M.R.; Newman, W.H. TNF-alpha induces proliferation or apoptosis in human saphenous vein smooth muscle cells depending on phenotype. *Am. J. Physiol. Heart Circ. Physiol.* **2005**, *288*, H293–H301.
399. Hans, C.P.; Zerfaoui, M.; Naura, A.S.; Catling, A.; Boulares, A.H. Differential effects of PARP inhibition on vascular cell survival and ACAT-1 expression favouring atherosclerotic plaque stability. *Cardiovasc. Res.* **2008**, *78*, 429–439.
400. Zhan, M.; Yuan, F.; Liu, H.; Chen, H.; Qiu, X.; Fang, W. Inhibition of proliferation and apoptosis of vascular smooth muscle cells by ghrelin. *Acta Biochim. Biophys. Sin.* **2008**, *40*, 769–776.
401. Tang, V.; Dhirapong, A.; Yabes, A.P.; Weiss, R.H. TNF-alpha-mediated apoptosis in vascular smooth muscle cells requires p73. *Am. J. Physiol. Cell Physiol.* **2005**, *289*, C199–C206.
402. Giordano, A.; Romano, S.; Nappo, G.; Messina, S.; Polimeno, M.; Corcione, N.; Cali, G.; Ferraro, P.; Monaco, M.; Zambrano, N.; et al. Atorvastatin sensitises vascular smooth muscle cells, but not endothelial cells, to TNF- $\alpha$ -induced cell death. *Curr. Pharm. Des.* **2012**, *18*, 6331–6338.
403. Jin, Y.-H.; Kim, S.-A. 2-Methoxycinnamaldehyde inhibits the TNF- $\alpha$ -induced proliferation and migration of human aortic smooth muscle cells. *Int. J. Mol. Med.* **2017**, *39*, 191–198.
404. Li, H.; Cheng, Y.; Simoncini, T.; Xu, S. 17 $\beta$ -Estradiol inhibits TNF- $\alpha$ -induced proliferation and migration of vascular smooth muscle cells via suppression of TRAIL. *Gynecol. Endocrinol. Off. J. Int. Soc. Gynecol. Endocrinol.* **2016**, *32*, 581–586.
405. Heo, S.-K.; Yun, H.-J.; Park, W.-H.; Park, S.-D. Rhein inhibits TNF-alpha-induced human aortic smooth muscle cell proliferation via mitochondrial-dependent apoptosis. *J. Vasc. Res.* **2009**, *46*, 375–386.
406. Qi, L.; Zhi, J.; Zhang, T.; Cao, X.; Sun, L.; Xu, Y.; Li, X. Inhibition of microRNA-25 by tumor necrosis factor  $\alpha$  is critical in the modulation of vascular smooth muscle cell proliferation. *Mol. Med. Rep.* **2015**, *11*, 4353–4358.
407. Kang, Y.H.; Yang, I.J.; Shin, H.M. Herbal formula HMC05 prevents human aortic smooth muscle cell migration and proliferation by inhibiting the ERK1/2 MAPK signaling cascade. *J. Nat. Med.* **2012**, *66*, 177–184.
408. Lee, E.-J.; Kim, D.-I.; Kim, W.-J.; Moon, S.-K. Naringin inhibits matrix metalloproteinase-9 expression and AKT phosphorylation in tumor necrosis factor-alpha-induced vascular smooth muscle cells. *Mol. Nutr. Food Res.* **2009**, *53*, 1582–1591.
409. Li, H.; Liang, J.; Castrillon, D.H.; DePinho, R.A.; Olson, E.N.; Liu, Z.-P. FoxO4 regulates tumor necrosis factor alpha-directed smooth muscle cell migration by activating matrix metalloproteinase 9 gene transcription. *Mol. Cell. Biol.* **2007**, *27*, 2676–2686.
410. Rajesh, M.; Mukhopadhyay, P.; Haskó, G.; Huffman, J.W.; Mackie, K.; Pacher, P. CB2 cannabinoid receptor agonists attenuate TNF-alpha-induced human vascular smooth muscle cell proliferation and migration. *Br. J. Pharmacol.* **2008**, *153*, 347–357.
411. Coll-Bonfill, N.; Peinado, V.I.; Pisano, M.V.; Párrizas, M.; Blanco, I.; Evers, M.; Engelmann, J.C.; García-Lucio, J.; Tura-Ceide, O.; Meister, G.; et al. Slug Is Increased in Vascular Remodeling and Induces a Smooth Muscle Cell Proliferative Phenotype. *PLoS ONE* **2016**, *11*, e0159460.
412. Mattana, J.; Effiong, C.; Kapasi, A.; Singhal, P.C. Leukocyte-polytetrafluoroethylene interaction enhances proliferation of vascular smooth muscle cells via tumor necrosis factor-alpha secretion. *Kidney Int.* **1997**, *52*, 1478–1485.
413. Fan, S.; Li, X.; Lin, J.; Chen, S.; Shan, J.; Qi, G. Honokiol inhibits tumor necrosis factor- $\alpha$ -stimulated rat aortic smooth muscle cell proliferation via caspase- and mitochondrial-dependent apoptosis. *Inflammation* **2014**, *37*, 17–26.

414. Suh, S.-J.; Kwak, C.-H.; Chung, T.-W.; Park, S.J.; Chee, M.; Park, S.-S.; Seo, C.-S.; Son, J.-K.; Chang, Y.-C.; Park, Y.-G.; et al. Pimaric acid from *Aralia cordata* has an inhibitory effect on TNF- $\alpha$ -induced MMP-9 production and HASMC migration via down-regulated NF- $\kappa$ B and AP-1. *Chem. Biol. Interact.* **2012**, *199*, 112–119.
415. Goetze, S.; Xi, X.P.; Kawano, Y.; Kawano, H.; Fleck, E.; Hsueh, W.A.; Law, R.E. TNF-alpha-induced migration of vascular smooth muscle cells is MAPK dependent. *Hypertens. Dallas Tex 1979* **1999**, *33*, 183–189.
416. Kim, J.; Ko, J. Human sLZIP promotes atherosclerosis via MMP-9 transcription and vascular smooth muscle cell migration. *FASEB J. Off. Publ. Fed. Am. Soc. Exp. Biol.* **2014**, *28*, 5010–5021.
417. Lee, S.-O.; Chang, Y.-C.; Whang, K.; Kim, C.-H.; Lee, I.-S. Role of NAD(P)H:quinone oxidoreductase 1 on tumor necrosis factor-alpha-induced migration of human vascular smooth muscle cells. *Cardiovasc. Res.* **2007**, *76*, 331–339.
418. Yu, Y.-M.; Lin, H.-C. Curcumin prevents human aortic smooth muscle cells migration by inhibiting of MMP-9 expression. *Nutr. Metab. Cardiovasc. Dis. NMCD* **2010**, *20*, 125–132.
419. Kaga, T.; Kawano, H.; Sakaguchi, M.; Nakazawa, T.; Taniyama, Y.; Morishita, R. Hepatocyte growth factor stimulated angiogenesis without inflammation: Differential actions between hepatocyte growth factor, vascular endothelial growth factor and basic fibroblast growth factor. *Vascul. Pharmacol.* **2012**, *57*, 3–9.
420. Xu, Y.-G.; Zhou, S.-H.; Li, Y.-G.; Zheng, C.-H.; Li, X.-P.; Liu, Q.-M.; Xu, D.-M.; Chen, S. The mechanism underlying vascular smooth muscle cell apoptosis induced by atorvastatin may be mainly associated with down-regulation of survivin expression. *Cardiovasc. Drugs Ther.* **2007**, *21*, 145–153.
421. Shi, X.; Guo, L.-W.; Seedial, S.M.; Si, Y.; Wang, B.; Takayama, T.; Suwanabol, P.A.; Ghosh, S.; DiRenzo, D.; Liu, B.; et al. TGF- $\beta$ /Smad3 inhibit vascular smooth muscle cell apoptosis through an autocrine signaling mechanism involving VEGF-A. *Cell Death Dis.* **2014**, *5*, e1317.
422. Pei, Q.-M.; Jiang, P.; Yang, M.; Qian, X.-J.; Liu, J.-B.; Kim, S.-H. Roxithromycin inhibits VEGF-induced human airway smooth muscle cell proliferation: Opportunities for the treatment of asthma. *Exp. Cell Res.* **2016**, *347*, 378–384.
423. Liao, X.H.; Xiang, Y.; Li, H.; Zheng, D.L.; Xu, Y.; Xi Yu, C.; Li, J.P.; Zhang, X.Y.; Xing, W.B.; Cao, D.S.; et al. VEGF-A Stimulates STAT3 Activity via Nitrosylation of Myocardin to Regulate the Expression of Vascular Smooth Muscle Cell Differentiation Markers. *Sci. Rep.* **2017**, *7*, 2660.
424. Kim, S.-H.; Pei, Q.-M.; Jiang, P.; Yang, M.; Qian, X.-J.; Liu, J.-B. Effect of active vitamin D3 on VEGF-induced ADAM33 expression and proliferation in human airway smooth muscle cells: Implications for asthma treatment. *Respir. Res.* **2017**, *18*, 7.
425. Weatherford, D.A.; Sackman, J.E.; Reddick, T.T.; Freeman, M.B.; Stevens, S.L.; Goldman, M.H. Vascular endothelial growth factor and heparin in a biologic glue promotes human aortic endothelial cell proliferation with aortic smooth muscle cell inhibition. *Surgery* **1996**, *120*, 433–439.
426. Parenti, A.; Bellik, L.; Brogelli, L.; Filippi, S.; Ledda, F. Endogenous VEGF-A is responsible for mitogenic effects of MCP-1 on vascular smooth muscle cells. *Am. J. Physiol. Heart Circ. Physiol.* **2004**, *286*, H1978–H1984.
427. Kim, S.-H.; Pei, Q.-M.; Jiang, P.; Yang, M.; Qian, X.-J.; Liu, J.-B. Role of licochalcone A in VEGF-induced proliferation of human airway smooth muscle cells: Implications for asthma. *Growth Factors Chur Switz.* **2017**, *35*, 39–47.
428. Wan, J.; Lata, C.; Santilli, A.; Green, D.; Roy, S.; Santilli, S. Supplemental oxygen reverses hypoxia-induced smooth muscle cell proliferation by modulating HIF-alpha and VEGF levels in a rabbit arteriovenous fistula model. *Ann. Vasc. Surg.* **2014**, *28*, 725–736.
429. Schlich, R.; Willems, M.; Greulich, S.; Ruppe, F.; Knoefel, W.T.; Ouwens, D.M.; Maxhera, B.; Lichtenberg, A.; Eckel, J.; Sell, H. VEGF in the crosstalk between human adipocytes and smooth muscle cells: Depot-specific release from visceral and perivascular adipose tissue. *Mediators Inflamm.* **2013**, *2013*, 982458.
430. Liao, X.-H.; Wang, N.; Zhao, D.-W.; Zheng, D.-L.; Zheng, L.; Xing, W.-J.; Ma, W.-J.; Bao, L.-Y.; Dong, J.; Zhang, T.-C. STAT3 Protein Regulates Vascular Smooth Muscle Cell Phenotypic Switch by Interaction with Myocardin. *J. Biol. Chem.* **2015**, *290*, 19641–19652.
431. Li, Y.; McRobb, L.S.; Khachigian, L.M. Inhibition of intimal thickening after vascular injury with a cocktail of vascular endothelial growth factor and cyclic Arg-Gly-Asp peptide. *Int. J. Cardiol.* **2016**, *220*, 185–191.
432. Yang, G.Y.; Yao, J.S.; Huey, M.; Hashimoto, T.; Young, W.L. Participation of PI3K and ERK1/2 pathways are required for human brain vascular smooth muscle cell migration. *Neurochem. Int.* **2004**, *44*, 441–446.



433. Banerjee, S.; Mehta, S.; Haque, I.; Sengupta, K.; Dhar, K.; Kambhampati, S.; Van Veldhuizen, P.J.; Banerjee, S.K. VEGF-A165 induces human aortic smooth muscle cell migration by activating neuropilin-1-VEGFR1-PI3K axis. *Biochemistry* **2008**, *47*, 3345–3351.
434. Yao, J.S.; Chen, Y.; Zhai, W.; Xu, K.; Young, W.L.; Yang, G.-Y. Minocycline exerts multiple inhibitory effects on vascular endothelial growth factor-induced smooth muscle cell migration: The role of ERK1/2, PI3K, and matrix metalloproteinases. *Circ. Res.* **2004**, *95*, 364–371.
435. Grosskreutz, C.L.; Anand-Apte, B.; Dupláa, C.; Quinn, T.P.; Terman, B.I.; Zetter, B.; D'Amore, P.A. Vascular endothelial growth factor-induced migration of vascular smooth muscle cells in vitro. *Microvasc. Res.* **1999**, *58*, 128–136.
436. Wang, H.; Keiser, J.A. Vascular endothelial growth factor upregulates the expression of matrix metalloproteinases in vascular smooth muscle cells: Role of flt-1. *Circ. Res.* **1998**, *83*, 832–840.
437. Ho-Tin-Noé, B.; Le Dall, J.; Gomez, D.; Louedec, L.; Vranckx, R.; El-Bouchtaoui, M.; Legrès, L.; Meilhac, O.; Michel, J.-B. Early atheroma-derived agonists of peroxisome proliferator-activated receptor- $\gamma$  trigger intramedial angiogenesis in a smooth muscle cell-dependent manner. *Circ. Res.* **2011**, *109*, 1003–1014.
438. Benitez, R.; Delgado-Maroto, V.; Caro, M.; Forte-Lago, I.; Duran-Prado, M.; O'Valle, F.; Lichtman, A.H.; Gonzalez-Rey, E.; Delgado, M. Vasoactive Intestinal Peptide Ameliorates Acute Myocarditis and Atherosclerosis by Regulating Inflammatory and Autoimmune Responses. *J. Immunol. Baltim. Md 1950* **2018**, *200*, 3697–3710.
439. Li, W.; Hamada, Y.; Nakashima, E.; Naruse, K.; Kamiya, H.; Akiyama, N.; Hirooka, H.; Takahashi, N.; Horiuchi, S.; Hotta, N.; et al. Suppression of 3-deoxyglucosone and heparin-binding epidermal growth factor-like growth factor mRNA expression by an aldose reductase inhibitor in rat vascular smooth muscle cells. *Biochem. Biophys. Res. Commun.* **2004**, *314*, 370–376.
440. Partridge, C.R.; Williams, E.S.; Barhoumi, R.; Tadesse, M.G.; Johnson, C.D.; Lu, K.P.; Meininger, G.A.; Wilson, E.; Ramos, K.S. Novel genomic targets in oxidant-induced vascular injury. *J. Mol. Cell. Cardiol.* **2005**, *38*, 983–996.
441. Newaz, M.; Yousefipour, Z. Acrolein-induced inflammatory signaling in vascular smooth muscle cells requires activation of serum response factor (SRF) and NF $\kappa$ B. *J. Basic Clin. Physiol. Pharmacol.* **2013**, *24*, 287–297.
442. Haldar, S.; Dru, C.; Choudhury, D.; Mishra, R.; Fernandez, A.; Biondi, S.; Liu, Z.; Shimada, K.; Ardit, M.; Bhowmick, N.A. Inflammation and pyroptosis mediate muscle expansion in an interleukin-1 $\beta$  (IL-1 $\beta$ )-dependent manner. *J. Biol. Chem.* **2015**, *290*, 6574–6583.
443. Chen, L.; Wu, X.; Zeb, F.; Huang, Y.; An, J.; Jiang, P.; Chen, A.; Xu, C.; Feng, Q. Acrolein-induced apoptosis of smooth muscle cells through NEAT1-Bmal1/Clock pathway and a protection from asparagus extract. *Environ. Pollut. Barking Essex 1987* **2020**, *258*, 113735.
444. Dong, Y.; Noda, K.; Murata, M.; Yoshida, S.; Saito, W.; Kanda, A.; Ishida, S. Localization of Acrolein-Lysine Adduct in Fibrovascular Tissues of Proliferative Diabetic Retinopathy. *Curr. Eye Res.* **2017**, *42*, 111–117.
445. Vindis, C.; Escargueil-Blanc, I.; Uchida, K.; Elbaz, M.; Salvayre, R.; Negre-Salvayre, A. Lipid oxidation products and oxidized low-density lipoproteins impair platelet-derived growth factor receptor activity in smooth muscle cells: Implication in atherosclerosis. *Redox Rep. Commun. Free Radic. Res.* **2007**, *12*, 96–100.
446. Van Campenhout, A.; Moran, C.S.; Parr, A.; Clancy, P.; Rush, C.; Jakubowski, H.; Golledge, J. Role of homocysteine in aortic calcification and osteogenic cell differentiation. *Atherosclerosis* **2009**, *202*, 557–566.
447. Liu, T.; Lin, J.; Ju, T.; Chu, L.; Zhang, L. Vascular smooth muscle cell differentiation to an osteogenic phenotype involves matrix metalloproteinase-2 modulation by homocysteine. *Mol. Cell. Biochem.* **2015**, *406*, 139–149.
448. Li, J.; Chai, S.; Tang, C.; Du, J. Homocysteine potentiates calcification of cultured rat aortic smooth muscle cells. *Life Sci.* **2003**, *74*, 451–461.
449. Ren, J.-L.; Hou, Y.-L.; Ni, X.-Q.; Zhu, Q.; Chen, Y.; Zhang, L.-S.; Liu, X.; Xue, C.-D.; Wu, N.; Yu, Y.-R.; et al. Intermedin-53 Ameliorates Homocysteine-Promoted Atherosclerotic Calcification by Inhibiting Endoplasmic Reticulum Stress. *J. Cardiovasc. Pharmacol. Ther.* **2019**, 1074248419885633.
450. Zhu, L.; Zhang, N.; Yan, R.; Yang, W.; Cong, G.; Yan, N.; Ma, W.; Hou, J.; Yang, L.; Jia, S. Hyperhomocysteinemia induces vascular calcification by activating the transcription factor RUNX2 via Krüppel-like factor 4 up-regulation in mice. *J. Biol. Chem.* **2019**, *294*, 19465–19474.
451. Kim, B.J.; Kim, B.S.; Kang, J.H. Plasma homocysteine and coronary artery calcification in Korean men. *Eur. J. Prev. Cardiol.* **2015**, *22*, 478–485.

452. Peña-Duque, M.A.; Baños-González, M.A.; Valente-Acosta, B.; Rodríguez-Lobato, L.G.; Martínez-Ríos, M.A.; Cardoso-Saldaña, G.; Barragán-García, R.; Herrera-Alarcón, V.; Linares-López, C.; Delgado-Granados, H.; et al. Homocysteine is related to aortic mineralization in patients with ischemic heart disease. *J. Atheroscler. Thromb.* **2012**, *19*, 292–297.
453. Kronenberg, F.; Mündle, M.; Längle, M.; Neyer, U. Prevalence and progression of peripheral arterial calcifications in patients with ESRD. *Am. J. Kidney Dis. Off. J. Natl. Kidney Found.* **2003**, *41*, 140–148.
454. Rasouli, M.L.; Nasir, K.; Blumenthal, R.S.; Park, R.; Aziz, D.C.; Budoff, M.J. Plasma homocysteine predicts progression of atherosclerosis. *Atherosclerosis* **2005**, *181*, 159–165.
455. Kullo, I.J.; Li, G.; Bielak, L.F.; Bailey, K.R.; Sheedy, P.F.; Peyser, P.A.; Turner, S.T.; Kardina, S.L.R. Association of plasma homocysteine with coronary artery calcification in different categories of coronary heart disease risk. *Mayo Clin. Proc.* **2006**, *81*, 177–182.
456. Baber, U.; de Lemos, J.A.; Khera, A.; McGuire, D.K.; Omland, T.; Toto, R.D.; Hedayati, S.S. Non-traditional risk factors predict coronary calcification in chronic kidney disease in a population-based cohort. *Kidney Int.* **2008**, *73*, 615–621.
457. Held, C.; Sumner, G.; Sheridan, P.; McQueen, M.; Smith, S.; Dagenais, G.; Yusuf, S.; Lonn, E. Correlations between plasma homocysteine and folate concentrations and carotid atherosclerosis in high-risk individuals: Baseline data from the Homocysteine and Atherosclerosis Reduction Trial (HART). *Vasc. Med. Lond. Engl.* **2008**, *13*, 245–253.
458. Karger, A.B.; Steffen, B.T.; Nomura, S.O.; Guan, W.; Garg, P.K.; Szklo, M.; Budoff, M.J.; Tsai, M.Y. Association Between Homocysteine and Vascular Calcification Incidence, Prevalence, and Progression in the MESA Cohort. *J. Am. Heart Assoc.* **2020**, *9*, e013934.
459. Novaro, G.M.; Aronow, H.D.; Mayer-Sabik, E.; Griffin, B.P. Plasma homocysteine and calcific aortic valve disease. *Heart Br. Card. Soc.* **2004**, *90*, 802–803.
460. de Menezes, F.L.; Koch-Nogueira, P.C.; do Val, M.L.D.M.; Pestana, J.O.M.; Jorgetti, V.; Dos Reis, M.A.; Dos Reis Monteiro, M.L.G.; Leite, H.P. Is arterial calcification in children and adolescents with end-stage renal disease a rare finding? *Nephrol. Carlton Vic* **2019**, *24*, 696–702.
461. Godsland, I.F.; Elkeles, R.S.; Feher, M.D.; Nugara, F.; Rubens, M.B.; Richmond, W.; Khan, M.; Donovan, J.; Anyaoku, V.; Flather, M.D.; et al. Coronary calcification, homocysteine, C-reactive protein and the metabolic syndrome in Type 2 diabetes: The Prospective Evaluation of Diabetic Ischaemic Heart Disease by Coronary Tomography (PREDICT) Study. *Diabet. Med. J. Br. Diabet. Assoc.* **2006**, *23*, 1192–1200.
462. Krajnc, M.; Pečovnik Balon, B.; Krajnc, I. Non-traditional risk factors for coronary calcification and its progression in patients with type 2 diabetes: The impact of postprandial glycemia and fetuin-A. *J. Int. Med. Res.* **2019**, *47*, 846–858.
463. Nonaka, H.; Tsujino, T.; Watari, Y.; Emoto, N.; Yokoyama, M. Taurine prevents the decrease in expression and secretion of extracellular superoxide dismutase induced by homocysteine: Amelioration of homocysteine-induced endoplasmic reticulum stress by taurine. *Circulation* **2001**, *104*, 1165–1170.
464. Wang, G.; Siow, Y.L.; O, K. Homocysteine stimulates nuclear factor kappaB activity and monocyte chemoattractant protein-1 expression in vascular smooth-muscle cells: A possible role for protein kinase C. *Biochem. J.* **2000**, *352 Pt 3*, 817–826.
465. Ke, X.D.; Foucault-Bertaud, A.; Genovesio, C.; Dignat-George, F.; Lamy, E.; Charpiot, P. Homocysteine modulates the proteolytic potential of human arterial smooth muscle cells through a reactive oxygen species dependant mechanism. *Mol. Cell. Biochem.* **2010**, *335*, 203–210.
466. Papatheodorou, L.; Weiss, N. Vascular oxidant stress and inflammation in hyperhomocysteinemia. *Antioxid. Redox Signal.* **2007**, *9*, 1941–1958.
467. Su, J.; Wang, S.; Hunag, Y.; Jinag, Y. [A comparative study on pathogenic effects of homocysteine and cysteine on atherosclerosis]. *Wei Sheng Yan Jiu* **2009**, *38*, 43–46.
468. Wei, L.-H.; Chao, N.-X.; Gao, S.; Yu, Y.-T.; Shi, L.; Ma, X.-B.; Liao, N.; Lan, K.; Luo, Y.; Xie, Z.-Y.; et al. Homocysteine induces vascular inflammatory response via SMAD7 hypermethylation in human umbilical vein smooth muscle cells. *Microvasc. Res.* **2018**, *120*, 8–12.
469. Zhao, J.; Chen, H.; Liu, N.; Chen, J.; Gu, Y.; Chen, J.; Yang, K. Role of Hyperhomocysteinemia and Hyperuricemia in Pathogenesis of Atherosclerosis. *J. Stroke Cerebrovasc. Dis. Off. J. Natl. Stroke Assoc.* **2017**, *26*, 2695–2699.

470. Chang, L.; Xu, J.; Zhao, J.; Pang, Y.; Tang, C.; Qi, Y. Taurine antagonized oxidative stress injury induced by homocysteine in rat vascular smooth muscle cells. *Acta Pharmacol. Sin.* **2004**, *25*, 341–346.
471. Pang, X.; Si, J.; Xu, S.; Li, Y.; Liu, J. Simvastatin inhibits homocysteine-induced CRP generation via interfering with the ROS-p38/ERK1/2 signal pathway in rat vascular smooth muscle cells. *Vascul. Pharmacol.* **2017**, *88*, 42–47.
472. Desai, A.; Lankford, H.A.; Warren, J.S. Homocysteine augments cytokine-induced chemokine expression in human vascular smooth muscle cells: Implications for atherogenesis. *Inflammation* **2001**, *25*, 179–186.
473. Zhang, L.; Jin, M.; Hu, X.-S.; Zhu, J.-H. Homocysteine stimulates nuclear factor kappaB activity and interleukin-6 expression in rat vascular smooth muscle cells. *Cell Biol. Int.* **2006**, *30*, 592–597.
474. Pang, X.; Liu, J.; Zhao, J.; Mao, J.; Zhang, X.; Feng, L.; Han, C.; Li, M.; Wang, S.; Wu, D. Homocysteine induces the expression of C-reactive protein via NMDAR-ROS-MAPK-NF- $\kappa$ B signal pathway in rat vascular smooth muscle cells. *Atherosclerosis* **2014**, *236*, 73–81.
475. Huang, T.; Yuan, G.; Zhang, Z.; Zou, Z.; Li, D. Cardiovascular pathogenesis in hyperhomocysteinemia. *Asia Pac. J. Clin. Nutr.* **2008**, *17*, 8–16.
476. Buemi, M.; Marino, D.; Di Pasquale, G.; Floccari, F.; Ruello, A.; Aloisi, C.; Corica, F.; Senatore, M.; Romeo, A.; Frisina, N. Effects of homocysteine on proliferation, necrosis, and apoptosis of vascular smooth muscle cells in culture and influence of folic acid. *Thromb. Res.* **2001**, *104*, 207–213.
477. Rasmussen, L.M.; Hansen, P.R.; Ledet, T. Homocysteine and the production of collagens, proliferation and apoptosis in human arterial smooth muscle cells. *APMIS Acta Pathol. Microbiol. Immunol. Scand.* **2004**, *112*, 598–604.
478. Zhan, X.L.; Yang, X.H.; Gu, Y.H.; Guo, L.L.; Jin, H.M. Epigallocatechin gallate protects against homocysteine-induced vascular smooth muscle cell proliferation. *Mol. Cell. Biochem.* **2018**, *439*, 131–140.
479. Zhang, H.-P.; Wang, Y.-H.; Cao, C.-J.; Yang, X.-M.; Ma, S.-C.; Han, X.-B.; Yang, X.-L.; Yang, A.-N.; Tian, J.; Xu, H.; et al. A regulatory circuit involving miR-143 and DNMT3a mediates vascular smooth muscle cell proliferation induced by homocysteine. *Mol. Med. Rep.* **2016**, *13*, 483–490.
480. Ma, S.-C.; Zhang, H.-P.; Jiao, Y.; Wang, Y.-H.; Zhang, H.; Yang, X.-L.; Yang, A.-N.; Jiang, Y.-D. Homocysteine-induced proliferation of vascular smooth muscle cells occurs via PTEN hypermethylation and is mitigated by Resveratrol. *Mol. Med. Rep.* **2018**, *17*, 5312–5319.
481. Meng, L.; Zhou, C.; Guo, Y.; Zhai, X.; Jiang, C.; Li, G.; Chi, J.; Guo, H. [Exploring the active ingredient of Chinese yellow wine which could inhibit the Hcy induced proliferation and migration of vascular smooth muscle cells]. *Zhongguo Ying Yong Sheng Li Xue Za Zhi Zhongguo Yingyong Shenglixue Zazhi Chin. J. Appl. Physiol.* **2015**, *31*, 437–442.
482. Shirpoor, A.; Salami, S.; Khadem Ansari, M.-H.; Ilkhanizadeh, B.; Abdollahzadeh, N. Ethanol promotes rat aortic vascular smooth muscle cell proliferation via increase of homocysteine and oxidized-low-density lipoprotein. *J. Cardiol.* **2013**, *62*, 374–378.
483. Han, X.-B.; Zhang, H.-P.; Cao, C.-J.; Wang, Y.-H.; Tian, J.; Yang, X.-L.; Yang, A.-N.; Wang, J.; Jiang, Y.-D.; Xu, H. Aberrant DNA methylation of the PDGF gene in homocysteine-mediated VSMC proliferation and its underlying mechanism. *Mol. Med. Rep.* **2014**, *10*, 947–954.
484. Lin, H.; Ni, T.; Zhang, J.; Meng, L.; Gao, F.; Pan, S.; Luo, H.; Xu, F.; Ru, G.; Chi, J.; et al. Knockdown of Herp alleviates hyperhomocysteinemia mediated atherosclerosis through the inhibition of vascular smooth muscle cell phenotype switching. *Int. J. Cardiol.* **2018**, *269*, 242–249.
485. Lee, H.-Y.; Chae, I.-H.; Kim, H.-S.; Park, Y.-B.; Choi, Y.-S.; Lee, Y.-W.; Park, S.-J.; Cha, Y.-J. Differential effects of homocysteine on porcine endothelial and vascular smooth muscle cells. *J. Cardiovasc. Pharmacol.* **2002**, *39*, 643–651.
486. Tsai, J.C.; Perrella, M.A.; Yoshizumi, M.; Hsieh, C.M.; Haber, E.; Schlegel, R.; Lee, M.E. Promotion of vascular smooth muscle cell growth by homocysteine: A link to atherosclerosis. *Proc. Natl. Acad. Sci. U. S. A.* **1994**, *91*, 6369–6373.
487. Carmody, B.J.; Arora, S.; Avena, R.; Cosby, K.; Sidawy, A.N. Folic acid inhibits homocysteine-induced proliferation of human arterial smooth muscle cells. *J. Vasc. Surg.* **1999**, *30*, 1121–1128.
488. Yang, F.; Tan, H.-M.; Wang, H. Hyperhomocysteinemia and atherosclerosis. *Sheng Li Xue Bao* **2005**, *57*, 103–114.
489. Ma, S.-C.; Cao, J.-C.; Zhang, H.-P.; Jiao, Y.; Zhang, H.; He, Y.-Y.; Wang, Y.-H.; Yang, X.-L.; Yang, A.-N.; Tian, J.; et al. Aberrant promoter methylation of multiple genes in VSMC proliferation induced by Hcy. *Mol. Med. Rep.* **2017**, *16*, 7775–7783.

490. Bao, X.; Zheng, H. Atorvastatin attenuates homocysteine-induced migration of smooth muscle cells through mevalonate pathway involving reactive oxygen species and p38 MAPK. *Clin. Exp. Pharmacol. Physiol.* **2015**, *42*, 865–873.
491. Jiang, C.; Zhang, H.; Zhang, W.; Kong, W.; Zhu, Y.; Zhang, H.; Xu, Q.; Li, Y.; Wang, X. Homocysteine promotes vascular smooth muscle cell migration by induction of the adipokine resistin. *Am. J. Physiol. Cell Physiol.* **2009**, *297*, C1466–C1476.
492. Doronzo, G.; Russo, I.; Mattiello, L.; Trovati, M.; Anfossi, G. Homocysteine rapidly increases matrix metalloproteinase-2 expression and activity in cultured human vascular smooth muscle cells. Role of phosphatidylinositol 3-kinase and mitogen activated protein kinase pathways. *Thromb. Haemost.* **2005**, *94*, 1285–1293.
493. Chen, Y.; Liu, R.; Zhang, G.; Yu, Q.; Jia, M.; Zheng, C.; Wang, Y.; Xu, C.; Zhang, Y.; Liu, E. Hypercysteinemia promotes atherosclerosis by reducing protein S-nitrosylation. *Biomed. Pharmacother. Biomedicine Pharmacother.* **2015**, *70*, 253–259.
494. Chen, J.; Zhang, X.; Zhang, H.; Liu, T.; Zhang, H.; Teng, J.; Ji, J.; Ding, X. Indoxyl Sulfate Enhance the Hypermethylation of Klotho and Promote the Process of Vascular Calcification in Chronic Kidney Disease. *Int. J. Biol. Sci.* **2016**, *12*, 1236–1246.
495. Hénaut, L.; Mary, A.; Chillon, J.-M.; Kamel, S.; Massy, Z. The Impact of Uremic Toxins on Vascular Smooth Muscle Cell Function. *Toxins* **2018**, *10*, 218.
496. Zhang, H.; Chen, J.; Shen, Z.; Gu, Y.; Xu, L.; Hu, J.; Zhang, X.; Ding, X. Indoxyl sulfate accelerates vascular smooth muscle cell calcification via microRNA-29b dependent regulation of Wnt/ $\beta$ -catenin signaling. *Toxicol. Lett.* **2018**, *284*, 29–36.
497. Wu, Y.; Han, X.; Wang, L.; Diao, Z.; Liu, W. Indoxyl sulfate promotes vascular smooth muscle cell calcification via the JNK/Pit-1 pathway. *Ren. Fail.* **2016**, *38*, 1702–1710.
498. Opdebeeck, B.; Maudsley, S.; Azmi, A.; De Maré, A.; De Leger, W.; Meijers, B.; Verhulst, A.; Evenepoel, P.; D’Haese, P.C.; Neven, E. Indoxyl Sulfate and p-Cresyl Sulfate Promote Vascular Calcification and Associate with Glucose Intolerance. *J. Am. Soc. Nephrol. JASN* **2019**, *30*, 751–766.
499. Asami, M.; Tanabe, K.; Ito, S.; Yoshida, E.; Aoki, J.; Tanimoto, S.; Horiuchi, Y.; Yoshida, M. Impact of Indoxyl Sulfate on Coronary Plaques in Patients on Hemodialysis. *Int. Heart. J.* **2018**, *59*, 489–496.
500. Barreto, F.C.; Barreto, D.V.; Liabeuf, S.; Meert, N.; Glorieux, G.; Temmar, M.; Choukroun, G.; Vanholder, R.; Massy, Z.A.; European Uremic Toxin Work Group (EUTox) Serum indoxyl sulfate is associated with vascular disease and mortality in chronic kidney disease patients. *Clin. J. Am. Soc. Nephrol. CJASN* **2009**, *4*, 1551–1558.
501. Taki, K.; Takayama, F.; Tsuruta, Y.; Niwa, T. Oxidative stress, advanced glycation end product, and coronary artery calcification in hemodialysis patients. *Kidney Int.* **2006**, *70*, 218–224.
502. Muteliefu, G.; Enomoto, A.; Jiang, P.; Takahashi, M.; Niwa, T. Indoxyl sulphate induces oxidative stress and the expression of osteoblast-specific proteins in vascular smooth muscle cells. *Nephrol. Dial. Transplant. Off. Publ. Eur. Dial. Transpl. Assoc. — Eur. Ren. Assoc.* **2009**, *24*, 2051–2058.
503. Shimizu, H.; Hirose, Y.; Goto, S.; Nishijima, F.; Zrelli, H.; Zghonda, N.; Niwa, T.; Miyazaki, H. Indoxyl sulfate enhances angiotensin II signaling through upregulation of epidermal growth factor receptor expression in vascular smooth muscle cells. *Life Sci.* **2012**, *91*, 172–177.
504. Shimizu, H.; Hirose, Y.; Nishijima, F.; Tsubakihara, Y.; Miyazaki, H. ROS and PDGF-beta [corrected] receptors are critically involved in indoxyl sulfate actions that promote vascular smooth muscle cell proliferation and migration. *Am. J. Physiol. Cell Physiol.* **2009**, *297*, C389–C396.
505. Yisireyili, M.; Saito, S.; Abudureyimu, S.; Adelibieke, Y.; Ng, H.-Y.; Nishijima, F.; Takeshita, K.; Murohara, T.; Niwa, T. Indoxyl sulfate-induced activation of (pro)renin receptor promotes cell proliferation and tissue factor expression in vascular smooth muscle cells. *PLoS ONE* **2014**, *9*, e109268.
506. Muteliefu, G.; Enomoto, A.; Niwa, T. Indoxyl sulfate promotes proliferation of human aortic smooth muscle cells by inducing oxidative stress. *J. Ren. Nutr. Off. J. Counc. Ren. Nutr. Natl. Kidney Found.* **2009**, *19*, 29–32.
507. Muteliefu, G.; Shimizu, H.; Enomoto, A.; Nishijima, F.; Takahashi, M.; Niwa, T. Indoxyl sulfate promotes vascular smooth muscle cell senescence with upregulation of p53, p21, and prelamin A through oxidative stress. *Am. J. Physiol. Cell Physiol.* **2012**, *303*, C126–C134.

508. Adelibieke, Y.; Yisireyili, M.; Ng, H.-Y.; Saito, S.; Nishijima, F.; Niwa, T. Indoxyl sulfate induces IL-6 expression in vascular endothelial and smooth muscle cells through OAT3-mediated uptake and activation of AhR/NF- $\kappa$ B pathway. *Nephron Exp. Nephrol.* **2014**, *128*, 1–8.
509. Yamamoto, H.; Tsuruoka, S.; Ioka, T.; Ando, H.; Ito, C.; Akimoto, T.; Fujimura, A.; Asano, Y.; Kusano, E. Indoxyl sulfate stimulates proliferation of rat vascular smooth muscle cells. *Kidney Int.* **2006**, *69*, 1780–1785.
510. Ryu, J.-H.; Park, H.; Kim, S.-J. The effects of indoxyl sulfate-induced endothelial microparticles on neointimal hyperplasia formation in an ex vivo model. *Ann. Surg. Treat. Res.* **2017**, *93*, 11–17.
511. Lin, C.-Y.; Hsu, S.-C.; Lee, H.-S.; Lin, S.-H.; Tsai, C.-S.; Huang, S.-M.; Shih, C.-C.; Hsu, Y.-J. Enhanced expression of glucose transporter-1 in vascular smooth muscle cells via the Akt/tuberosclerosis complex subunit 2 (TSC2)/mammalian target of rapamycin (mTOR)/ribosomal S6 protein kinase (S6K) pathway in experimental renal failure. *J. Vasc. Surg.* **2013**, *57*, 475–485.
512. Ng, H.-Y.; Bolati, W.; Lee, C.-T.; Chien, Y.-S.; Yisireyili, M.; Saito, S.; Pei, S.-N.; Nishijima, F.; Niwa, T. Indoxyl Sulfate Downregulates Mas Receptor via Aryl Hydrocarbon Receptor/Nuclear Factor-kappa B, and Induces Cell Proliferation and Tissue Factor Expression in Vascular Smooth Muscle Cells. *Nephron* **2016**, *133*, 205–212.
513. Mozar, A.; Louvet, L.; Morlière, P.; Godin, C.; Boudot, C.; Kamel, S.; Drüeke, T.B.; Massy, Z.A. Uremic toxin indoxyl sulfate inhibits human vascular smooth muscle cell proliferation. *Ther. Apher. Dial. Off. Peer-Rev. J. Int. Soc. Apher. Jpn. Soc. Apher. Jpn. Soc. Dial. Ther.* **2011**, *15*, 135–139.
514. Taki, K.; Tsuruta, Y.; Niwa, T. Indoxyl sulfate and atherosclerotic risk factors in hemodialysis patients. *Am. J. Nephrol.* **2007**, *27*, 30–35.
515. Parhami, F.; Tintut, Y.; Ballard, A.; Fogelman, A.M.; Demer, L.L. Leptin enhances the calcification of vascular cells: Artery wall as a target of leptin. *Circ. Res.* **2001**, *88*, 954–960.
516. Dubey, L.; Hesong, Z. Role of leptin in atherogenesis. *Exp. Clin. Cardiol.* **2006**, *11*, 269–275.
517. Zeadin, M.G.; Butcher, M.K.; Shaughnessy, S.G.; Werstuck, G.H. Leptin promotes osteoblast differentiation and mineralization of primary cultures of vascular smooth muscle cells by inhibiting glycogen synthase kinase (GSK)-3 $\beta$ . *Biochem. Biophys. Res. Commun.* **2012**, *425*, 924–930.
518. Zeadin, M.; Butcher, M.; Werstuck, G.; Khan, M.; Yee, C.K.; Shaughnessy, S.G. Effect of leptin on vascular calcification in apolipoprotein E-deficient mice. *Arterioscler. Thromb. Vasc. Biol.* **2009**, *29*, 2069–2075.
519. Chen, N.X.; O'Neill, K.; Akl, N.K.; Moe, S.M. Adipocyte induced arterial calcification is prevented with sodium thiosulfate. *Biochem. Biophys. Res. Commun.* **2014**, *449*, 151–156.
520. Iribarren, C.; Husson, G.; Go, A.S.; Lo, J.C.; Fair, J.M.; Rubin, G.D.; Hlatky, M.A.; Fortmann, S.P. Plasma leptin levels and coronary artery calcification in older adults. *J. Clin. Endocrinol. Metab.* **2007**, *92*, 729–732.
521. Szulc, P.; Amri, E.Z.; Varennes, A.; Panaia-Ferrari, P.; Fontas, E.; Goudable, J.; Chapurlat, R.; Breuil, V. Positive Association of High Leptin Level and Abdominal Aortic Calcification in Men The Prospective MINOS Study. *Circ. J. Off. J. Jpn. Circ. Soc.* **2018**, *82*, 2954–2961.
522. de Oliveira, R.B.; Liabeuf, S.; Okazaki, H.; Lenglet, A.; Desjardins, L.; Lemke, H.-D.; Vanholder, R.; Choukroun, G.; Massy, Z.A.; European Uremic Toxin Work Group (EUTox) The clinical impact of plasma leptin levels in a cohort of chronic kidney disease patients. *Clin. Kidney, J.* **2013**, *6*, 63–70.
523. Liu, G.-Y.; Liang, Q.-H.; Cui, R.-R.; Liu, Y.; Wu, S.-S.; Shan, P.-F.; Yuan, L.-Q.; Liao, E.-Y. Leptin promotes the osteoblastic differentiation of vascular smooth muscle cells from female mice by increasing RANKL expression. *Endocrinology* **2014**, *155*, 558–567.
524. Li, L.; Mamputu, J.-C.; Wiernsperger, N.; Renier, G. Signaling pathways involved in human vascular smooth muscle cell proliferation and matrix metalloproteinase-2 expression induced by leptin: Inhibitory effect of metformin. *Diabetes* **2005**, *54*, 2227–2234.
525. Ghantous, C.M.; Azrak, Z.; Hanache, S.; Abou-Kheir, W.; Zeidan, A. Differential Role of Leptin and Adiponectin in Cardiovascular System. *Int. J. Endocrinol.* **2015**, *2015*, 534320.
526. Huang, F.; Xiong, X.; Wang, H.; You, S.; Zeng, H. Leptin-induced vascular smooth muscle cell proliferation via regulating cell cycle, activating ERK1/2 and NF-kappaB. *Acta Biochim. Biophys. Sin.* **2010**, *42*, 325–331.
527. Shi, R.; Chen, X.; Zhu, J.; Chen, L.; Zhu, S. [Leptin promotes the proliferation of airway smooth muscle cells and the expressions of HIF-1 $\alpha$  and NF- $\kappa$ B of hypoxic rats]. *Xi Bao Yu Fen Zi Mian Yi Xue Za Zhi Chin. J. Cell. Mol. Immunol.* **2015**, *31*, 32–35.

528. Yu, Y.-M.; Tsai, C.-C.; Tzeng, Y.-W.; Chang, W.-C.; Chiang, S.-Y.; Lee, M.-F. Ursolic acid suppresses leptin-induced cell proliferation in rat vascular smooth muscle cells. *Can. J. Physiol. Pharmacol.* **2017**, *95*, 811–818.
529. Liu, W.; Zhu, S.; Chen, Y.; Wu, X.; Ni, W.; Chen, Y.; Zhao, L. [The effects of leptin on apoptosis of airway smooth muscle cells via the PI3K/Akt signaling pathway]. *Zhonghua Jie He He Hu Xi Za Zhi Zhonghua Jiehe He Huxi Zazhi Chin. J. Tuberc. Respir. Dis.* **2012**, *35*, 915–918.
530. Schroeter, M.R.; Leifheit-Nestler, M.; Hubert, A.; Schumann, B.; Glückermann, R.; Eschholz, N.; Krüger, N.; Lutz, S.; Hasenfuss, G.; Konstantinides, S.; et al. Leptin promotes neointima formation and smooth muscle cell proliferation via NADPH oxidase activation and signalling in caveolin-rich microdomains. *Cardiovasc. Res.* **2013**, *99*, 555–565.
531. Schäfer, K.; Halle, M.; Goeschen, C.; Dellas, C.; Pynn, M.; Loskutoff, D.J.; Konstantinides, S. Leptin promotes vascular remodeling and neointimal growth in mice. *Arterioscler. Thromb. Vasc. Biol.* **2004**, *24*, 112–117.
532. Bodary, P.F.; Shen, Y.; Ohman, M.; Bahrou, K.L.; Vargas, F.B.; Cudney, S.S.; Wickenheiser, K.J.; Myers, M.G.; Eitzman, D.T. Leptin regulates neointima formation after arterial injury through mechanisms independent of blood pressure and the leptin receptor/STAT3 signaling pathways involved in energy balance. *Arterioscler. Thromb. Vasc. Biol.* **2007**, *27*, 70–76.
533. Oda, A.; Taniguchi, T.; Yokoyama, M. Leptin stimulates rat aortic smooth muscle cell proliferation and migration. *Kobe, J. Med. Sci.* **2001**, *47*, 141–150.
534. Chai, S.; Wang, W.; Liu, J.; Guo, H.; Zhang, Z.; Wang, C.; Wang, J. Leptin knockout attenuates hypoxia-induced pulmonary arterial hypertension by inhibiting proliferation of pulmonary arterial smooth muscle cells. *Transl. Res. J. Lab. Clin. Med.* **2015**, *166*, 772–782.
535. Xie, X.; Li, S.; Zhu, Y.; Liu, L.; Ke, R.; Wang, J.; Yan, X.; Yang, L.; Gao, L.; Zang, W.; et al. Egr-1 mediates leptin-induced PPAR $\gamma$  reduction and proliferation of pulmonary artery smooth muscle cells. *Mol. Biol. Cell* **2018**, *29*, 356–362.
536. Noblet, J.N.; Goodwill, A.G.; Sassoon, D.J.; Kiel, A.M.; Tune, J.D. Leptin augments coronary vasoconstriction and smooth muscle proliferation via a Rho-kinase-dependent pathway. *Basic Res. Cardiol.* **2016**, *111*, 25.
537. Shin, H.-J.; Oh, J.; Kang, S.M.; Lee, J.H.; Shin, M.-J.; Hwang, K.-C.; Jang, Y.; Chung, J.H. Leptin induces hypertrophy via p38 mitogen-activated protein kinase in rat vascular smooth muscle cells. *Biochem. Biophys. Res. Commun.* **2005**, *329*, 18–24.
538. Shen, Y.; He, Z.; Lu, D.; Ou, B.; Pan, J.; Wang, X.; Li, J. [Leptin promotes neointimal formation by stimulating vascular smooth muscle cell proliferation through leptin receptor]. *Zhonghua Xin Xue Guan Bing Za Zhi* **2009**, *37*, 634–638.
539. Schroeter, M.R.; Eschholz, N.; Herzberg, S.; Jerchel, I.; Leifheit-Nestler, M.; Czepluch, F.S.; Chalikias, G.; Konstantinides, S.; Schäfer, K. Leptin-dependent and leptin-independent paracrine effects of perivascular adipose tissue on neointima formation. *Arterioscler. Thromb. Vasc. Biol.* **2013**, *33*, 980–987.
540. Tsai, Y.-C.; Leu, S.-Y.; Peng, Y.-J.; Lee, Y.-M.; Hsu, C.-H.; Chou, S.-C.; Yen, M.-H.; Cheng, P.-Y. Genistein suppresses leptin-induced proliferation and migration of vascular smooth muscle cells and neointima formation. *J. Cell. Mol. Med.* **2017**, *21*, 422–431.
541. Tsai, Y.-C.; Lee, Y.-M.; Hsu, C.-H.; Leu, S.-Y.; Chiang, H.-Y.; Yen, M.-H.; Cheng, P.-Y. The effect of ferulic acid ethyl ester on leptin-induced proliferation and migration of aortic smooth muscle cells. *Exp. Mol. Med.* **2015**, *47*, e180.
542. Nair, P.; Radford, K.; Fanat, A.; Janssen, L.J.; Peters-Golden, M.; Cox, P.G. The effects of leptin on airway smooth muscle responses. *Am. J. Respir. Cell Mol. Biol.* **2008**, *39*, 475–481.
543. Rodríguez, A.; Gómez-Ambrosi, J.; Catalán, V.; Fortuño, A.; Frühbeck, G. Leptin inhibits the proliferation of vascular smooth muscle cells induced by angiotensin II through nitric oxide-dependent mechanisms. *Mediators Inflamm.* **2010**, *2010*, 105489.
544. Bohlen, F.; Kratzsch, J.; Mueller, M.; Seidel, B.; Friedman-Einat, M.; Witzigmann, H.; Teupser, D.; Koerner, A.; Storck, M.; Thiery, J. Leptin inhibits cell growth of human vascular smooth muscle cells. *Vascul. Pharmacol.* **2007**, *46*, 67–71.
545. Liu, R.; Chen, B.; Chen, J.; Lan, J. Leptin upregulates smooth muscle cell expression of MMP-9 to promote plaque destabilization by activating AP-1 via the leptin receptor/MAPK/ERK signaling pathways. *Exp. Ther. Med.* **2018**, *16*, 5327–5333.

546. Shan, J.; Nguyen, T.B.; Totary-Jain, H.; Dansky, H.; Marx, S.O.; Marks, A.R. Leptin-enhanced neointimal hyperplasia is reduced by mTOR and PI3K inhibitors. *Proc. Natl. Acad. Sci. U. S. A.* **2008**, *105*, 19006–19011.
547. Schneiderman, J.; Schaefer, K.; Kolodgie, F.D.; Savion, N.; Kotev-Emeth, S.; Dardik, R.; Simon, A.J.; Halak, M.; Pariente, C.; Engelberg, I.; et al. Leptin locally synthesized in carotid atherosclerotic plaques could be associated with lesion instability and cerebral emboli. *J. Am. Heart Assoc.* **2012**, *1*, e001727.
548. Beltowski, J. Leptin and atherosclerosis. *Atherosclerosis* **2006**, *189*, 47–60.
549. Rezzani, R.; Favero, G.; Stacchiotti, A.; Rodella, L.F. Endothelial and vascular smooth muscle cell dysfunction mediated by cyclophilin A and the atheroprotective effects of melatonin. *Life Sci.* **2013**, *92*, 875–882.
550. Pascua, P.; Camello-Almaraz, C.; Camello, P.J.; Martin-Cano, F.E.; Vara, E.; Fernandez-Tresguerres, J.A.; Pozo, M.J. Melatonin, and to a lesser extent growth hormone, restores colonic smooth muscle physiology in old rats. *J. Pineal Res.* **2011**, *51*, 405–415.
551. Sönmez, M.F.; Narin, F.; Balcioglu, E. Melatonin and vitamin C attenuates alcohol-induced oxidative stress in aorta. *Basic Clin. Pharmacol. Toxicol.* **2009**, *105*, 410–415.
552. Shi, D.; Xiao, X.; Wang, J.; Liu, L.; Chen, W.; Fu, L.; Xie, F.; Huang, W.; Deng, W. Melatonin suppresses proinflammatory mediators in lipopolysaccharide-stimulated CRL1999 cells via targeting MAPK, NF- $\kappa$ B, c/EBP $\beta$ , and p300 signaling. *J. Pineal Res.* **2012**, *53*, 154–165.
553. Jin, H.; Wang, Y.; Zhou, L.; Liu, L.; Zhang, P.; Deng, W.; Yuan, Y. Melatonin attenuates hypoxic pulmonary hypertension by inhibiting the inflammation and the proliferation of pulmonary arterial smooth muscle cells. *J. Pineal Res.* **2014**, *57*, 442–450.
554. Chang, T.; Wang, R.; Wu, L. Methylglyoxal-induced nitric oxide and peroxynitrite production in vascular smooth muscle cells. *Free Radic. Biol. Med.* **2005**, *38*, 286–293.
555. Dhar, I.; Dhar, A.; Wu, L.; Desai, K. Arginine attenuates methylglyoxal- and high glucose-induced endothelial dysfunction and oxidative stress by an endothelial nitric-oxide synthase-independent mechanism. *J. Pharmacol. Exp. Ther.* **2012**, *342*, 196–204.
556. Wu, L.; Juurlink, B.H.J. Increased methylglyoxal and oxidative stress in hypertensive rat vascular smooth muscle cells. *Hypertens. Dallas Tex 1979* **2002**, *39*, 809–814.
557. Wang, H.; Liu, J.; Wu, L. Methylglyoxal-induced mitochondrial dysfunction in vascular smooth muscle cells. *Biochem. Pharmacol.* **2009**, *77*, 1709–1716.
558. Yabe-Nishimura, C.; Nishinaka, T.; Iwata, K.; Seo, H.G. Up-regulation of aldose reductase by the substrate, methylglyoxal. *Chem. Biol. Interact.* **2003**, *143–144*, 317–323.
559. Wu, L. The pro-oxidant role of methylglyoxal in mesenteric artery smooth muscle cells. *Can. J. Physiol. Pharmacol.* **2005**, *83*, 63–68.
560. Chang, K.C.; Paek, K.S.; Kim, H.J.; Lee, Y.S.; Yabe-Nishimura, C.; Seo, H.G. Substrate-Induced Up-Regulation of Aldose Reductase by Methylglyoxal, a Reactive Oxoaldehyde Elevated in Diabetes. *Mol. Pharmacol.* **2002**, *61*, 1184–1191.
561. Alomar, F.; Singh, J.; Jang, H.-S.; Rozanzki, G.J.; Shao, C.H.; Padanilam, B.J.; Mayhan, W.G.; Bidasee, K.R. Smooth muscle-generated methylglyoxal impairs endothelial cell-mediated vasodilatation of cerebral microvessels in type 1 diabetic rats. *Br. J. Pharmacol.* **2016**, *173*, 3307–3326.
562. Chang, T.; Wang, R.; Olson, D.J.H.; Mousseau, D.D.; Ross, A.R.S.; Wu, L. Modification of Akt1 by methylglyoxal promotes the proliferation of vascular smooth muscle cells. *FASEB J. Off. Publ. Fed. Am. Soc. Exp. Biol.* **2011**, *25*, 1746–1757.
563. Cao, W.; Chang, T.; Li, X.-Q.; Wang, R.; Wu, L. Dual effects of fructose on ChREBP and FoxO1/3 $\alpha$  are responsible for AldoB up-regulation and vascular remodelling. *Clin. Sci. Lond. Engl. 1979* **2017**, *131*, 309–325.
564. Wang, Z.; Jiang, Y.; Liu, N.; Ren, L.; Zhu, Y.; An, Y.; Chen, D. Advanced glycation end-product N $\epsilon$ -carboxymethyl-Lysine accelerates progression of atherosclerotic calcification in diabetes. *Atherosclerosis* **2012**, *221*, 387–396.
565. Li, L.H.; Ye, F.; Fu, X.L.; Xu, S.N.; Bao, Z.Y.; Sun, Z.; Yan, J.C.; Wu, J.N.; Wang, Z.Q. [Association between serum N $\epsilon$ -carboxymethyl-lysine level and anterior tibial arterial plaque calcification in patients with diabetic foot post foot amputation]. *Zhonghua Xin Xue Guan Bing Za Zhi* **2017**, *45*, 958–962.
566. Kislinger, T.; Fu, C.; Huber, B.; Qu, W.; Taguchi, A.; Du Yan, S.; Hofmann, M.; Yan, S.F.; Pischetsrieder, M.; Stern, D.; et al. N(epsilon)-(carboxymethyl)lysine adducts of proteins are ligands for receptor for advanced glycation end products that activate cell signaling pathways and modulate gene expression. *J. Biol. Chem.* **1999**, *274*, 31740–31749.

567. Meloche, J.; Paulin, R.; Courboulin, A.; Lambert, C.; Barrier, M.; Bonnet, P.; Bissierier, M.; Roy, M.; Sussman, M.A.; Agharazii, M.; et al. RAGE-Dependent Activation of the Oncoprotein Pim1 Plays a Critical Role in Systemic Vascular Remodeling Processes. *Arterioscler. Thromb. Vasc. Biol.* **2011**, *31*, 2114–2124.
568. Maciel, R.A.P.; Rempel, L.C.T.; Bosquetti, B.; Finco, A.B.; Pecoits-Filho, R.; Souza, W.M. de; Stinghen, A.E.M. p-cresol but not p-cresyl sulfate stimulate MCP-1 production via NF- $\kappa$ B p65 in human vascular smooth muscle cells. *J. Bras. Nefrol. Orgao Of. Soc. Bras. E Lat.-Am. Nefrol.* **2016**, *38*, 153–160.
569. Guo, J.; Lu, L.; Hua, Y.; Huang, K.; Wang, I.; Huang, L.; Fu, Q.; Chen, A.; Chan, P.; Fan, H.; et al. Vasculopathy in the setting of cardiorenal syndrome: Roles of protein-bound uremic toxins. *Am. J. Physiol. Heart Circ. Physiol.* **2017**, *313*, H1–H13.
570. Liabeuf, S.; Barreto, D.V.; Barreto, F.C.; Meert, N.; Glorieux, G.; Schepers, E.; Temmar, M.; Choukroun, G.; Vanholder, R.; Massy, Z.A.; et al. Free p-cresylsulphate is a predictor of mortality in patients at different stages of chronic kidney disease. *Nephrol. Dial. Transplant. Off. Publ. Eur. Dial. Transpl. Assoc.—Eur. Ren. Assoc.* **2010**, *25*, 1183–1191.
571. Watanabe, H.; Miyamoto, Y.; Enoki, Y.; Ishima, Y.; Kadowaki, D.; Kotani, S.; Nakajima, M.; Tanaka, M.; Matsushita, K.; Mori, Y.; et al. p-Cresyl sulfate, a uremic toxin, causes vascular endothelial and smooth muscle cell damages by inducing oxidative stress. *Pharmacol. Res. Perspect.* **2015**, *3*, e00092.
572. Gross, P.; Massy, Z.A.; Henaut, L.; Boudot, C.; Cagnard, J.; March, C.; Kamel, S.; Drueke, T.B.; Six, I. Para-cresyl sulfate acutely impairs vascular reactivity and induces vascular remodeling. *J. Cell. Physiol.* **2015**, *230*, 2927–2935.
573. Han, H.; Chen, Y.; Zhu, Z.; Su, X.; Ni, J.; Du, R.; Zhang, R.; Jin, W. p-Cresyl sulfate promotes the formation of atherosclerotic lesions and induces plaque instability by targeting vascular smooth muscle cells. *Front. Med.* **2016**, *10*, 320–329.
574. Schmidt, S.; Westhoff, T.H.; Krauser, P.; Zidek, W.; van der Giet, M. The uraemic toxin phenylacetic acid increases the formation of reactive oxygen species in vascular smooth muscle cells. *Nephrol. Dial. Transplant. Off. Publ. Eur. Dial. Transpl. Assoc.—Eur. Ren. Assoc.* **2008**, *23*, 65–71.
575. Facchiano, F.; D’Arcangelo, D.; Riccomi, A.; Lentini, A.; Beninati, S.; Capogrossi, M.C. Transglutaminase activity is involved in polyamine-induced programmed cell death. *Exp. Cell Res.* **2001**, *271*, 118–129.
576. Bagdade, J.D.; Subbaiah, P.V.; Bartos, D.; Bartos, F.; Campbell, R.A. Polyamines: An unrecognised cardiovascular risk factor in chronic dialysis? *Lancet Lond. Engl.* **1979**, *1*, 412–413.
577. Subbaiah, P.V.; Bagdade, J.D. Polyamines and atherosclerosis. Platelet releasate and other mitogens stimulate putrescine transport in arterial smooth muscle cells. *Atherosclerosis* **1982**, *44*, 49–60.
578. Mrhová, O.; Hladovec, J.; Urbanová, D.; Rossmann, P. The effect of polyamines on the endothelium and vascular wall metabolism in the rat. *Czech. Med.* **1991**, *14*, 97–105.
579. De Meyer Guido, R.Y.; Grootaert Mandy, O.J.; Michiels Cédéric, F.; Kurdi Ammar; Schrijvers Dorien, M.; Martinet Wim Autophagy in Vascular Disease. *Circ. Res.* **2015**, *116*, 468–479.
580. Grossi, M.; Persson, L.; Swärd, K.; Turczyńska, K.M.; Forte, A.; Hellstrand, P.; Nilsson, B.-O. Inhibition of polyamine formation antagonizes vascular smooth muscle cell proliferation and preserves the contractile phenotype. *Basic Clin. Pharmacol. Toxicol.* **2014**, *115*, 379–388.
581. Nishida, K.; Abiko, T.; Ishihara, M.; Tomikawa, M. Arterial injury-induced smooth muscle cell proliferation in rats is accompanied by increase in polyamine synthesis and level. *Atherosclerosis* **1990**, *83*, 119–125.
582. Liang, M.; Ekblad, E.; Hellstrand, P.; Nilsson, B.-O. Polyamine synthesis inhibition attenuates vascular smooth muscle cell migration. *J. Vasc. Res.* **2004**, *41*, 141–147.
583. Michiels, C.F.; Kurdi, A.; Timmermans, J.-P.; De Meyer, G.R.Y.; Martinet, W. Spermidine reduces lipid accumulation and necrotic core formation in atherosclerotic plaques via induction of autophagy. *Atherosclerosis* **2016**, *251*, 319–327.
584. Ciceri, P.; Volpi, E.; Brenna, I.; Elli, F.; Borghi, E.; Brancaccio, D.; Cozzolino, M. The combination of lanthanum chloride and the calcimimetic calindol delays the progression of vascular smooth muscle cells calcification. *Biochem. Biophys. Res. Commun.* **2012**, *418*, 770–773.
585. Sinha-Hikim, I.; Shen, R.; Paul Lee, W.-N.N.; Crum, A.; Vaziri, N.D.; Norris, K.C. Effects of a novel cystine-based glutathione precursor on oxidative stress in vascular smooth muscle cells. *Am. J. Physiol. Cell Physiol.* **2010**, *299*, C638–C642.



586. Sinha-Hikim, I.; Shen, R.; Kovacheva, E.; Crum, A.; Vaziri, N.D.; Norris, K.C. Inhibition of apoptotic signalling in spermine-treated vascular smooth muscle cells by a novel glutathione precursor. *Cell Biol. Int.* **2010**, *34*, 503–511.
587. Zhu, L.; Xiao, R.; Zhang, X.; Lang, Y.; Liu, F.; Yu, Z.; Zhang, J.; Su, Y.; Lu, Y.; Wang, T.; et al. Spermine on Endothelial Extracellular Vesicles Mediates Smoking-Induced Pulmonary Hypertension Partially Through Calcium-Sensing Receptor. *Arterioscler. Thromb. Vasc. Biol.* **2019**, *39*, 482–495.
588. Wei, C.; Li, H.-Z.; Wang, Y.-H.; Peng, X.; Shao, H.-J.; Li, H.-X.; Bai, S.-Z.; Lu, X.-X.; Wu, L.-Y.; Wang, R.; et al. Exogenous spermine inhibits the proliferation of human pulmonary artery smooth muscle cells caused by chemically-induced hypoxia via the suppression of the ERK1/2- and PI3K/AKT-associated pathways. *Int. J. Mol. Med.* **2016**, *37*, 39–46.
589. Li, W.; Zheng, T.; Altura, B.T.; Altura, B.M. Magnesium modulates contractile responses of rat aorta to thiocyanate: A possible relationship to smoking-induced atherosclerosis. *Toxicol. Appl. Pharmacol.* **1999**, *157*, 77–84.
590. Nagayama, K.; Morino, K.; Sekine, O.; Nakagawa, F.; Ishikado, A.; Iwasaki, H.; Okada, T.; Tawa, M.; Sato, D.; Imamura, T.; et al. Duality of n-3 Polyunsaturated Fatty Acids on Mcp-1 Expression in Vascular Smooth Muscle: A Potential Role of 4-Hydroxy Hexenal. *Nutrients* **2015**, *7*, 8112–8126.
591. Lee, S.J.; Seo, K.W.; Yun, M.R.; Bae, S.S.; Lee, W.S.; Hong, K.W.; Kim, C.D. 4-Hydroxynonenal enhances MMP-2 production in vascular smooth muscle cells via mitochondrial ROS-mediated activation of the Akt/NF-kappaB signaling pathways. *Free Radic. Biol. Med.* **2008**, *45*, 1487–1492.
592. Manea, A.; Manea, S.-A.; Todirita, A.; Albuлесcu, I.C.; Raicu, M.; Sasson, S.; Simionescu, M. High-glucose-increased expression and activation of NADPH oxidase in human vascular smooth muscle cells is mediated by 4-hydroxynonenal-activated PPAR $\alpha$  and PPAR $\beta/\delta$ . *Cell Tissue Res.* **2015**, *361*, 593–604.
593. Nègre-Salvayre, A.; Garoby-Salom, S.; Swiader, A.; Rouahi, M.; Pucelle, M.; Salvayre, R. Proatherogenic effects of 4-hydroxynonenal. *Free Radic. Biol. Med.* **2017**, *111*, 127–139.
594. Ruef, J.; Moser, M.; Bode, C.; Kübler, W.; Runge, M.S. 4-hydroxynonenal induces apoptosis, NF-kappaB-activation and formation of 8-isoprostane in vascular smooth muscle cells. *Basic Res. Cardiol.* **2001**, *96*, 143–150.
595. Xu, T.; Liu, S.; Ma, T.; Jia, Z.; Zhang, Z.; Wang, A. Aldehyde dehydrogenase 2 protects against oxidative stress associated with pulmonary arterial hypertension. *Redox Biol.* **2017**, *11*, 286–296.
596. Kalyankrishna, S.; Parmentier, J.-H.; Malik, K.U. Arachidonic acid-derived oxidation products initiate apoptosis in vascular smooth muscle cells. *Prostaglandins Other Lipid Mediat.* **2002**, *70*, 13–29.
597. Lee, J.Y.; Jung, G.Y.; Heo, H.J.; Yun, M.R.; Park, J.Y.; Bae, S.S.; Hong, K.W.; Lee, W.S.; Kim, C.D. 4-Hydroxynonenal induces vascular smooth muscle cell apoptosis through mitochondrial generation of reactive oxygen species. *Toxicol. Lett.* **2006**, *166*, 212–221.
598. Akiba, S.; Kumazawa, S.; Yamaguchi, H.; Hontani, N.; Matsumoto, T.; Ikeda, T.; Oka, M.; Sato, T. Acceleration of matrix metalloproteinase-1 production and activation of platelet-derived growth factor receptor beta in human coronary smooth muscle cells by oxidized LDL and 4-hydroxynonenal. *Biochim. Biophys. Acta* **2006**, *1763*, 797–804.
599. Kakishita, H.; Hattori, Y. Vascular smooth muscle cell activation and growth by 4-hydroxynonenal. *Life Sci.* **2001**, *69*, 689–697.
600. Escargueil-Blanc, I.; Salvayre, R.; Vacaresse, N.; Jürgens, G.; Darblade, B.; Arnal, J.F.; Parthasarathy, S.; Nègre-Salvayre, A. Mildly oxidized LDL induces activation of platelet-derived growth factor beta-receptor pathway. *Circulation* **2001**, *104*, 1814–1821.
601. Watanabe, T.; Pakala, R.; Katagiri, T.; Benedict, C.R. Lipid peroxidation product 4-hydroxy-2-nonenal acts synergistically with serotonin in inducing vascular smooth muscle cell proliferation. *Atherosclerosis* **2001**, *155*, 37–44.
602. Watanabe, T.; Pakala, R.; Katagiri, T.; Benedict, C.R. Mildly oxidized low-density lipoprotein acts synergistically with angiotensin II in inducing vascular smooth muscle cell proliferation. *J. Hypertens.* **2001**, *19*, 1065–1073.
603. Lee, S.J.; Baek, S.E.; Jang, M.A.; Kim, C.D. Osteopontin plays a key role in vascular smooth muscle cell proliferation via EGFR-mediated activation of AP-1 and C/EBP $\beta$  pathways. *Pharmacol. Res.* **2016**, *108*, 1–8.
604. Huang, S.; Boda, B.; Vernaz, J.; Ferreira, E.; Wiszniewski, L.; Constant, S. Establishment and characterization of an in vitro human small airway model (SmallAir<sup>TM</sup>). *Eur. J. Pharm. Biopharm. Off. J. Arbeitsgemeinschaft Pharm. Verfahrenstechnik EV* **2017**, *118*, 68–72.

605. Hattori, Y.; Hattori, S.; Kasai, K. 4-hydroxynonenal prevents NO production in vascular smooth muscle cells by inhibiting nuclear factor-kappaB-dependent transcriptional activation of inducible NO synthase. *Arterioscler. Thromb. Vasc. Biol.* **2001**, *21*, 1179–1183.
606. Huh, J.Y.; Son, D.J.; Lee, Y.; Lee, J.; Kim, B.; Lee, H.M.; Jo, H.; Choi, S.; Ha, H.; Chung, M.-H. 8-Hydroxy-2-deoxyguanosine prevents plaque formation and inhibits vascular smooth muscle cell activation through Rac1 inactivation. *Free Radic. Biol. Med.* **2012**, *53*, 109–121.
607. Schepers, E.; Glorieux, G.; Dou, L.; Cerini, C.; Gayrard, N.; Louvet, L.; Maugard, C.; Preus, P.; Rodriguez-Ortiz, M.; Argiles, A.; et al. Guanidino compounds as cause of cardiovascular damage in chronic kidney disease: An in vitro evaluation. *Blood Purif.* **2010**, *30*, 277–287.
608. Jang, J.J.; Berkheimer, S.B.; Merchant, M.; Krishnaswami, A. Asymmetric dimethylarginine and coronary artery calcium scores are increased in patients infected with human immunodeficiency virus. *Atherosclerosis* **2011**, *217*, 514–517.
609. Iribarren, C.; Husson, G.; Sydow, K.; Wang, B.-Y.; Sidney, S.; Cooke, J.P. Asymmetric dimethyl-arginine and coronary artery calcification in young adults entering middle age: The CARDIA Study. *Eur. J. Cardiovasc. Prev. Rehabil. Off. J. Eur. Soc. Cardiol. Work. Groups Epidemiol. Prev. Card. Rehabil. Exerc. Physiol.* **2007**, *14*, 222–229.
610. Kobayashi, S.; Oka, M.; Maesato, K.; Ikee, R.; Mano, T.; Hidekazu, M.; Ohtake, T. Coronary Artery Calcification, ADMA, and Insulin Resistance in CKD Patients. *Clin. J. Am. Soc. Nephrol.* **2008**, *3*, 1289–1295.
611. Kiani, A.N.; Mahoney, J.A.; Petri, M. Asymmetric dimethylarginine is a marker of poor prognosis and coronary calcium in systemic lupus erythematosus. *J. Rheumatol.* **2007**, *34*, 1502–1505.
612. Krzanowski, M.; Krzanowska, K.; Gajda, M.; Dumnicka, P.; Kopeć, G.; Guzik, B.; Woziwodzka, K.; Dziewierz, A.; Litwin, J.A.; Sułowicz, W. Asymmetric dimethylarginine as a useful risk marker of radial artery calcification in patients with advanced kidney disease. *Pol. Arch. Intern. Med.* **2018**, *128*, 157–165.
613. Coen, G.; Mantella, D.; Sardella, D.; Beraldi, M.P.; Ferrari, I.; Pierantozzi, A.; Lippi, B.; Di Giulio, S. Asymmetric dimethylarginine, vascular calcifications and parathyroid hormone serum levels in hemodialysis patients. *J. Nephrol.* **2009**, *22*, 616–622.
614. Yuan, Q.; Jiang, D.-J.; Chen, Q.-Q.; Wang, S.; Xin, H.-Y.; Deng, H.-W.; Li, Y.-J. Role of asymmetric dimethylarginine in homocysteine-induced apoptosis of vascular smooth muscle cells. *Biochem. Biophys. Res. Commun.* **2007**, *356*, 880–885.
615. Pekarova, M.; Koudelka, A.; Kolarova, H.; Ambrozova, G.; Klinke, A.; Cerna, A.; Kadlec, J.; Trundova, M.; Sindlerova Svihalkova, L.; Kuchta, R.; et al. Asymmetric dimethyl arginine induces pulmonary vascular dysfunction via activation of signal transducer and activator of transcription 3 and stabilization of hypoxia-inducible factor 1-alpha. *Vascul. Pharmacol.* **2015**, *73*, 138–148.
616. Li, X.-H.; Peng, J.; Tan, N.; Wu, W.-H.; Li, T.-T.; Shi, R.-Z.; Li, Y.-J. Involvement of asymmetric dimethylarginine and Rho kinase in the vascular remodeling in monocrotaline-induced pulmonary hypertension. *Vascul. Pharmacol.* **2010**, *53*, 223–229.
617. Zhou, Y.; Lan, X.; Guo, H.; Zhang, Y.; Ma, L.; Cao, J. Rho/ROCK signal cascade mediates asymmetric dimethylarginine-induced vascular smooth muscle cells migration and phenotype change. *BioMed Res. Int.* **2014**, *2014*, 683707.
618. Sun, L.; Zhang, T.; Yu, X.; Xin, W.; Lan, X.; Zhang, D.; Huang, C.; Du, G. Asymmetric dimethylarginine confers the communication between endothelial and smooth muscle cells and leads to VSMC migration through p38 and ERK1/2 signaling cascade. *FEBS Lett.* **2011**, *585*, 2727–2734.
619. Zou, T.; Liu, N.; Li, S.; Su, Y.; Man, Y.; Lu, D. [Vitamin E inhibits homocysteine-mediated smooth muscle cell proliferation]. *Nan Fang Yi Ke Da Xue Xue Bao* **2007**, *27*, 783–786.
620. Fleischhacker, E.; Esenabhalu, V.E.; Holzmann, S.; Skrabal, F.; Koidl, B.; Kostner, G.M.; Graier, W.F. In human hypercholesterolemia increased reactivity of vascular smooth muscle cells is due to altered subcellular Ca(2+) distribution. *Atherosclerosis* **2000**, *149*, 33–42.
621. Alzogaibi, M.A.; Walsh, S.W.; Willey, A.; Fowler, A.A.; Graham, M.F. Linoleic acid, but not oleic acid, upregulates the production of interleukin-8 by human intestinal smooth muscle cells isolated from patients with Crohn's disease. *Clin. Nutr. Edinb. Scotl.* **2003**, *22*, 529–535.

622. Newman, W.H.; Zunzunegui, R.G.; Warejcka, D.J.; Dalton, M.L.; Castresana, M.R. A reactive oxygen-generating system activates nuclear factor-kappaB and releases tumor necrosis factor-alpha in coronary smooth muscle cells. *J. Surg. Res.* **1999**, *85*, 142–147.
623. Hassoun, P.M.; Shedd, A.L.; Lanzillo, J.J.; Thappa, V.; Landman, M.J.; Fanburg, B.L. Inhibition of pulmonary artery smooth muscle cell growth by hypoxanthine, xanthine, and uric acid. *Am. J. Respir. Cell Mol. Biol.* **1992**, *6*, 617–624.
624. Rao, G.N.; Corson, M.A.; Berk, B.C. Uric acid stimulates vascular smooth muscle cell proliferation by increasing platelet-derived growth factor A-chain expression. *J. Biol. Chem.* **1991**, *266*, 8604–8608.
625. Ramana, K.V.; Friedrich, B.; Srivastava, S.; Bhatnagar, A.; Srivastava, S.K. Activation of nuclear factor-kappaB by hyperglycemia in vascular smooth muscle cells is regulated by aldose reductase. *Diabetes* **2004**, *53*, 2910–2920.
626. Hattori, Y.; Hattori, S.; Sato, N.; Kasai, K. High-glucose-induced nuclear factor kappaB activation in vascular smooth muscle cells. *Cardiovasc. Res.* **2000**, *46*, 188–197.
627. Reddy, A.B.M.; Ramana, K.V.; Srivastava, S.; Bhatnagar, A.; Srivastava, S.K. Aldose reductase regulates high glucose-induced ectodomain shedding of tumor necrosis factor (TNF)-alpha via protein kinase C-delta and TNF-alpha converting enzyme in vascular smooth muscle cells. *Endocrinology* **2009**, *150*, 63–74.
628. Zhang, J.; Duarte, C.G.; Ellis, S. Contrast medium- and mannitol-induced apoptosis in heart and kidney of SHR rats. *Toxicol. Pathol.* **1999**, *27*, 427–435.
629. Kwak, H.J.; Lee, S.J.; Lee, Y.H.; Ryu, C.H.; Koh, K.N.; Choi, H.Y.; Koh, G.Y. Angiopoietin-1 inhibits irradiation- and mannitol-induced apoptosis in endothelial cells. *Circulation* **2000**, *101*, 2317–2324.
630. Orlov, S.N.; Dam, T.V.; Tremblay, J.; Hamet, P. Apoptosis in vascular smooth muscle cells: Role of cell shrinkage. *Biochem. Biophys. Res. Commun.* **1996**, *221*, 708–715.
631. Shi, L.; Ji, Y.; Liu, D.; Liu, Y.; Xu, Y.; Cao, Y.; Jiang, X.; Xu, C. Sitagliptin attenuates high glucose-induced alterations in migration, proliferation, calcification and apoptosis of vascular smooth muscle cells through ERK1/2 signal pathway. *Oncotarget* **2017**, *8*, 77168–77180.
632. Ramana, K.V.; Tammali, R.; Reddy, A.B.M.; Bhatnagar, A.; Srivastava, S.K. Aldose reductase-regulated tumor necrosis factor-alpha production is essential for high glucose-induced vascular smooth muscle cell growth. *Endocrinology* **2007**, *148*, 4371–4384.
633. Alesutan, I.; Musculus, K.; Castor, T.; Alzoubi, K.; Voelkl, J.; Lang, F. Inhibition of Phosphate-Induced Vascular Smooth Muscle Cell Osteo-/Chondrogenic Signaling and Calcification by Bafilomycin A1 and Methylamine. *Kidney Blood Press. Res.* **2015**, *40*, 490–499.
634. Hernandez, M.; Solé, M.; Boada, M.; Unzeta, M. Soluble semicarbazide sensitive amine oxidase (SSAO) catalysis induces apoptosis in vascular smooth muscle cells. *Biochim. Biophys. Acta* **2006**, *1763*, 164–173.
635. Hoffmann, G.; Frede, S.; Kenn, S.; Smolny, M.; Wachter, H.; Fuchs, D.; Grote, J.; Rieder, J.; Schobersberger, W. Neopterin-induced tumor necrosis factor-alpha synthesis in vascular smooth muscle cells in vitro. *Int. Arch. Allergy Immunol.* **1998**, *116*, 240–245.
636. Hoffmann, G.; Kenn, S.; Wirleitner, B.; Deetjen, C.; Frede, S.; Smolny, M.; Rieder, J.; Fuchs, D.; Baier-Bitterlich, G.; Schobersberger, W. Neopterin induces nitric oxide-dependent apoptosis in rat vascular smooth muscle cells. *Immunobiology* **1998**, *199*, 63–73.
637. Hoffmann, G.; Schobersberger, W.; Frede, S.; Pelzer, L.; Fandrey, J.; Wachter, H.; Fuchs, D.; Grote, J. Neopterin activates transcription factor nuclear factor-kappa B in vascular smooth muscle cells. *FEBS Lett.* **1996**, *391*, 181–184.
638. Shirai, R.; Sato, K.; Yamashita, T.; Yamaguchi, M.; Okano, T.; Watanabe-Kominato, K.; Watanabe, R.; Matsuyama, T.-A.; Ishibashi-Ueda, H.; Koba, S.; et al. Neopterin Counters Vascular Inflammation and Atherosclerosis. *J. Am. Heart Assoc.* **2018**, *7*.
639. Cui, Y.; An, S.; Jabr, S.; Maturana, J.A.; Wu, J.M.; Gutstein, W.H. The anti-proliferative effects of nicotinamide and 3-aminobenzamide on human smooth muscle cells in vitro. *Biochem. Mol. Biol. Int.* **1993**, *31*, 935–944.
640. Hao, W.; Yang, R.; Yang, Y.; Jin, S.; Li, Y.; Yuan, F.; Guo, Q.; Xiao, L.; Wang, X.; Wang, F.; et al. Stellate ganglion block ameliorates vascular calcification by inhibiting endoplasmic reticulum stress. *Life Sci.* **2018**, *193*, 1–8.
641. Zhang, H.; Faber, J.E. Trophic effect of norepinephrine on arterial intima-media and adventitia is augmented by injury and mediated by different alpha1-adrenoceptor subtypes. *Circ. Res.* **2001**, *89*, 815–822.

642. Liu, S.; Li, Y.; Zhang, Z.; Xie, F.; Xu, Q.; Huang, X.; Huang, J.; Li, C.  $\alpha$ 1-Adrenergic receptors mediate combined signals initiated by mechanical stretch stress and norepinephrine leading to accelerated mouse vein graft atherosclerosis. *J. Vasc. Surg.* **2013**, *57*, 1645–1656, 1656.e1-3.
643. Mimura, Y.; Kobayashi, S.; Notoya, K.; Okabe, M.; Kimura, I.; Horikoshi, I.; Kimura, M. Activation by alpha 1-adrenergic agonists of the progression phase in the proliferation of primary cultures of smooth muscle cells in mouse and rat aorta. *Biol. Pharm. Bull.* **1995**, *18*, 1373–1376.
644. Li, Z.; Yu, C.; Han, Y.; Ren, H.; Shi, W.; Fu, C.; He, D.; Huang, L.; Yang, C.; Wang, X.; et al. Inhibitory effect of D1-like and D3 dopamine receptors on norepinephrine-induced proliferation in vascular smooth muscle cells. *Am. J. Physiol. Heart Circ. Physiol.* **2008**, *294*, H2761–H2768.
645. Parmentier, J.-H.; Smelcer, P.; Pavicevic, Z.; Basic, E.; Idrizovic, A.; Estes, A.; Malik, K.U. PKC-zeta mediates norepinephrine-induced phospholipase D activation and cell proliferation in VSMC. *Hypertens. Dallas Tex 1979* **2003**, *41*, 794–800.
646. Wen, Y.Y.; Wang, S.X.; Chen, M.Q. Studies on age-related changes in vascular smooth muscle and their Ca<sup>2+</sup> mechanisms. *Clin. Exp. Pharmacol. Physiol.* **1999**, *26*, 840–841.
647. Jiao, L.; Wang, M.-C.; Yang, Y.-A.; Chen, E.-Q.; Xu, H.-T.; Wu, K.-Y.; Zhang, S.-M. Norepinephrine reversibly regulates the proliferation and phenotypic transformation of vascular smooth muscle cells. *Exp. Mol. Pathol.* **2008**, *85*, 196–200.
648. Bell, L.; Madri, J.A. Effect of platelet factors on migration of cultured bovine aortic endothelial and smooth muscle cells. *Circ. Res.* **1989**, *65*, 1057–1065.
649. Luo, Q.; Wang, X.; Liu, R.; Qiao, H.; Wang, P.; Jiang, C.; Zhang, Q.; Cao, Y.; Yu, H.; Qu, L. alpha1A-adrenoceptor is involved in norepinephrine-induced proliferation of pulmonary artery smooth muscle cells via CaMKII signaling. *J. Cell. Biochem.* **2019**, *120*, 9345–9355.
650. Yu, C.; Wang, Z.; Han, Y.; Liu, Y.; Wang, W.E.; Chen, C.; Wang, H.; Jose, P.A.; Zeng, C. Dopamine D<sub>4</sub> receptors inhibit proliferation and migration of vascular smooth muscle cells induced by insulin via down-regulation of insulin receptor expression. *Cardiovasc. Diabetol.* **2014**, *13*, 97.
651. Liu, R.; Zhang, Q.; Luo, Q.; Qiao, H.; Wang, P.; Yu, J.; Cao, Y.; Lu, B.; Qu, L. Norepinephrine stimulation of alpha1D-adrenoceptor promotes proliferation of pulmonary artery smooth muscle cells via ERK-1/2 signaling. *Int. J. Biochem. Cell Biol.* **2017**, *88*, 100–112.
652. Düsing, R.; Göbel, B.; Weisser, B.; Dittrich, D.; Kraemer, S.; Vetter, H. [Mechanism and significance of arteriolar media hypertrophy/ hyperplasia in arterial hypertension. Role of the Na<sup>+</sup>/H<sup>+</sup> antiport]. *Klin. Wochenschr.* **1988**, *66*, 1151–1159.
653. Shimamura, N.; Ohkuma, H. Phenotypic transformation of smooth muscle in vasospasm after aneurysmal subarachnoid hemorrhage. *Transl. Stroke Res.* **2014**, *5*, 357–364.
654. Zhang, H.; Facemire, C.S.; Banes, A.J.; Faber, J.E. Different alpha-adrenoceptors mediate migration of vascular smooth muscle cells and adventitial fibroblasts in vitro. *Am. J. Physiol. Heart Circ. Physiol.* **2002**, *282*, H2364–H2370.
655. Turner, J.L.; Bierman, E.L. Effects of glucose and sorbitol on proliferation of cultured human skin fibroblasts and arterial smooth-muscle cells. *Diabetes* **1978**, *27*, 583–588.
656. Zhang, X.; Li, Y.; Yang, P.; Liu, X.; Lu, L.; Chen, Y.; Zhong, X.; Li, Z.; Liu, H.; Ou, C.; et al. Trimethylamine-N-Oxide Promotes Vascular Calcification Through Activation of NLRP3 (Nucleotide-Binding Domain, Leucine-Rich-Containing Family, Pyrin Domain-Containing-3) Inflammasome and NF- $\kappa$ B (Nuclear Factor  $\kappa$ B) Signals. *Arterioscler. Thromb. Vasc. Biol.* **2020**, *40*, 751–765.
657. Meyer, K.A.; Benton, T.Z.; Bennett, B.J.; Jacobs, D.R.; Lloyd-Jones, D.M.; Gross, M.D.; Carr, J.J.; Gordon-Larsen, P.; Zeisel, S.H. Microbiota-Dependent Metabolite Trimethylamine N-Oxide and Coronary Artery Calcium in the Coronary Artery Risk Development in Young Adults Study (CARDIA). *J. Am. Heart Assoc.* **2016**, *5*.
658. Seldin, M.M.; Meng, Y.; Qi, H.; Zhu, W.; Wang, Z.; Hazen, S.L.; Luscis, A.J.; Shih, D.M. Trimethylamine N-Oxide Promotes Vascular Inflammation Through Signaling of Mitogen-Activated Protein Kinase and Nuclear Factor- $\kappa$ B. *J. Am. Heart Assoc.* **2016**, *5*.
659. Lau, W.L.; Vaziri, N.D. Urea, a true uremic toxin: The empire strikes back. *Clin. Sci. Lond. Engl.* 1979 **2017**, *131*, 3–12.

660. Apostolov, E.O.; Basnakian, A.G.; Ok, E.; Shah, S.V. Carbamylated low-density lipoprotein: Nontraditional risk factor for cardiovascular events in patients with chronic kidney disease. *J. Ren. Nutr. Off. J. Counc. Ren. Nutr. Natl. Kidney Found.* **2012**, *22*, 134–138.
661. Song, Z.; Zhao, Y.; Wang, X.; Xu, M.-J. [Secondary hyperuricemia in chronic renal failure promotes vascular calcification in rats]. *Sheng Li Xue Bao* **2016**, *68*, 709–715.
662. Yan, B.; Liu, D.; Zhu, J.; Pang, X. The effects of hyperuricemia on the differentiation and proliferation of osteoblasts and vascular smooth muscle cells are implicated in the elevated risk of osteopenia and vascular calcification in gout: An in vivo and in vitro analysis. *J. Cell. Biochem.* **2019**, *120*, 19660–19672.
663. Jun, J.E.; Lee, Y.-B.; Lee, S.-E.; Ahn, J.Y.; Kim, G.; Jin, S.-M.; Hur, K.Y.; Lee, M.-K.; Kang, M.R.; Kim, J.H. Elevated serum uric acid predicts the development of moderate coronary artery calcification independent of conventional cardiovascular risk factors. *Atherosclerosis* **2018**, *272*, 233–239.
664. Grossman, C.; Shemesh, J.; Koren-Morag, N.; Bornstein, G.; Ben-Zvi, I.; Grossman, E. Serum uric acid is associated with coronary artery calcification. *J. Clin. Hypertens. Greenwich Conn* **2014**, *16*, 424–428.
665. Calvo, R.Y.; Araneta, M.R.G.; Kritz-Silverstein, D.; Laughlin, G.A.; Barrett-Connor, E. Relation of serum uric acid to severity and progression of coronary artery calcium in postmenopausal White and Filipino women (from the Rancho Bernardo study). *Am. J. Cardiol.* **2014**, *113*, 1153–1158.
666. D'Marco, L.; García, I.; Vega, C. [Uric acid, atherosclerosis and vascular calcifications in chronic kidney disease]. *Invest. Clin.* **2012**, *53*, 52–59.
667. Malik, R.; Aneni, E.C.; Shahrayar, S.; Freitas, W.M.; Ali, S.S.; Veledar, E.; Latif, M.A.; Aziz, M.; Ahmed, R.; Khan, S.A.; et al. Elevated serum uric acid is associated with vascular inflammation but not coronary artery calcification in the healthy octogenarians: The Brazilian study on healthy aging. *Aging Clin. Exp. Res.* **2016**, *28*, 359–362.
668. Corry, D.B.; Eslami, P.; Yamamoto, K.; Nyby, M.D.; Makino, H.; Tuck, M.L. Uric acid stimulates vascular smooth muscle cell proliferation and oxidative stress via the vascular renin-angiotensin system. *J. Hypertens.* **2008**, *26*, 269–275.
669. Tang, L.; Xu, Y.; Wei, Y.; He, X. Uric acid induces the expression of TNF- $\alpha$  via the ROS-MAPK-NF- $\kappa$ B signaling pathway in rat vascular smooth muscle cells. *Mol. Med. Rep.* **2017**, *16*, 6928–6933.
670. Oğuz, N.; Kırça, M.; Çetin, A.; Yeşilkaya, A. Effect of uric acid on inflammatory COX-2 and ROS pathways in vascular smooth muscle cells. *J. Recept. Signal Transduct. Res.* **2017**, *37*, 500–505.
671. Dai, Y.; Cao, Y.; Zhang, Z.; Vallurupalli, S.; Mehta, J.L. Xanthine Oxidase Induces Foam Cell Formation through LOX-1 and NLRP3 Activation. *Cardiovasc. Drugs Ther.* **2017**, *31*, 19–27.
672. Kang, D.-H.; Han, L.; Ouyang, X.; Kahn, A.M.; Kanellis, J.; Li, P.; Feng, L.; Nakagawa, T.; Watanabe, S.; Hosoyamada, M.; et al. Uric acid causes vascular smooth muscle cell proliferation by entering cells via a functional urate transporter. *Am. J. Nephrol.* **2005**, *25*, 425–433.
673. Kang, D.-H.; Park, S.-K.; Lee, I.-K.; Johnson, R.J. Uric acid-induced C-reactive protein expression: Implication on cell proliferation and nitric oxide production of human vascular cells. *J. Am. Soc. Nephrol. JASN* **2005**, *16*, 3553–3562.
674. Kanellis, J.; Watanabe, S.; Li, J.H.; Kang, D.H.; Li, P.; Nakagawa, T.; Wamsley, A.; Sheikh-Hamad, D.; Lan, H.Y.; Feng, L.; et al. Uric acid stimulates monocyte chemoattractant protein-1 production in vascular smooth muscle cells via mitogen-activated protein kinase and cyclooxygenase-2. *Hypertens. Dallas Tex 1979* **2003**, *41*, 1287–1293.
675. Fu, X.; Niu, N.; Li, G.; Xu, M.; Lou, Y.; Mei, J.; Liu, Q.; Sui, Z.; Sun, J.; Qu, P. Blockage of macrophage migration inhibitory factor (MIF) suppressed uric acid-induced vascular inflammation, smooth muscle cell de-differentiation, and remodeling. *Biochem. Biophys. Res. Commun.* **2019**, *508*, 440–444.
676. Kang, D.-H.; Nakagawa, T.; Feng, L.; Watanabe, S.; Han, L.; Mazzali, M.; Truong, L.; Harris, R.; Johnson, R.J. A role for uric acid in the progression of renal disease. *J. Am. Soc. Nephrol. JASN* **2002**, *13*, 2888–2897.
677. Yamamoto, Y.; Ogino, K.; Igawa, G.; Matsuura, T.; Kaetsu, Y.; Sugihara, S.; Matsubara, K.; Miake, J.; Hamada, T.; Yoshida, A.; et al. Allopurinol reduces neointimal hyperplasia in the carotid artery ligation model in spontaneously hypertensive rats. *Hypertens. Res. Off. J. Jpn. Soc. Hypertens.* **2006**, *29*, 915–921.
678. Kırça, M.; Oğuz, N.; Çetin, A.; Uzuner, F.; Yeşilkaya, A. Uric acid stimulates proliferative pathways in vascular smooth muscle cells through the activation of p38 MAPK, p44/42 MAPK and PDGFR $\beta$ . *J. Recept. Signal Transduct. Res.* **2017**, *37*, 167–173.

679. Nair, R.V.; Cao, W.; Morris, R.E. Inhibition of smooth muscle cell proliferation in vitro by leflunomide, a new immunosuppressant, is antagonized by uridine. *Immunol. Lett.* **1995**, *48*, 77–80.
